# Supplementary material for: Semisynthetic Sesquiterpene Lactones Generated by the Sensibility of Glaucolide B to Lewis and Brønsted–Lowry Acids and Bases: Cytotoxicity and Anti-Inflammatory Activities
Source: MDPI journal article supplement (doi:10.3390/molecules28031243), 2023-01-27

## Supplementary Materials Contents:

|                                                                             |    |
|-----------------------------------------------------------------------------|----|
| Spectroscopic data for semisynthetic derivative <b>2</b> .....              | 2  |
| Spectroscopic data for semisynthetic derivative <b>3</b> .....              | 5  |
| Spectroscopic data for semisynthetic derivative <b>4</b> .....              | 8  |
| Spectroscopic data for semisynthetic derivative <b>5</b> .....              | 11 |
| Spectroscopic data for semisynthetic derivative <b>6</b> .....              | 14 |
| Spectroscopic data for semisynthetic derivative <b>7</b> .....              | 17 |
| Spectroscopic data for semisynthetic derivative <b>8</b> .....              | 20 |
| Spectroscopic data for semisynthetic derivative <b>9</b> .....              | 23 |
| Spectroscopic data for semisynthetic derivative <b>7a</b> .....             | 26 |
| Spectroscopic data for semisynthetic derivative <b>8a</b> .....             | 29 |
| Spectroscopic data for semisynthetic derivative <b>9a</b> .....             | 32 |
| Spectroscopic data for semisynthetic derivative <b>7b</b> .....             | 35 |
| Spectroscopic data for semisynthetic derivative <b>7c</b> .....             | 38 |
| Spectroscopic data for semisynthetic derivative <b>7c.1</b> .....           | 41 |
| Cell viability evaluation for macrophage treated with SLs <b>1-12</b> ..... | 44 |

**Figure S1** –  $^1\text{H}$  NMR spectrum (300 MHz,  $\text{CDCl}_3$ , 295 K) of semisynthetic derivative **2**.

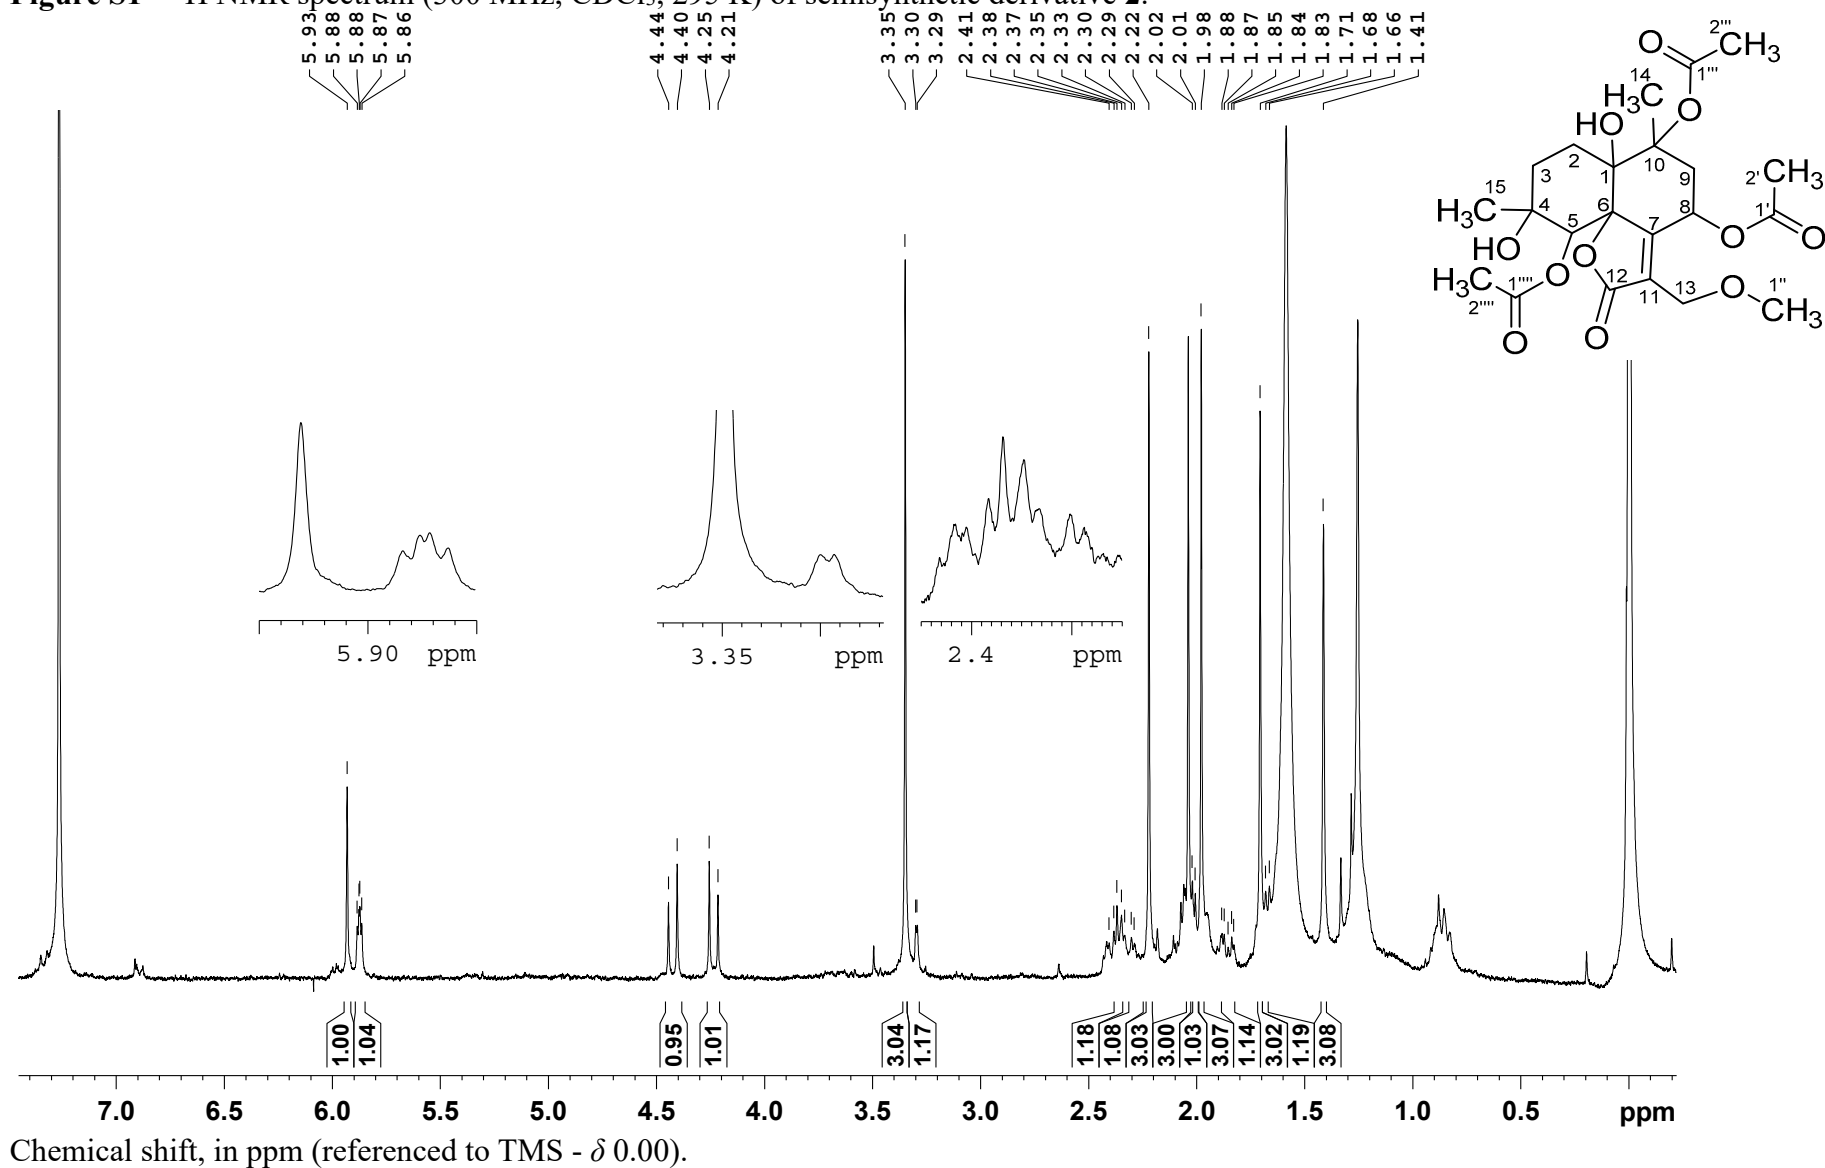

**Figure S2** – HSQC correlation map (CDCl<sub>3</sub>, 295 K) of semisynthetic derivative **2**.

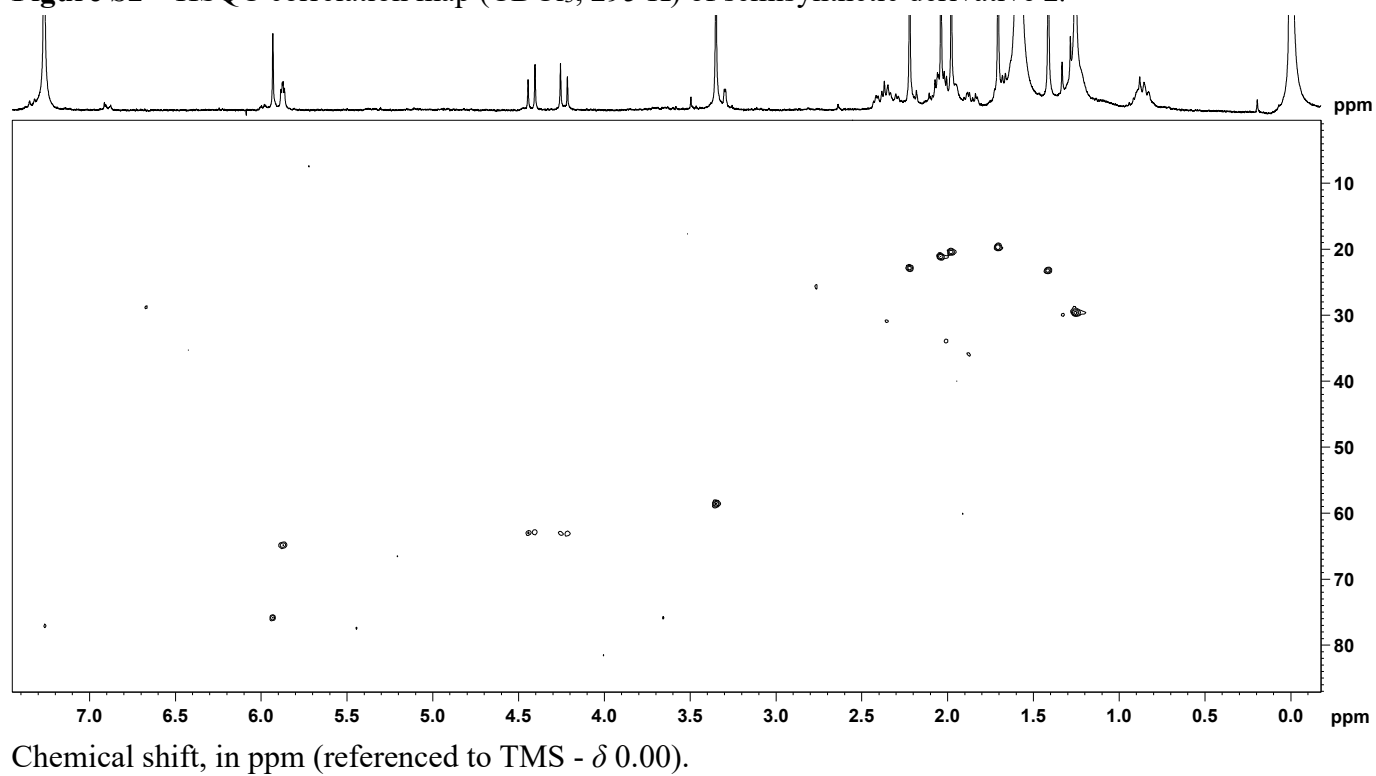

**Figure S3** – HMBC correlation map (CDCl<sub>3</sub>, 295 K) of semisynthetic derivative **2**.

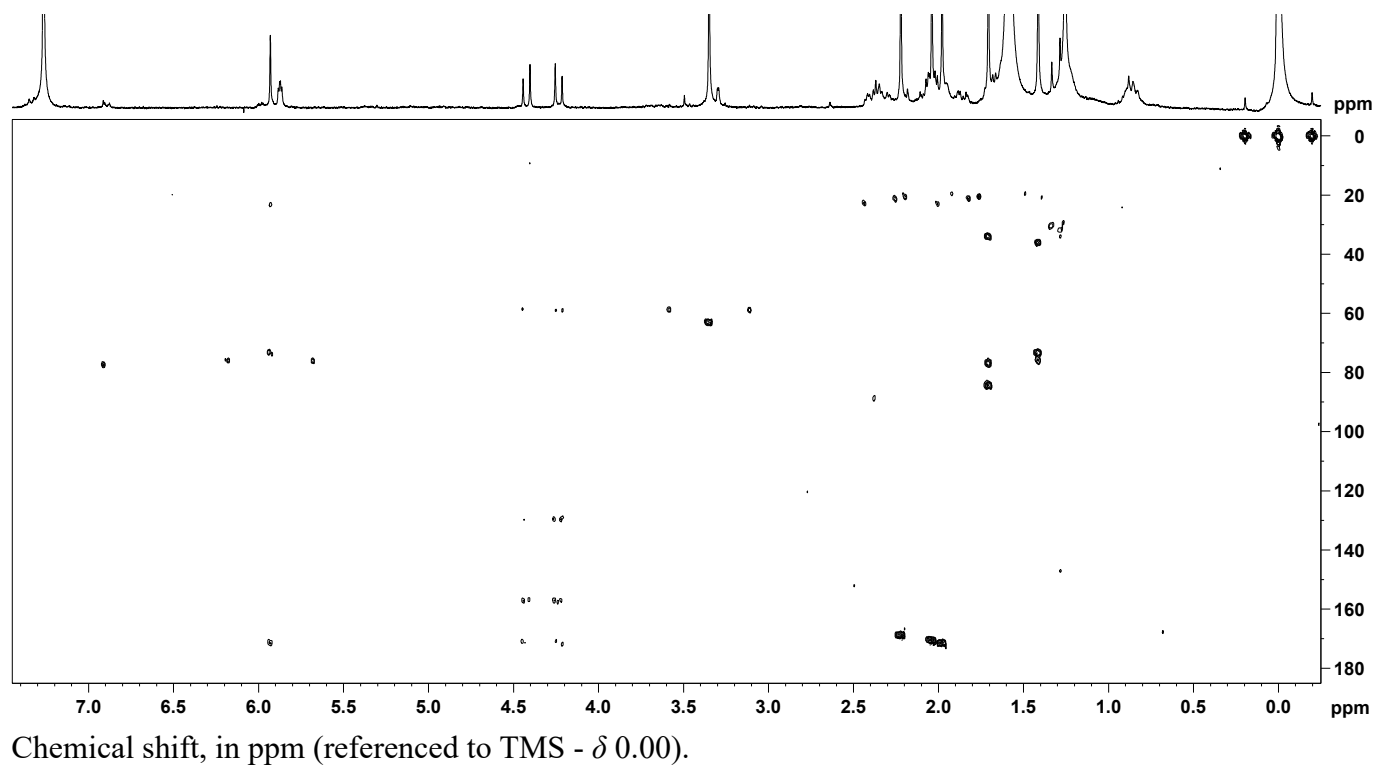

**Figure S4** – HRESIMS *full scan* (100-1200 Da) spectrum of semisynthetic derivative **2**.

RSLA42M 12032019 62 (2.292) Cm (62-55:59)

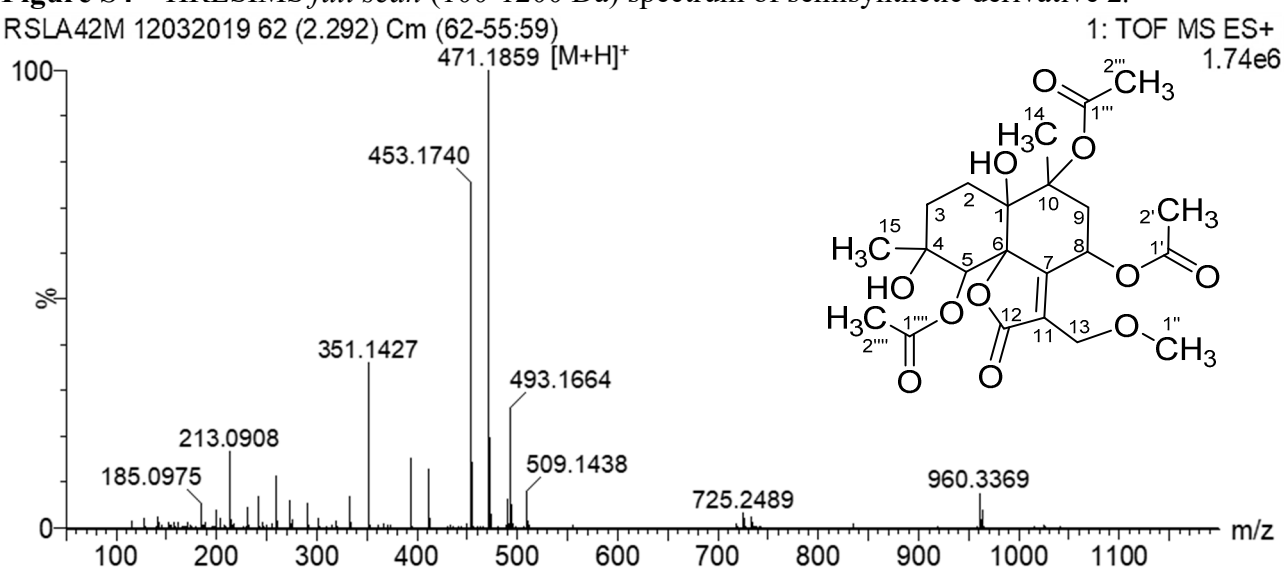

HRESIMS spectrum in positive mode achieved from UPLC-MS analysis.

**Figure S5** – UV spectrum (200-400 nm) of semisynthetic derivative **2**.

RSLA42M 12032019 2709 (2.257) Cm (2695:2720)

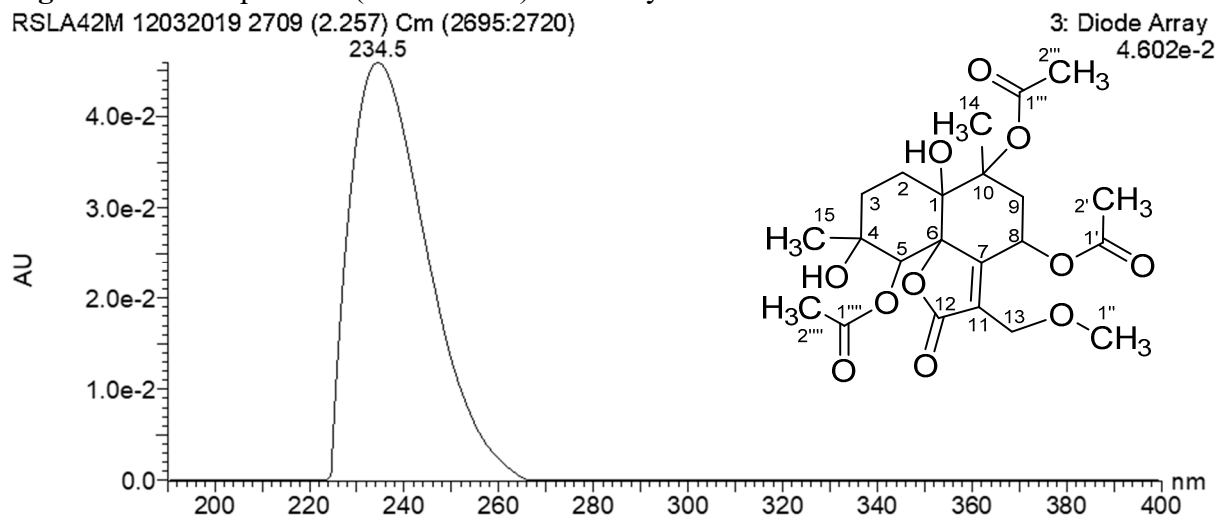

UV spectrum achieved from UPLC-PDA-MS analysis.

**Figure S6** –  $^1\text{H}$  NMR spectrum (300 MHz,  $\text{CDCl}_3$ , 295 K) of semisynthetic derivative **3**.

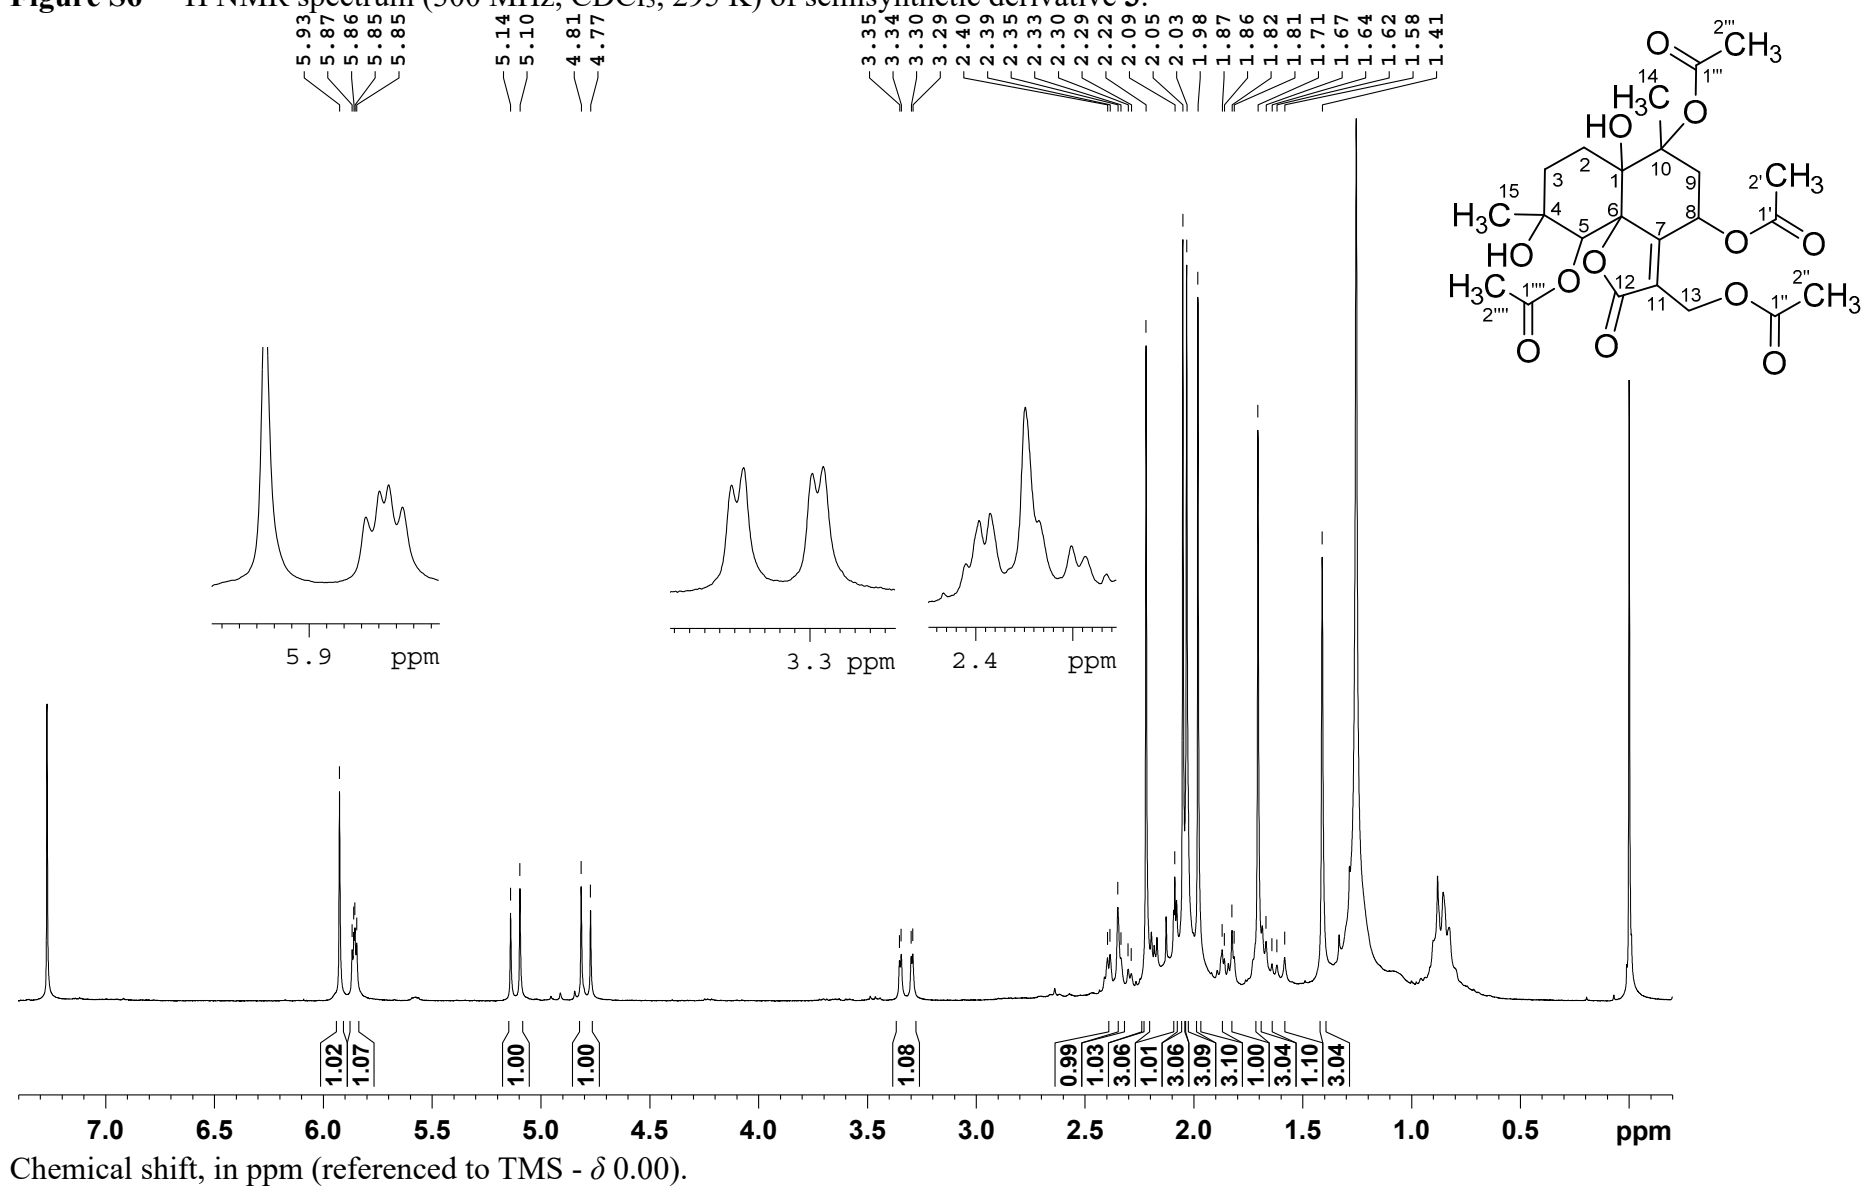

**Figure S7** – HSQC correlation map (CDCl<sub>3</sub>, 295 K) of semisynthetic derivative **3**.

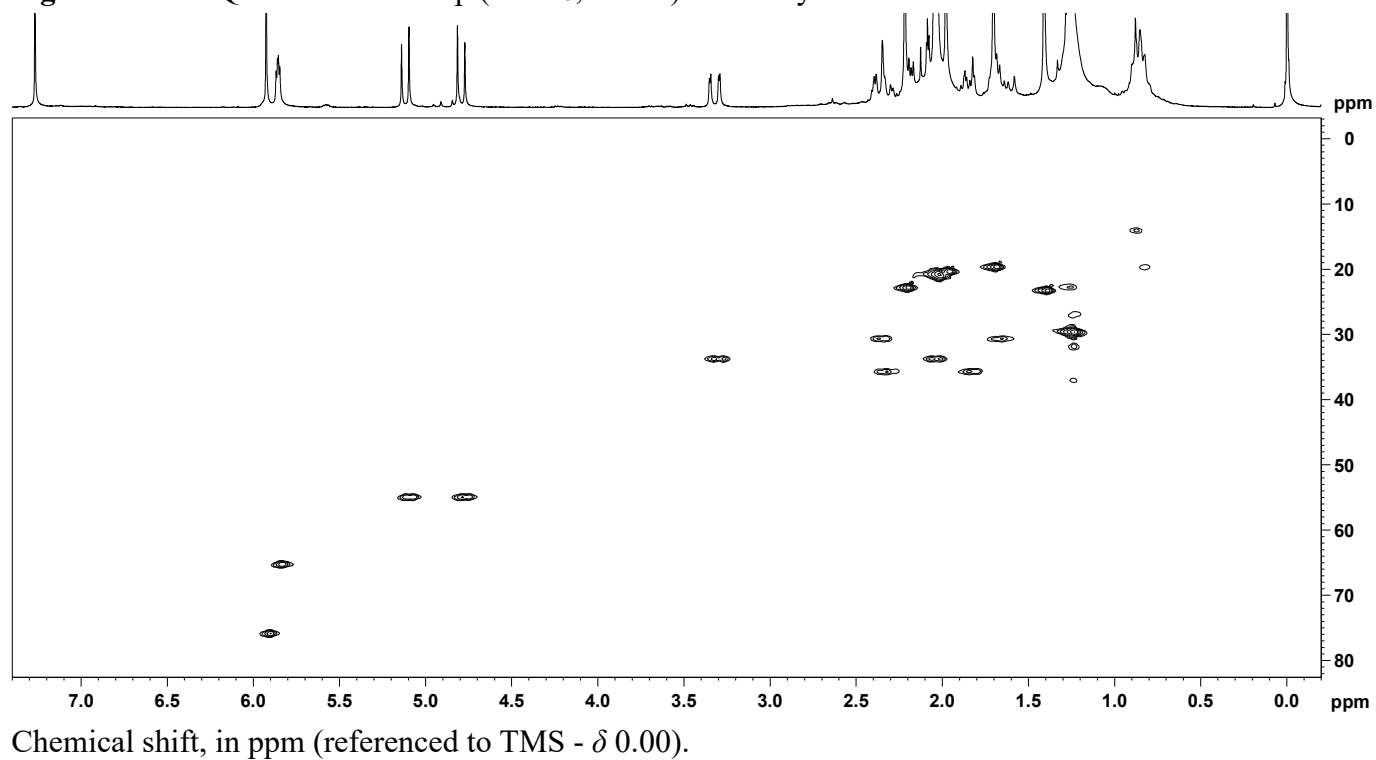

**Figure S8** – HMBC correlation map (CDCl<sub>3</sub>, 295 K) of semisynthetic derivative **3**.

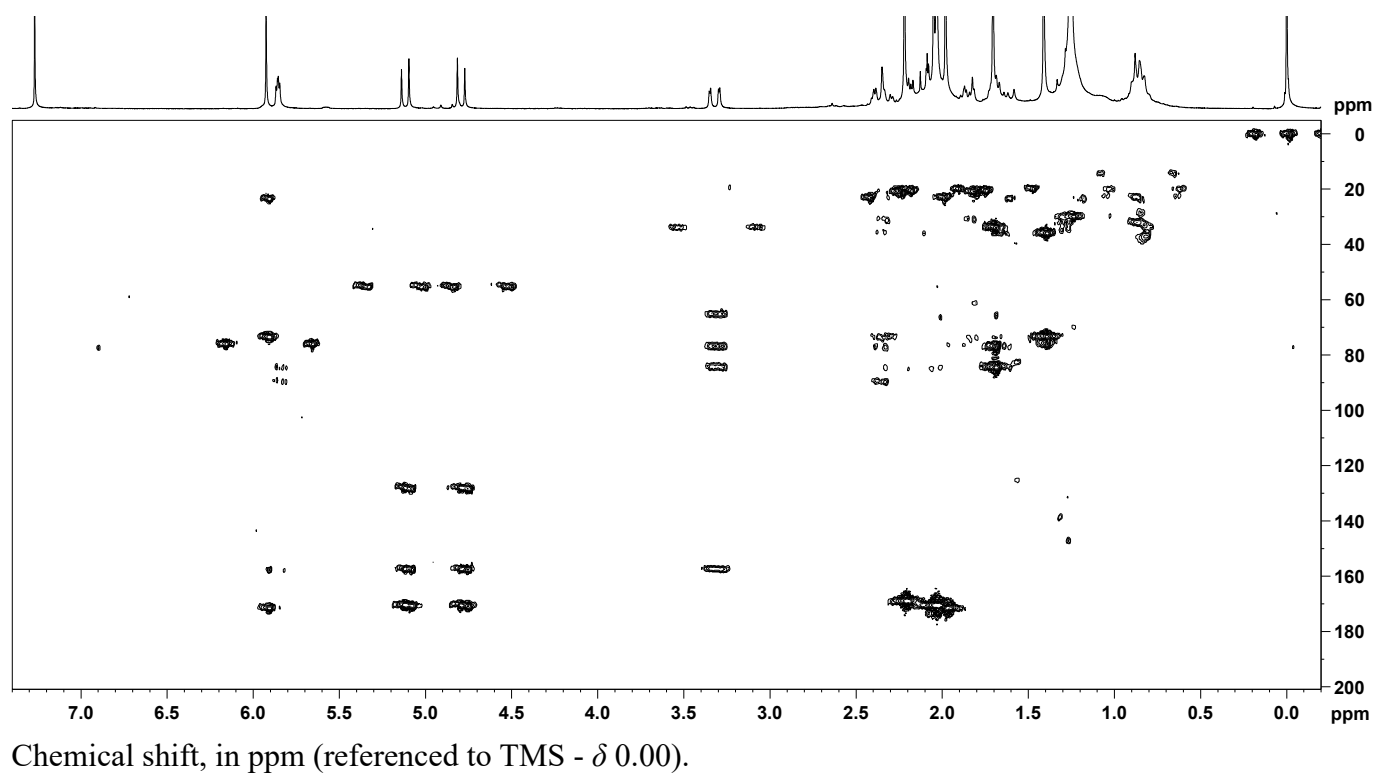

**Figure S9** – HRESIMS *full scan* (100-1200 Da) spectrum of semisynthetic derivative **3**.

RSLA43H 12032019 64 (2.365) Cm (63:64-(70:74+54:55))

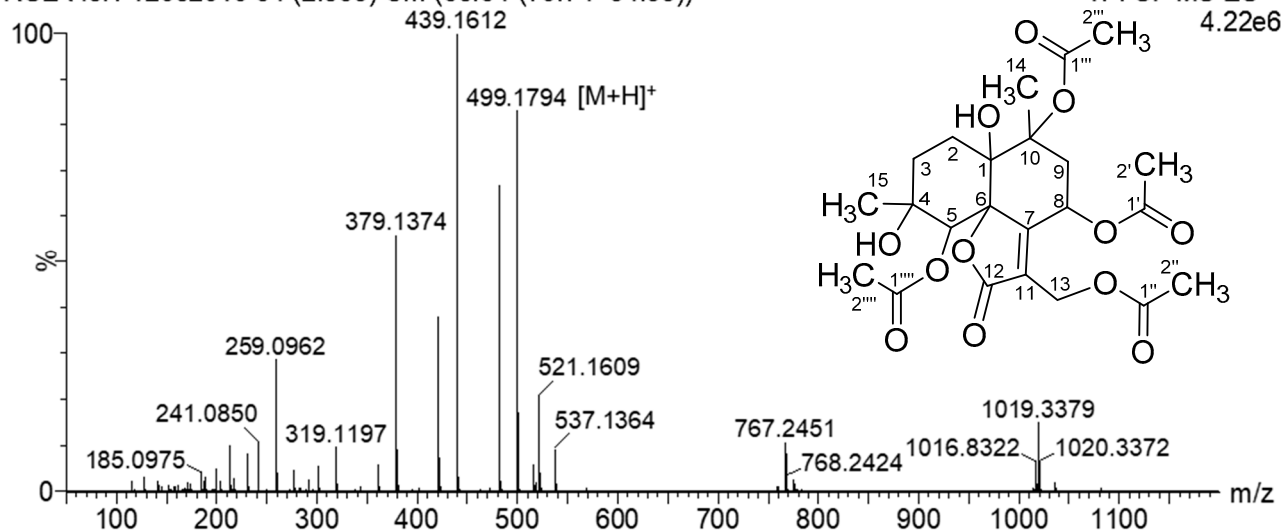

HRESIMS spectrum in positive mode achieved from UPLC-MS analysis.

**Figure S10** – UV spectrum (200-400 nm) of semisynthetic derivative **3**.

RSLA43H 12032019 2774 (2.311) Cm (2754:2787)

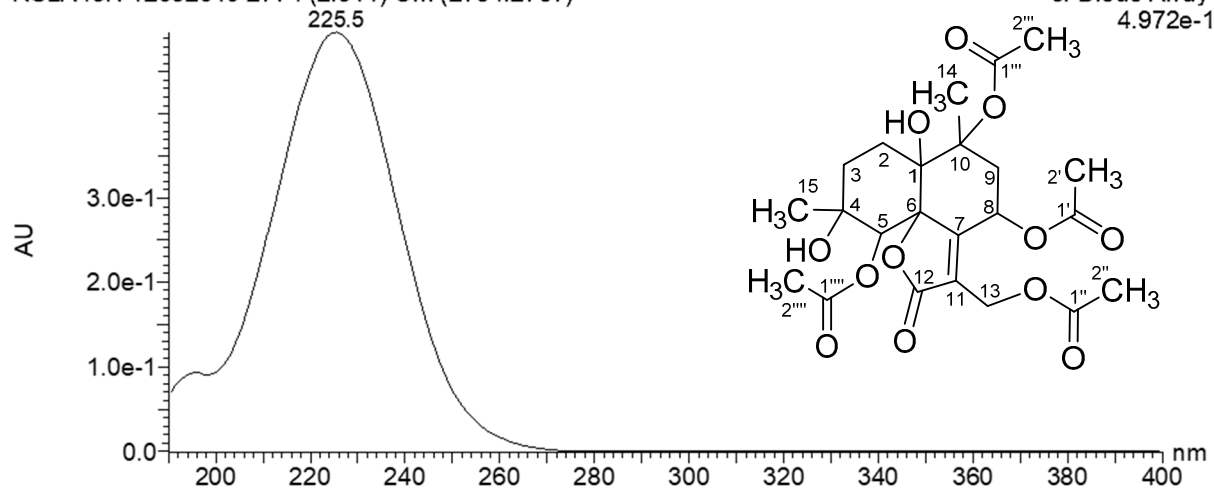

UV spectrum achieved from UPLC-PDA-MS analysis.

**Figure S11** –  $^1\text{H}$  NMR spectrum (300 MHz,  $\text{CDCl}_3$ , 295 K) of semisynthetic derivative **4**.

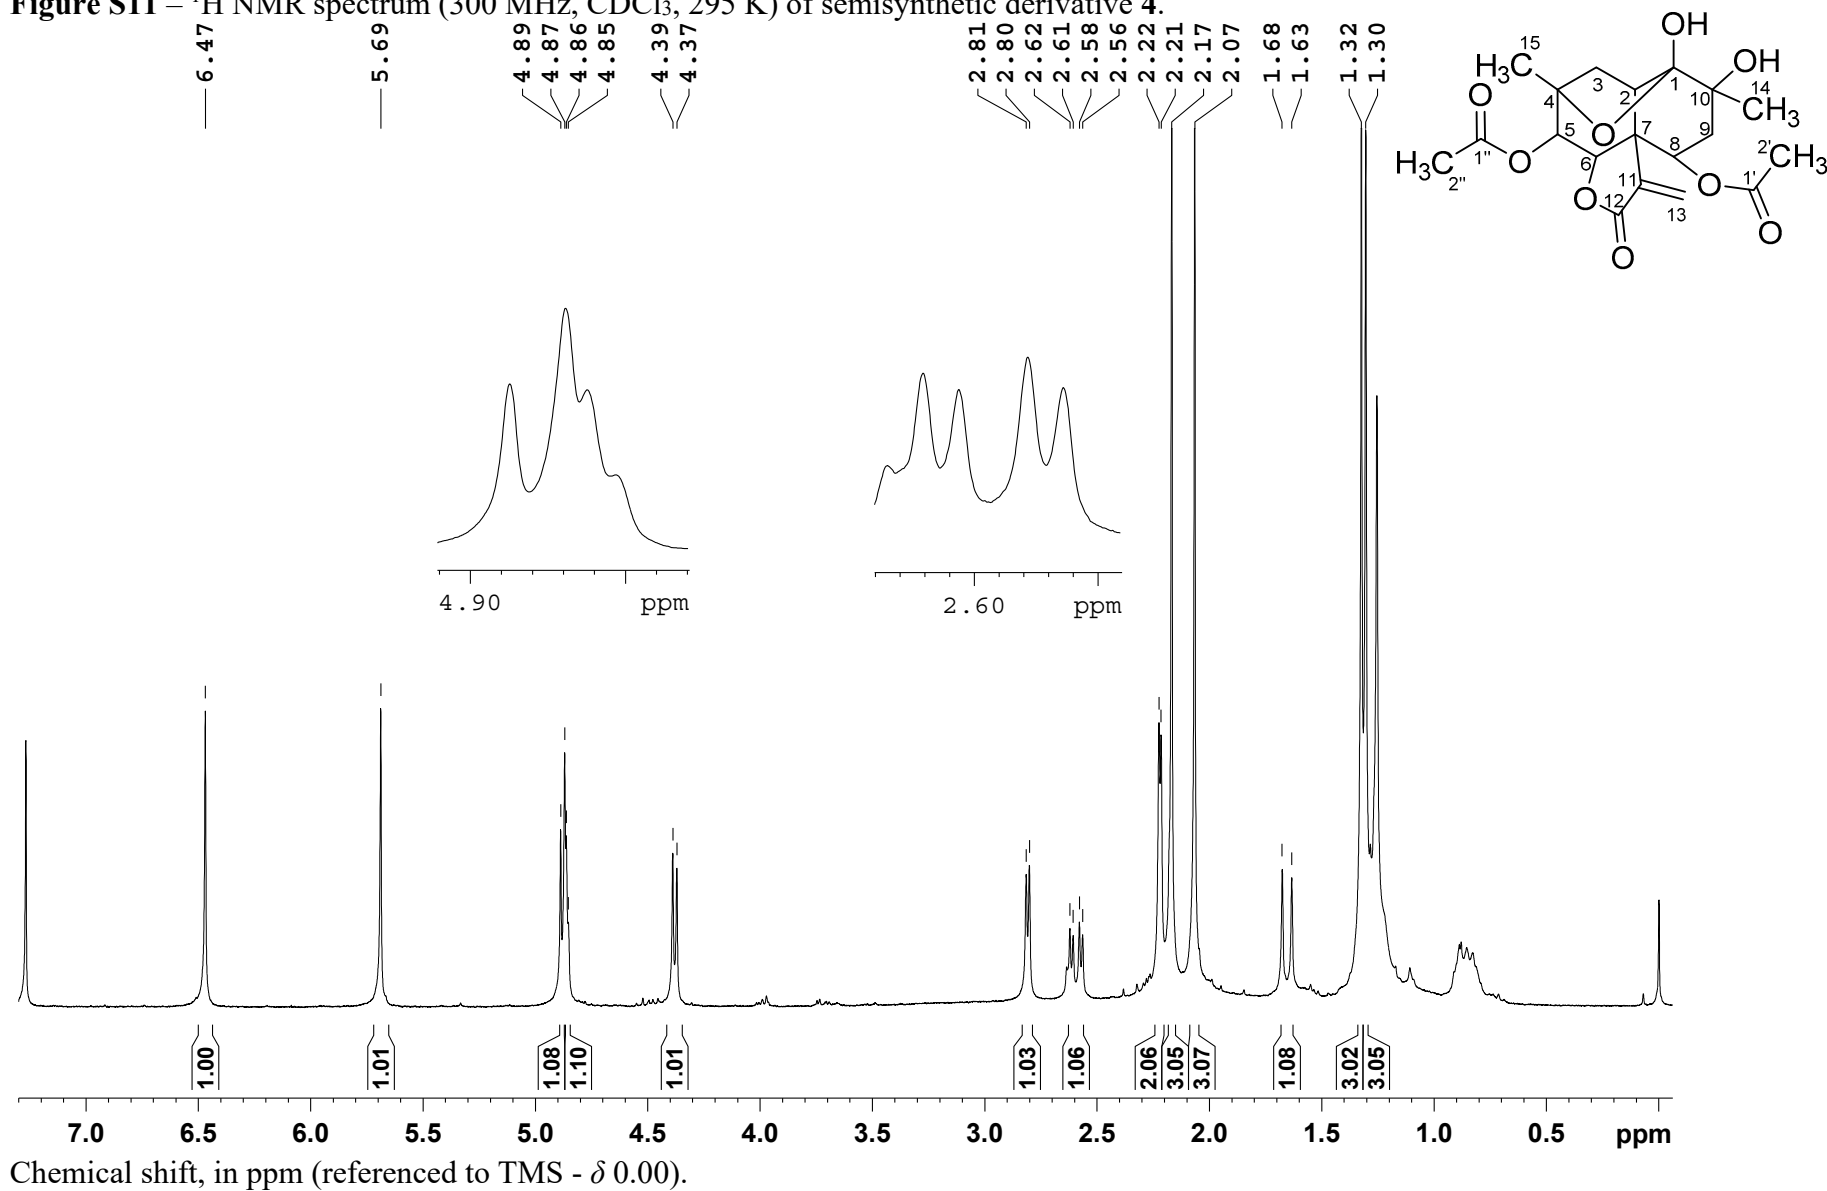



**Figure S12** – HSQC correlation map (CDCl<sub>3</sub>, 295 K) of semisynthetic derivative **4**.

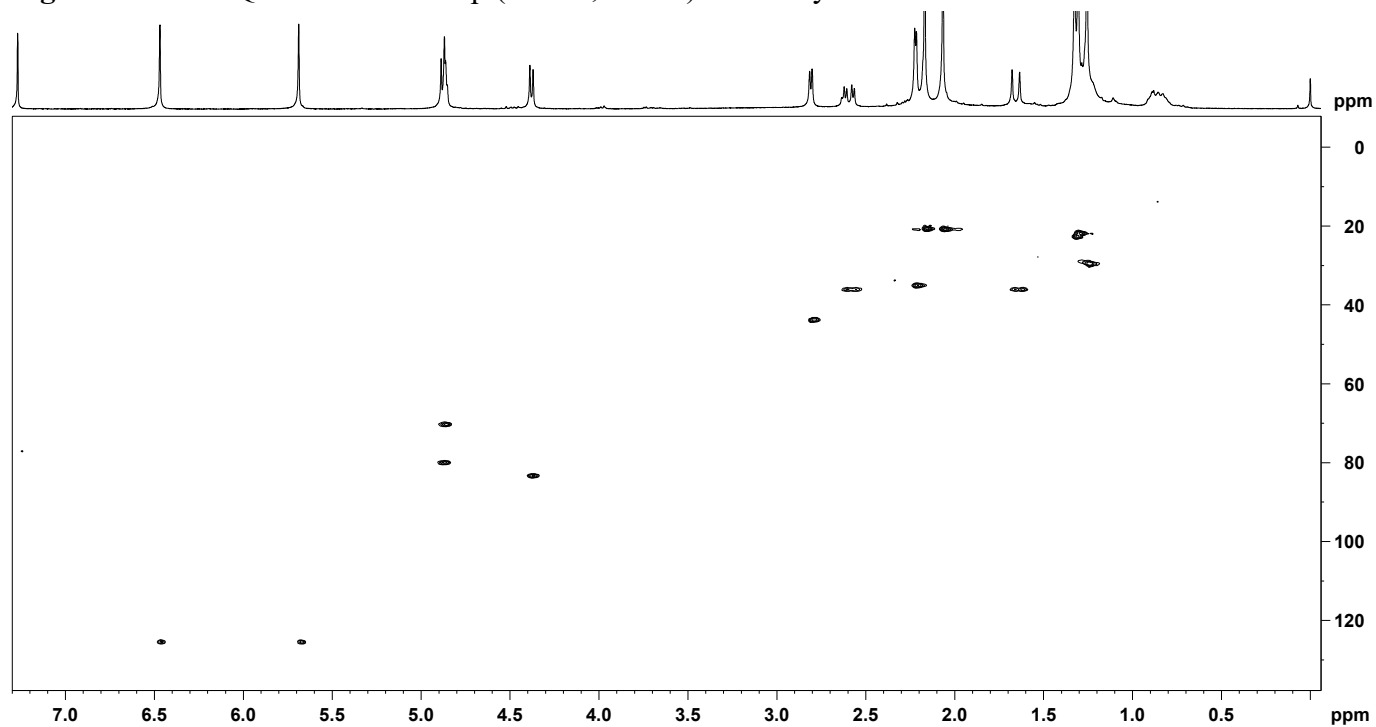

Chemical shift, in ppm (referenced to TMS -  $\delta$  0.00).

**Figure S13** – HMBC correlation map (CDCl<sub>3</sub>, 295 K) of semisynthetic derivative **4**.

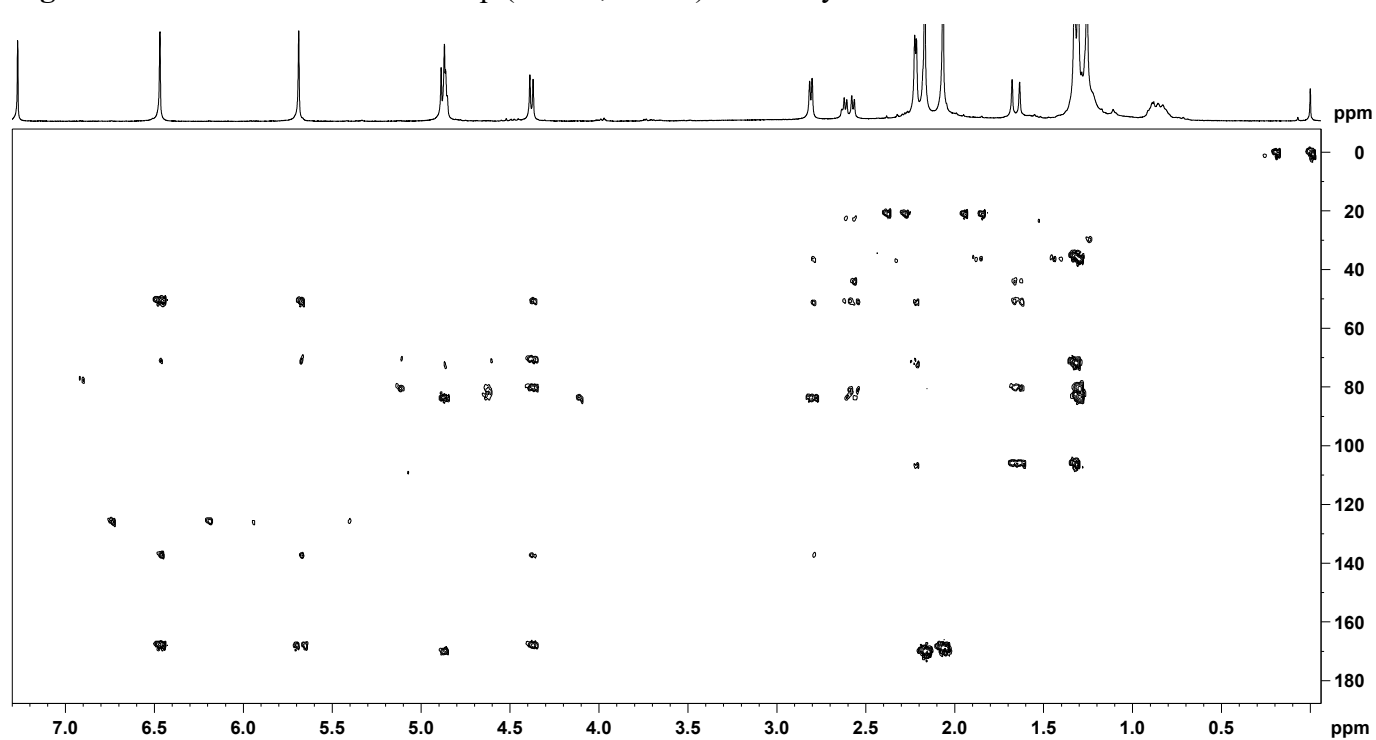

Chemical shift, in ppm (referenced to TMS -  $\delta$  0.00).

**Figure S14** – HRESIMS *full scan* (100-1200 Da) spectrum of semisynthetic derivative **4**.

RSLA24D 20 (0.751) Cm (17:20)

1: TOF MS ES+  
5.78e4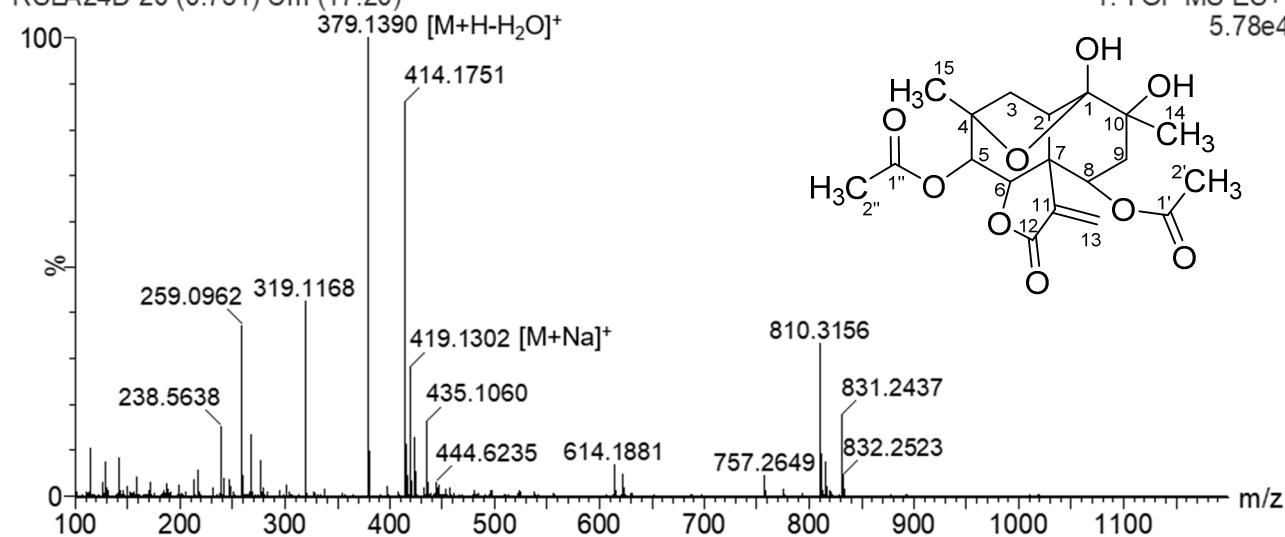

HRESIMS spectrum in positive mode achieved from UPLC-MS analysis.

**Figure S15** – UV spectrum (200-400 nm) of semisynthetic derivative **4**.

RSLA54L 12032019 2548 (2.123) Cm (2535:2560)

3: Diode Array  
2.58e-1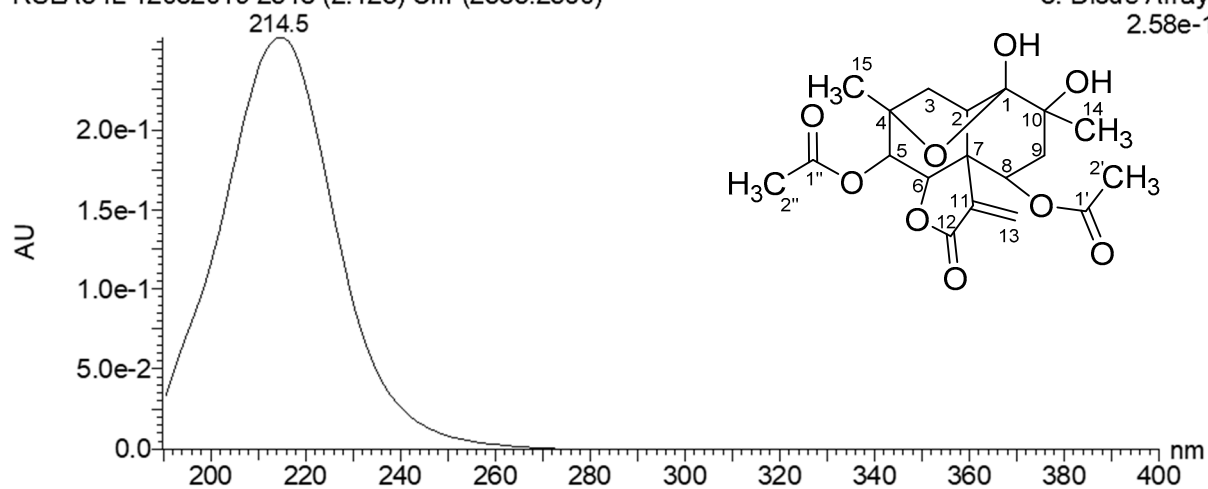

UV spectrum achieved from UPLC-PDA-MS analysis.

**Figure S16** –  $^1\text{H}$  NMR spectrum (300 MHz,  $\text{CDCl}_3$ , 295 K) of semisynthetic derivative **5**.

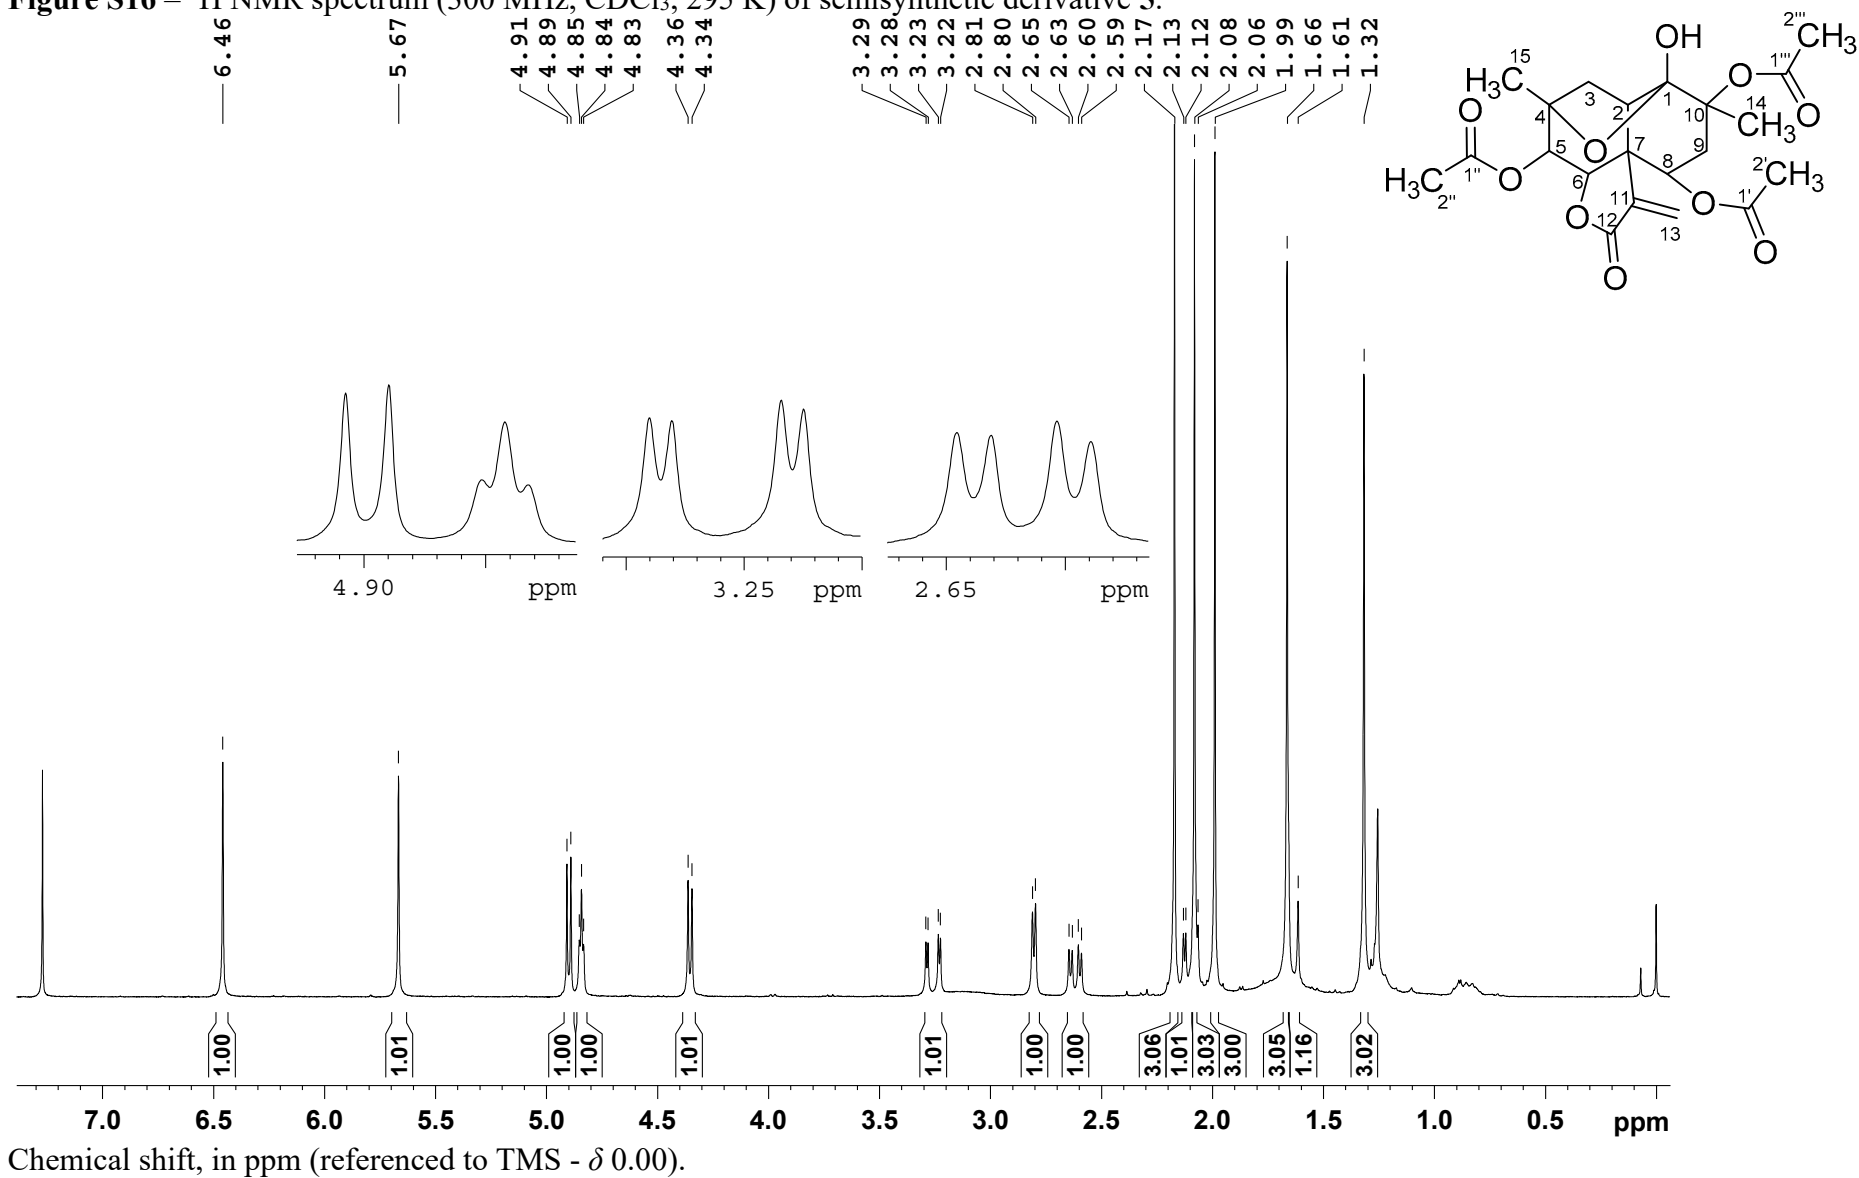

**Figure S17** – HSQC correlation map (CDCl<sub>3</sub>, 295 K) of semisynthetic derivative **5**.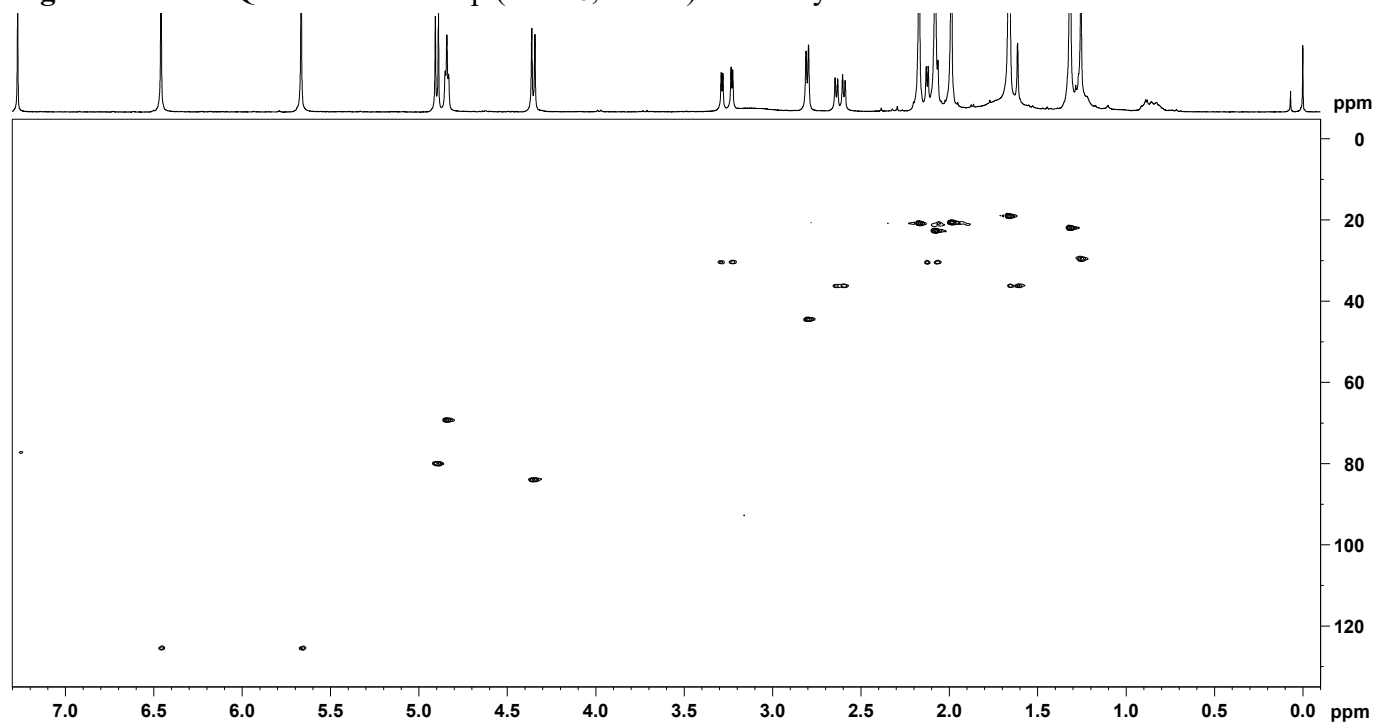

Chemical shift, in ppm (referenced to TMS -  $\delta$  0.00).

**Figure S18** – HMBC correlation map (CDCl<sub>3</sub>, 295 K) of semisynthetic derivative **5**.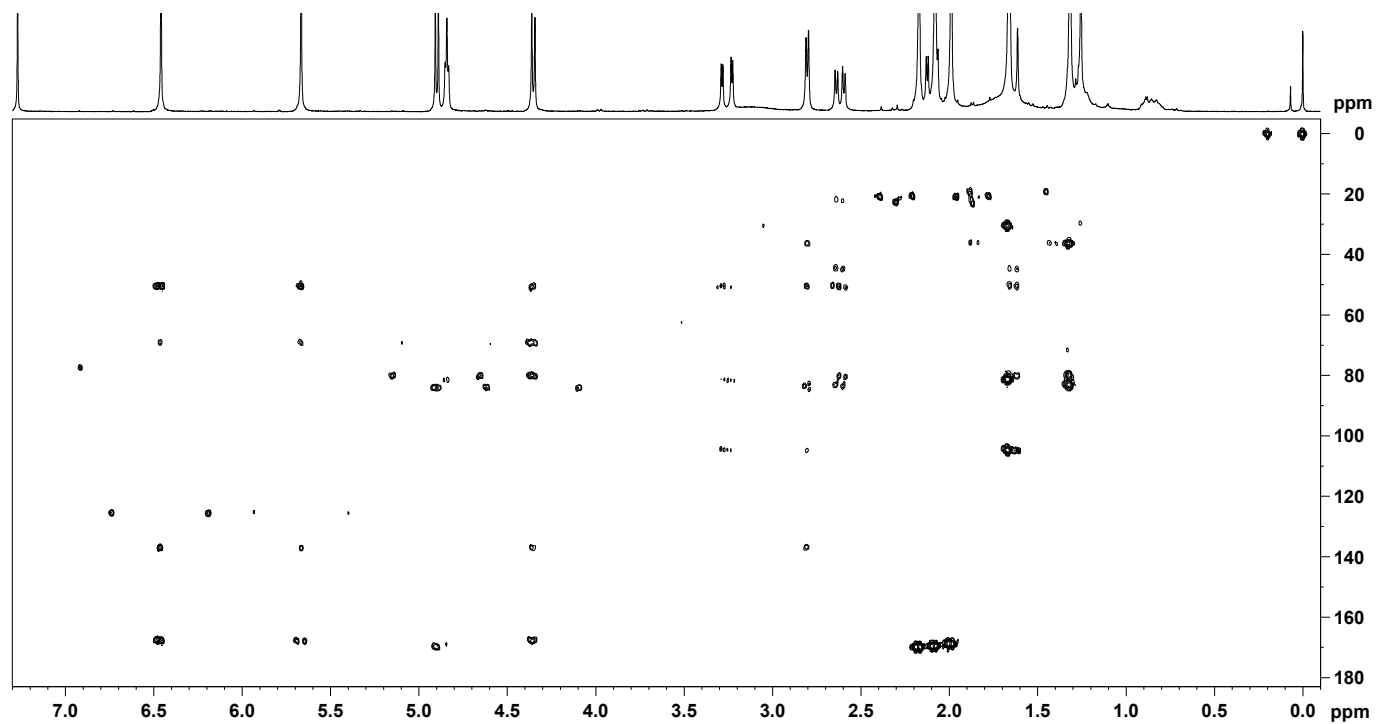

Chemical shift, in ppm (referenced to TMS -  $\delta$  0.00).

**Figure S19** – HRESIMS *full scan* (100-1200 Da) spectrum of semisynthetic derivative **5**.

RSLA54J 12032019 65 (2.402) Cm (64:68-(93:94+92))

1: TOF MS ES+  
9.00e6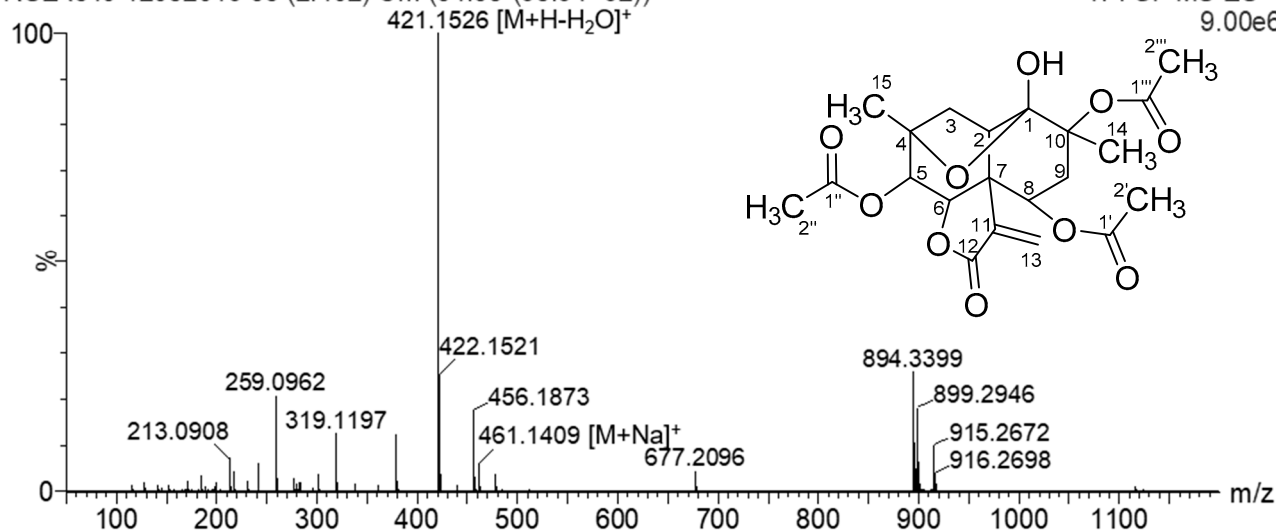

HRESIMS spectrum in positive mode achieved from UPLC-MS analysis.

**Figure S20** – UV spectrum (200-400 nm) of semisynthetic derivative **5**.

RSLA54J 12032019 2858 (2.381) Cm (2848:2867)

3: Diode Array  
9.559e-2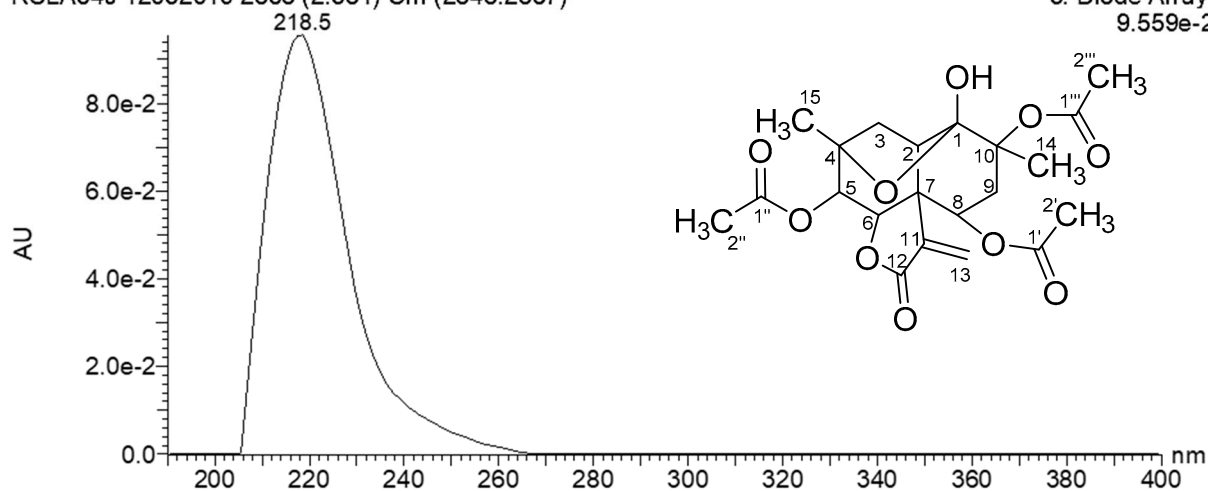

UV spectrum achieved from UPLC-PDA-MS analysis.

**Figure S21** –  $^1\text{H}$  NMR spectrum (300 MHz,  $\text{CDCl}_3$ , 295 K) of semisynthetic derivative **6**.

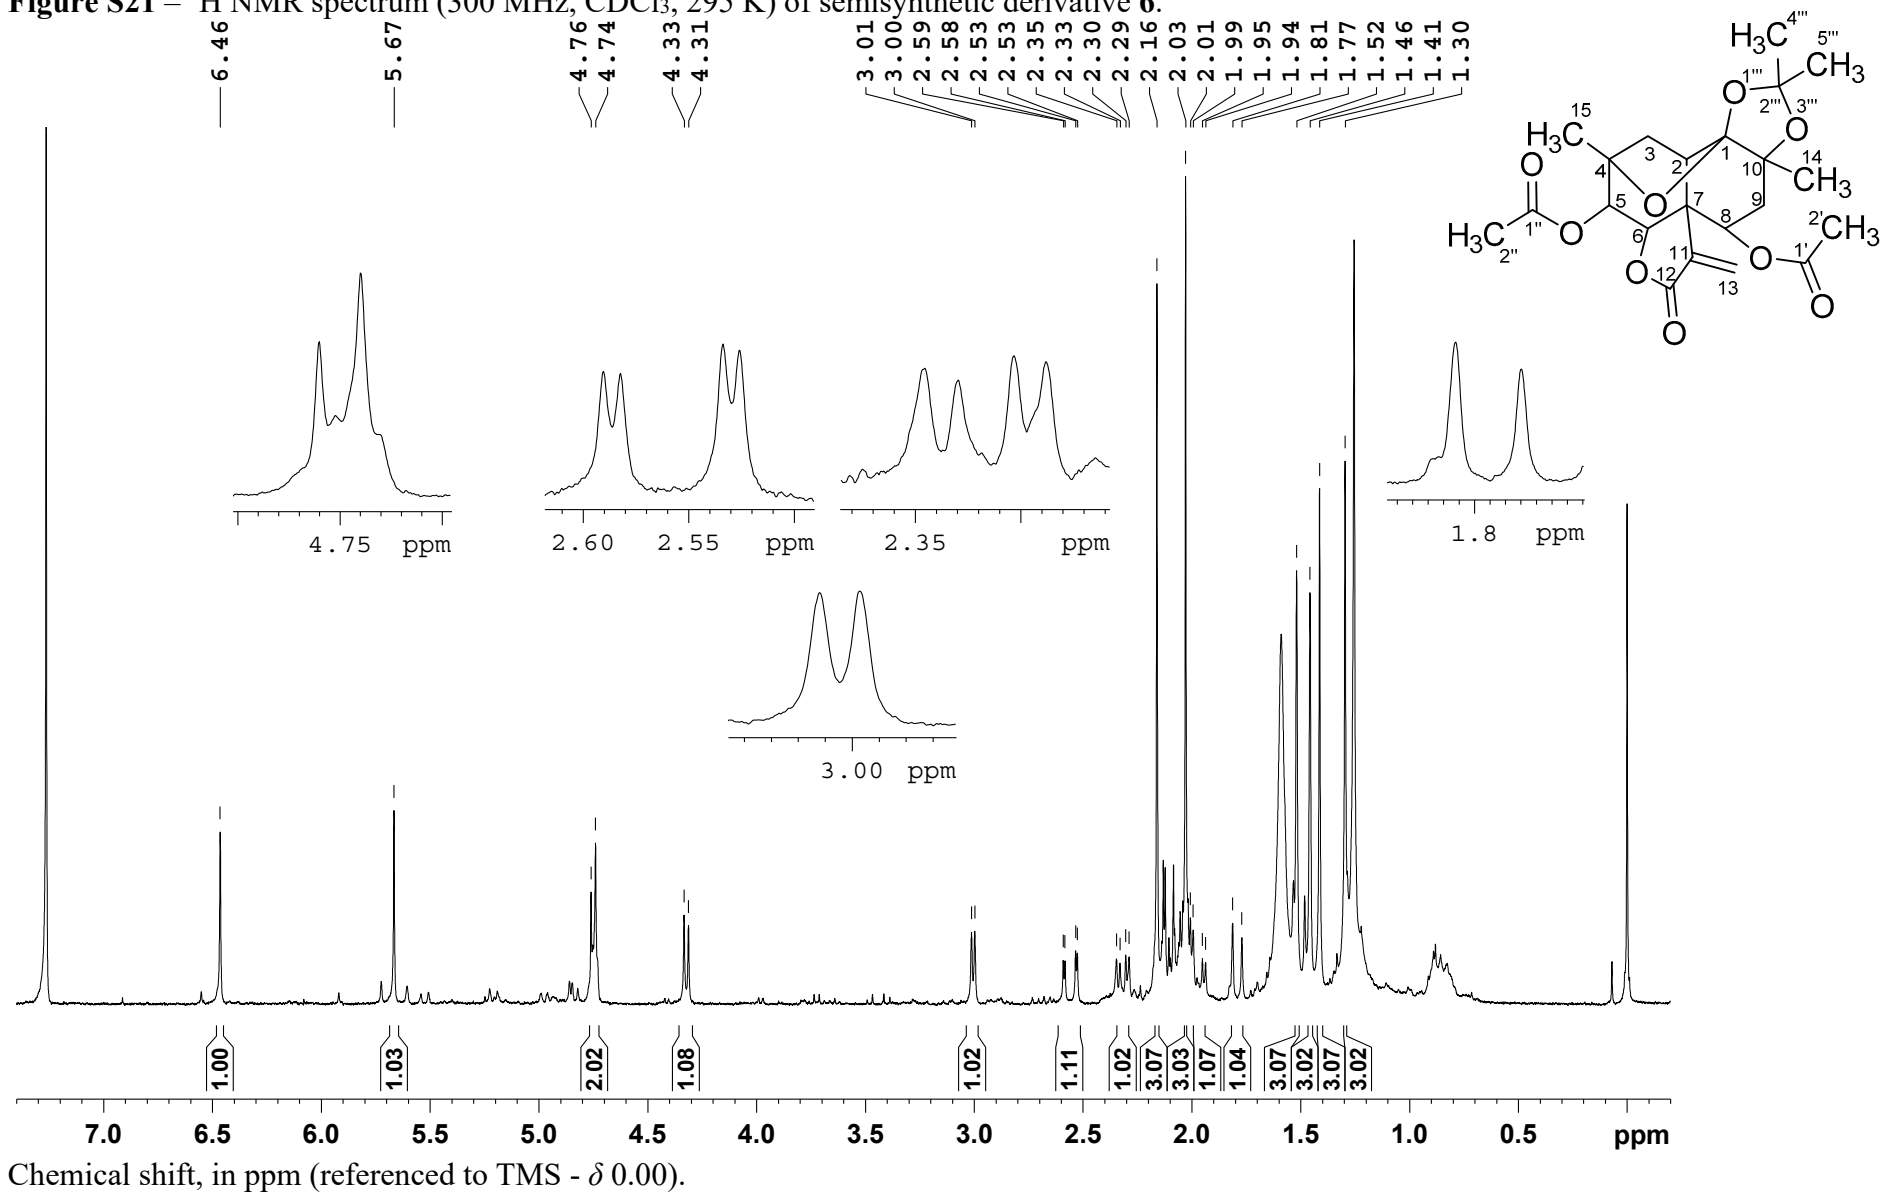

**Figure S22** – HSQC correlation map (CDCl<sub>3</sub>, 295 K) of semisynthetic derivative **6**.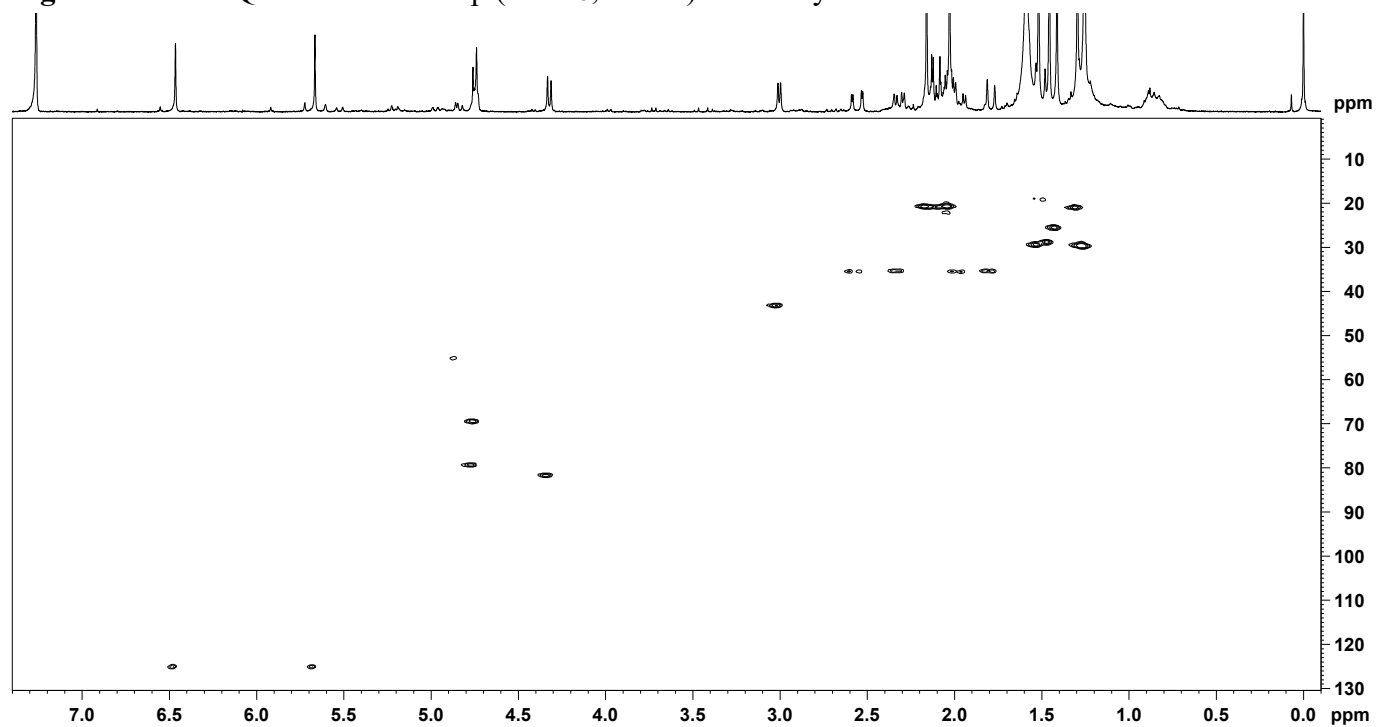

Chemical shift, in ppm (referenced to TMS -  $\delta$  0.00).

**Figure S23** – HMBC correlation map (CDCl<sub>3</sub>, 295 K) of semisynthetic derivative **6**.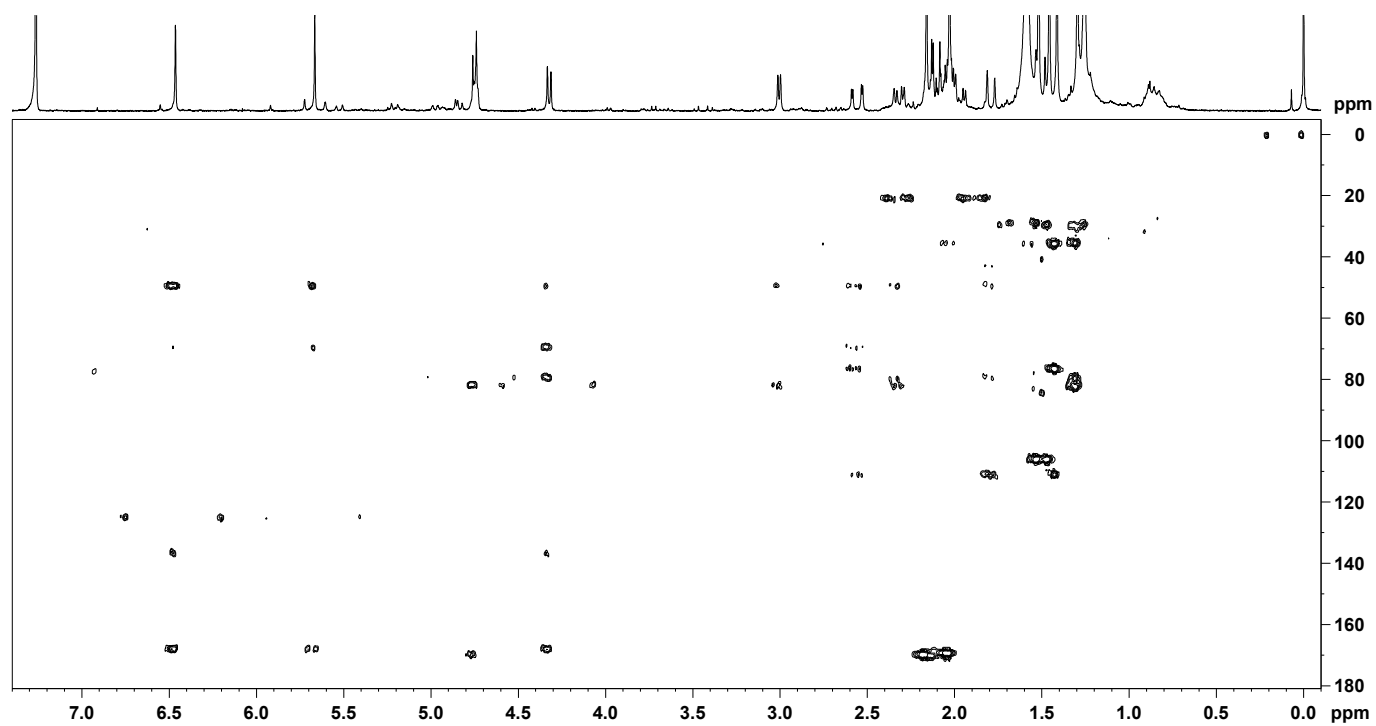

Chemical shift, in ppm (referenced to TMS -  $\delta$  0.00).

**Figure S24** – HRESIMS *full scan* (100-1200 Da) spectrum of semisynthetic derivative **6**.

RSLA54D 12032019 97 (3.576) Cm (96:97)

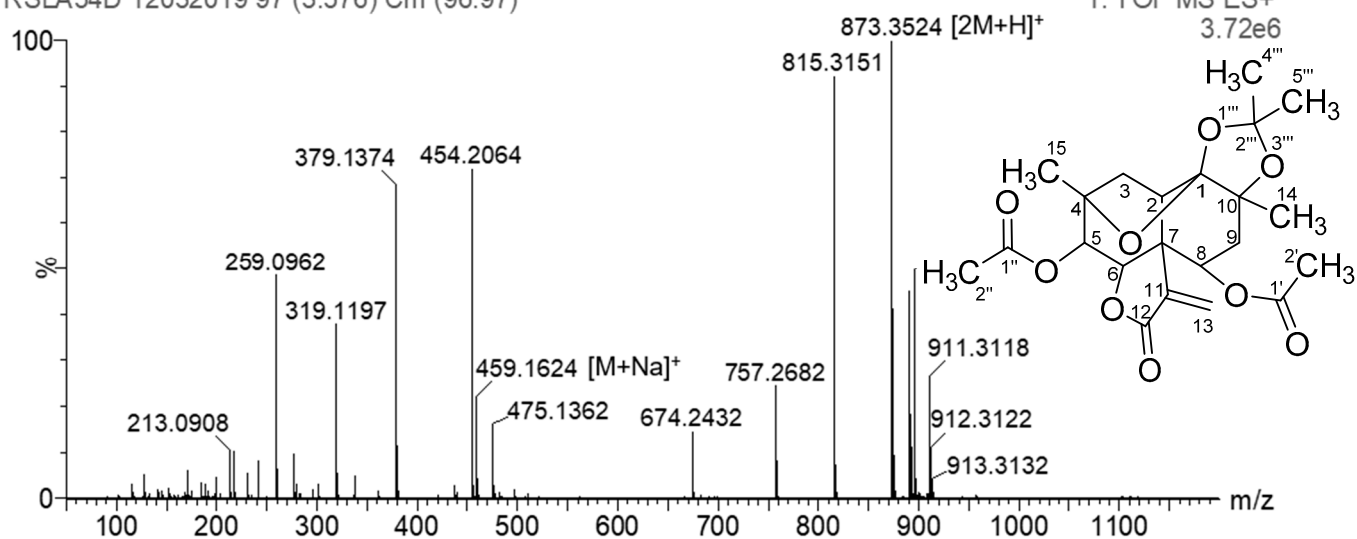

HRESIMS spectrum in positive mode achieved from UPLC-MS analysis.

**Figure S25** – UV spectrum (200-400 nm) of semisynthetic derivative **6**.

RSLA54D 12032019 4249 (3.540) Cm (4238:4261)

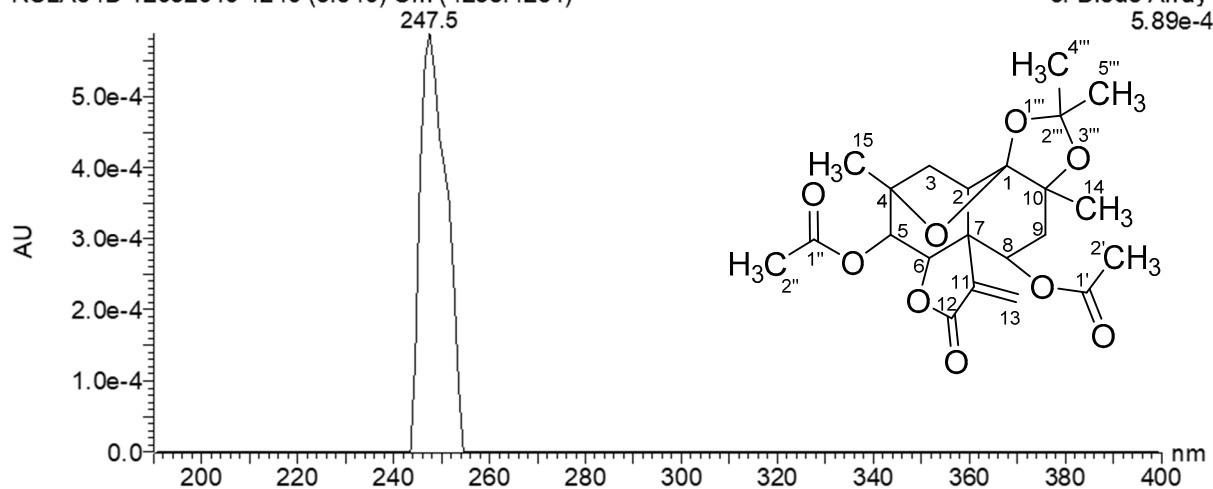

UV spectrum achieved from UPLC-PDA-MS analysis.



**Figure S26** –  $^1\text{H}$  NMR spectrum (300 MHz,  $\text{CDCl}_3$ , 295 K) of semisynthetic derivative **7**.

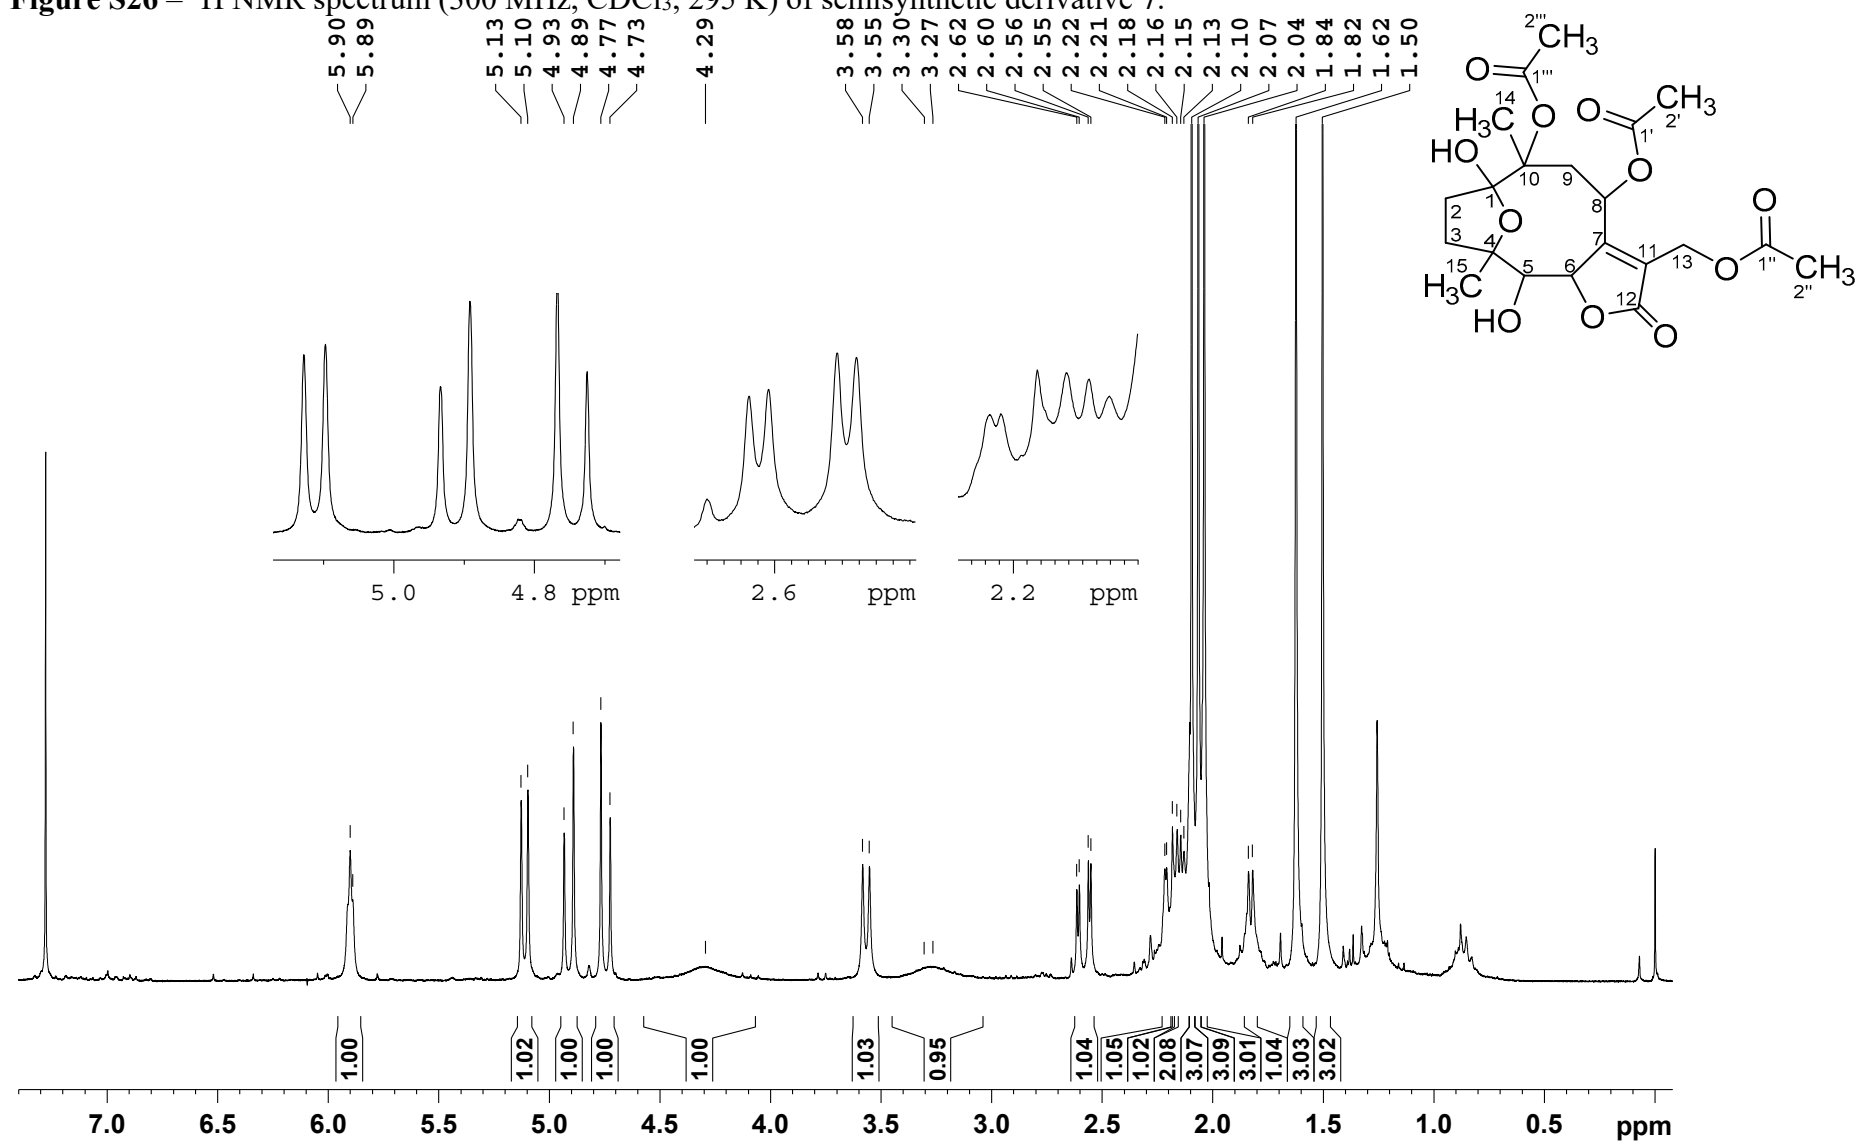

**Figure S27** – HSQC correlation map (CDCl<sub>3</sub>, 295 K) of semisynthetic derivative 7.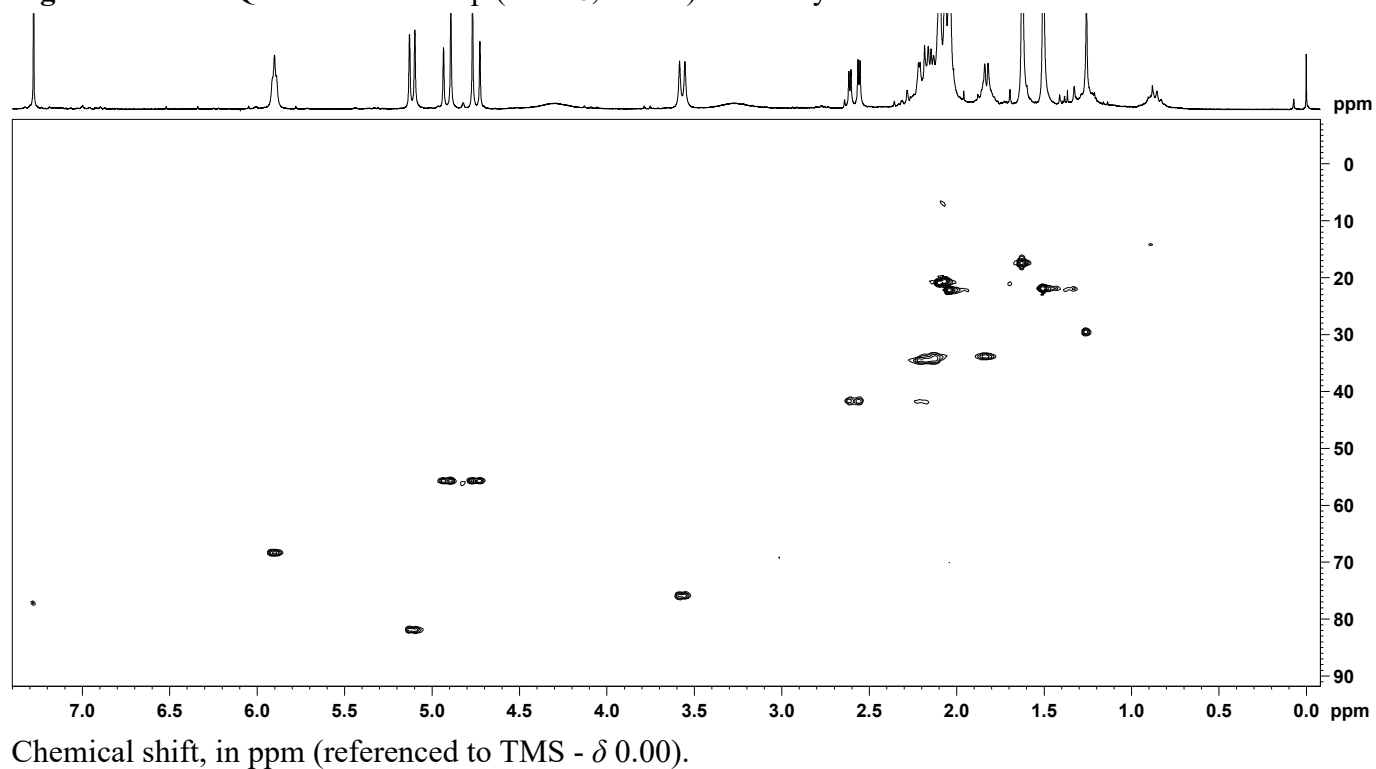**Figure S28** – HMBC correlation map (CDCl<sub>3</sub>, 295 K) of semisynthetic derivative 7.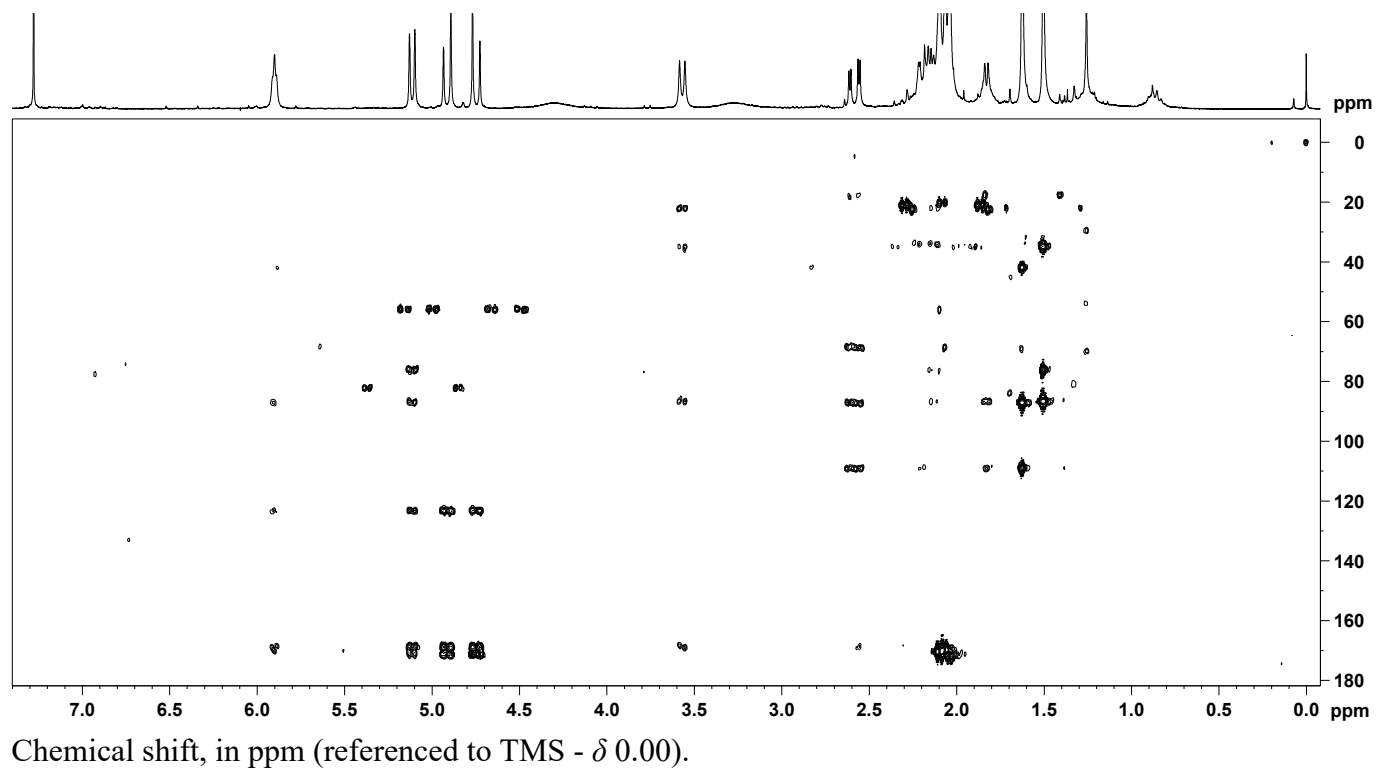

**Figure S29** – HRESIMS *full scan* (100-1200 Da) spectrum of semisynthetic derivative **7**.

RSLA40E\_27092017 34 (1.265) Cm (32:34)

1: TOF MS ES+  
3.63e6

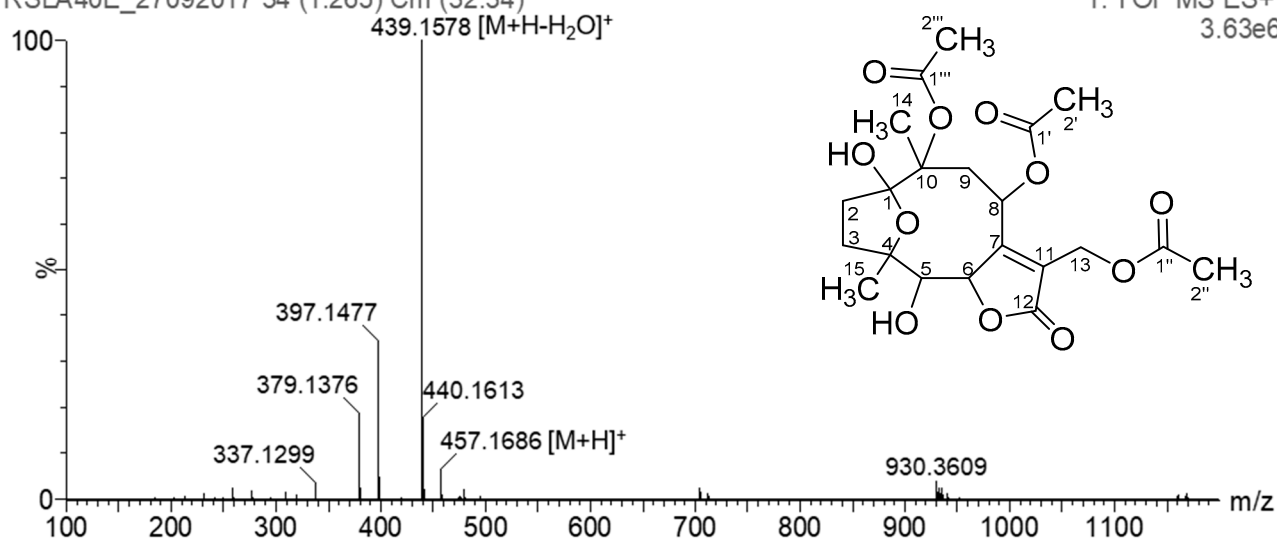

HRESIMS spectrum in positive mode achieved from UPLC-MS analysis.

**Figure S30** –  $^1\text{H}$  NMR spectrum (300 MHz,  $\text{CDCl}_3$ , 295 K) of semisynthetic derivative **8**.

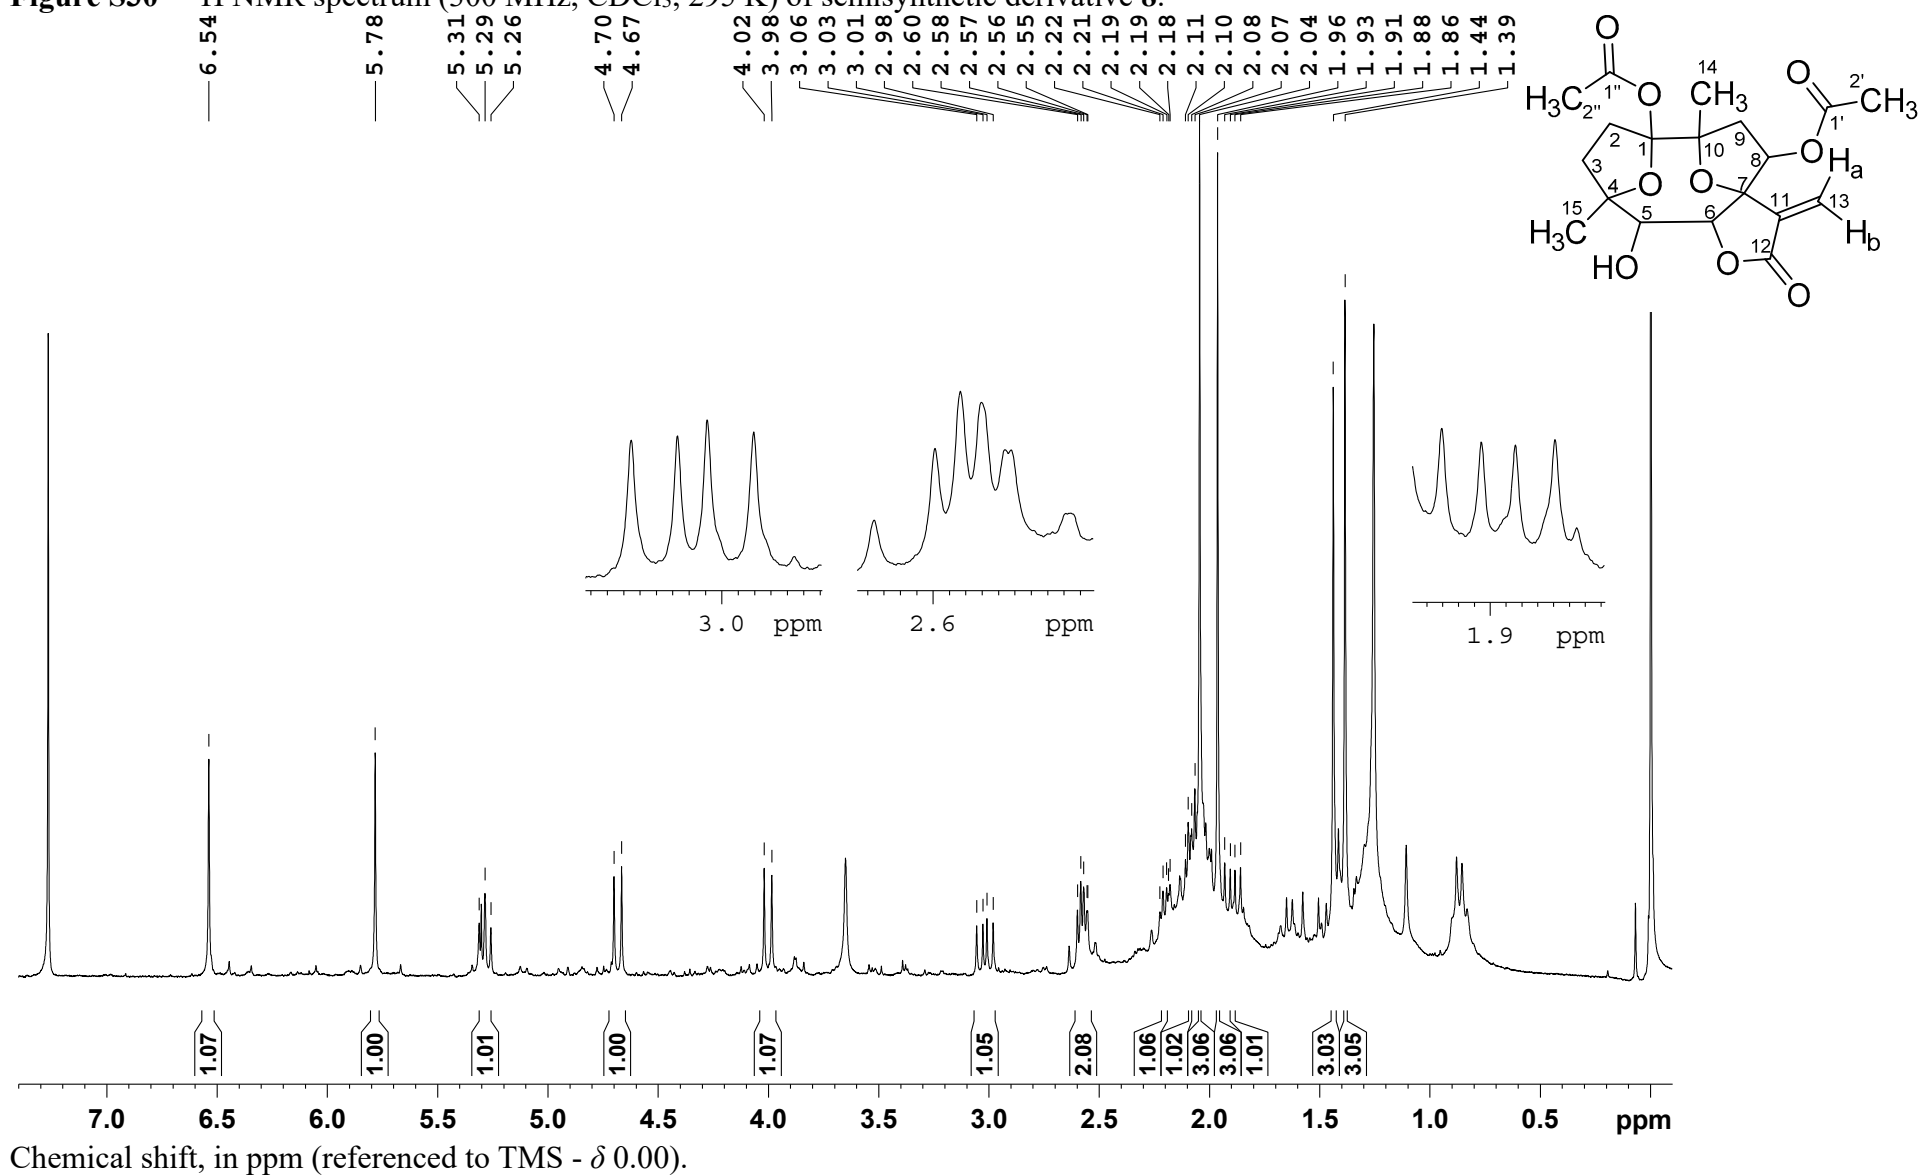

**Figure S31** – HSQC correlation map (CDCl<sub>3</sub>, 295 K) of semisynthetic derivative **8**.

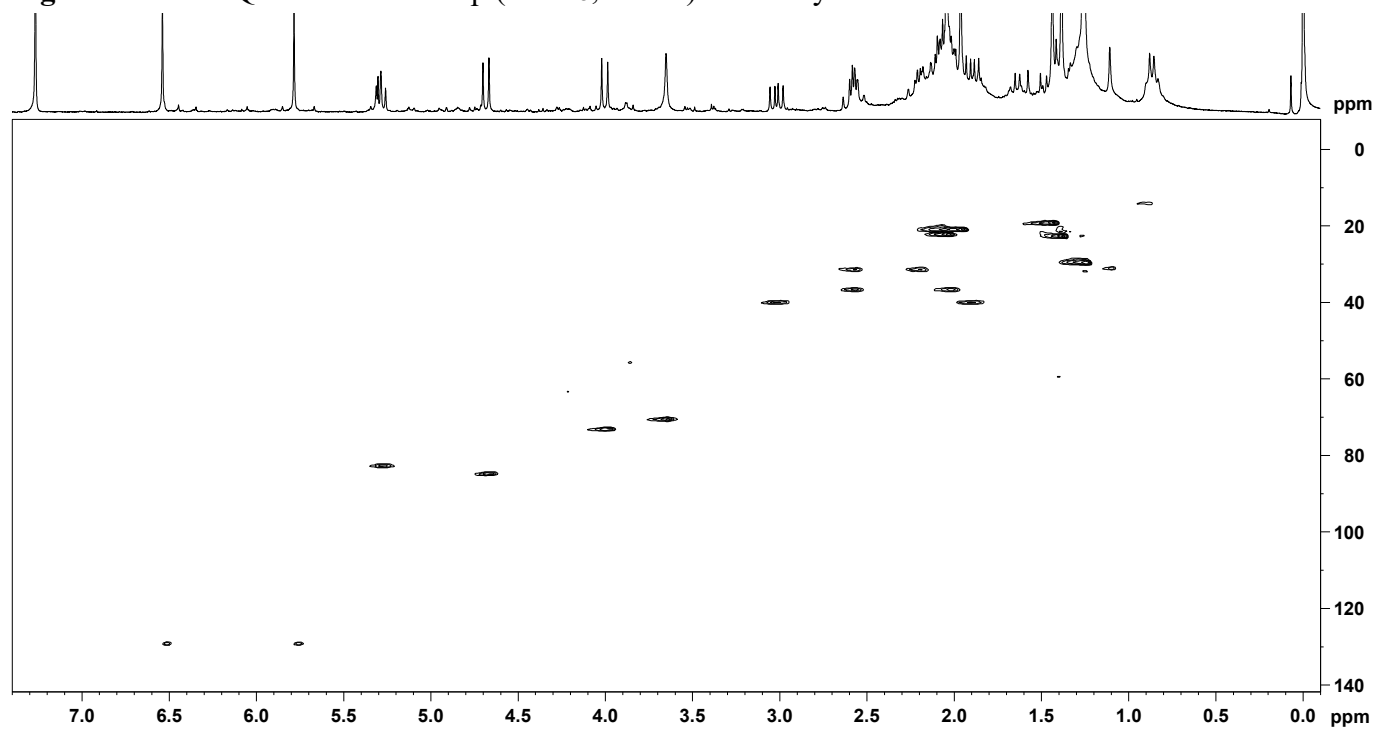

Chemical shift, in ppm (referenced to TMS -  $\delta$  0.00).

**Figure S32** – HMBC correlation map (CDCl<sub>3</sub>, 295 K) of semisynthetic derivative **8**.

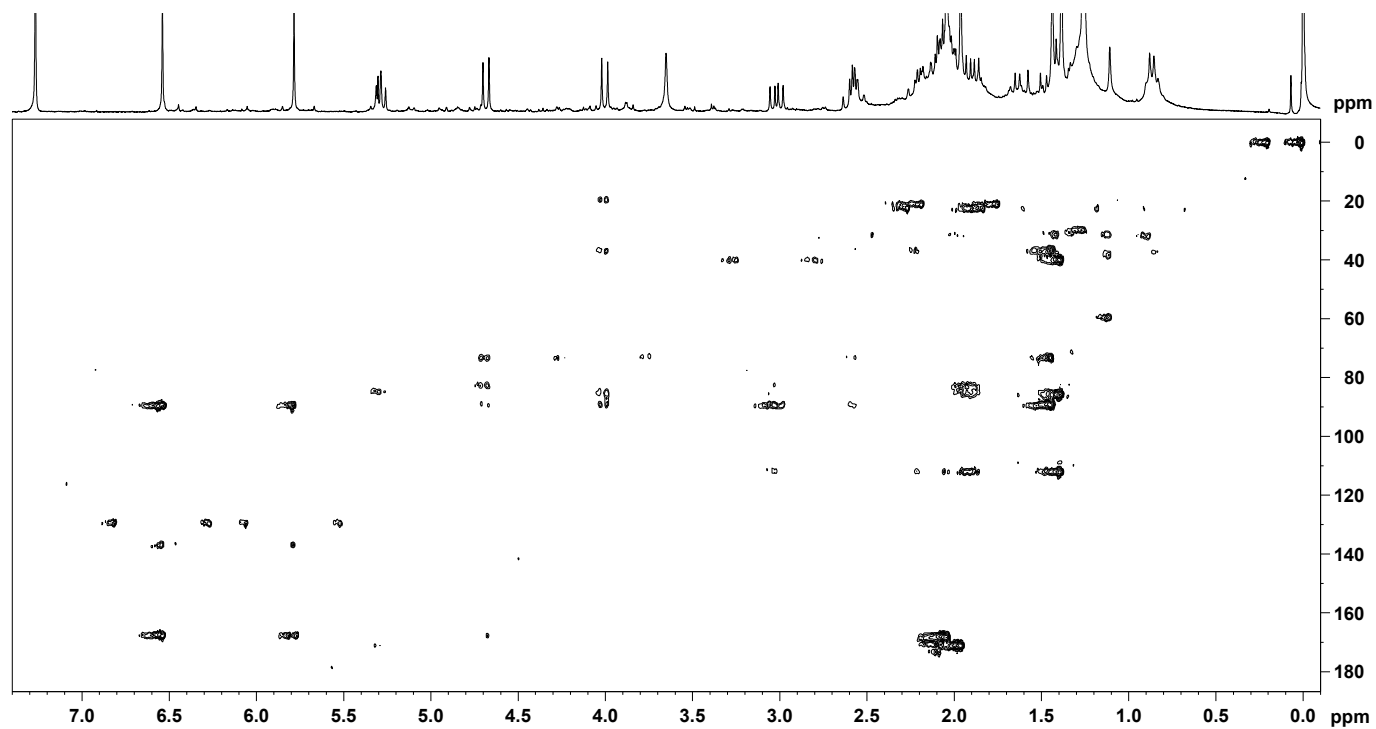

Chemical shift, in ppm (referenced to TMS -  $\delta$  0.00).



**Figure S35** –  $^1\text{H}$  NMR spectrum (300 MHz,  $\text{CDCl}_3$ , 295 K) of semisynthetic derivative **9**.

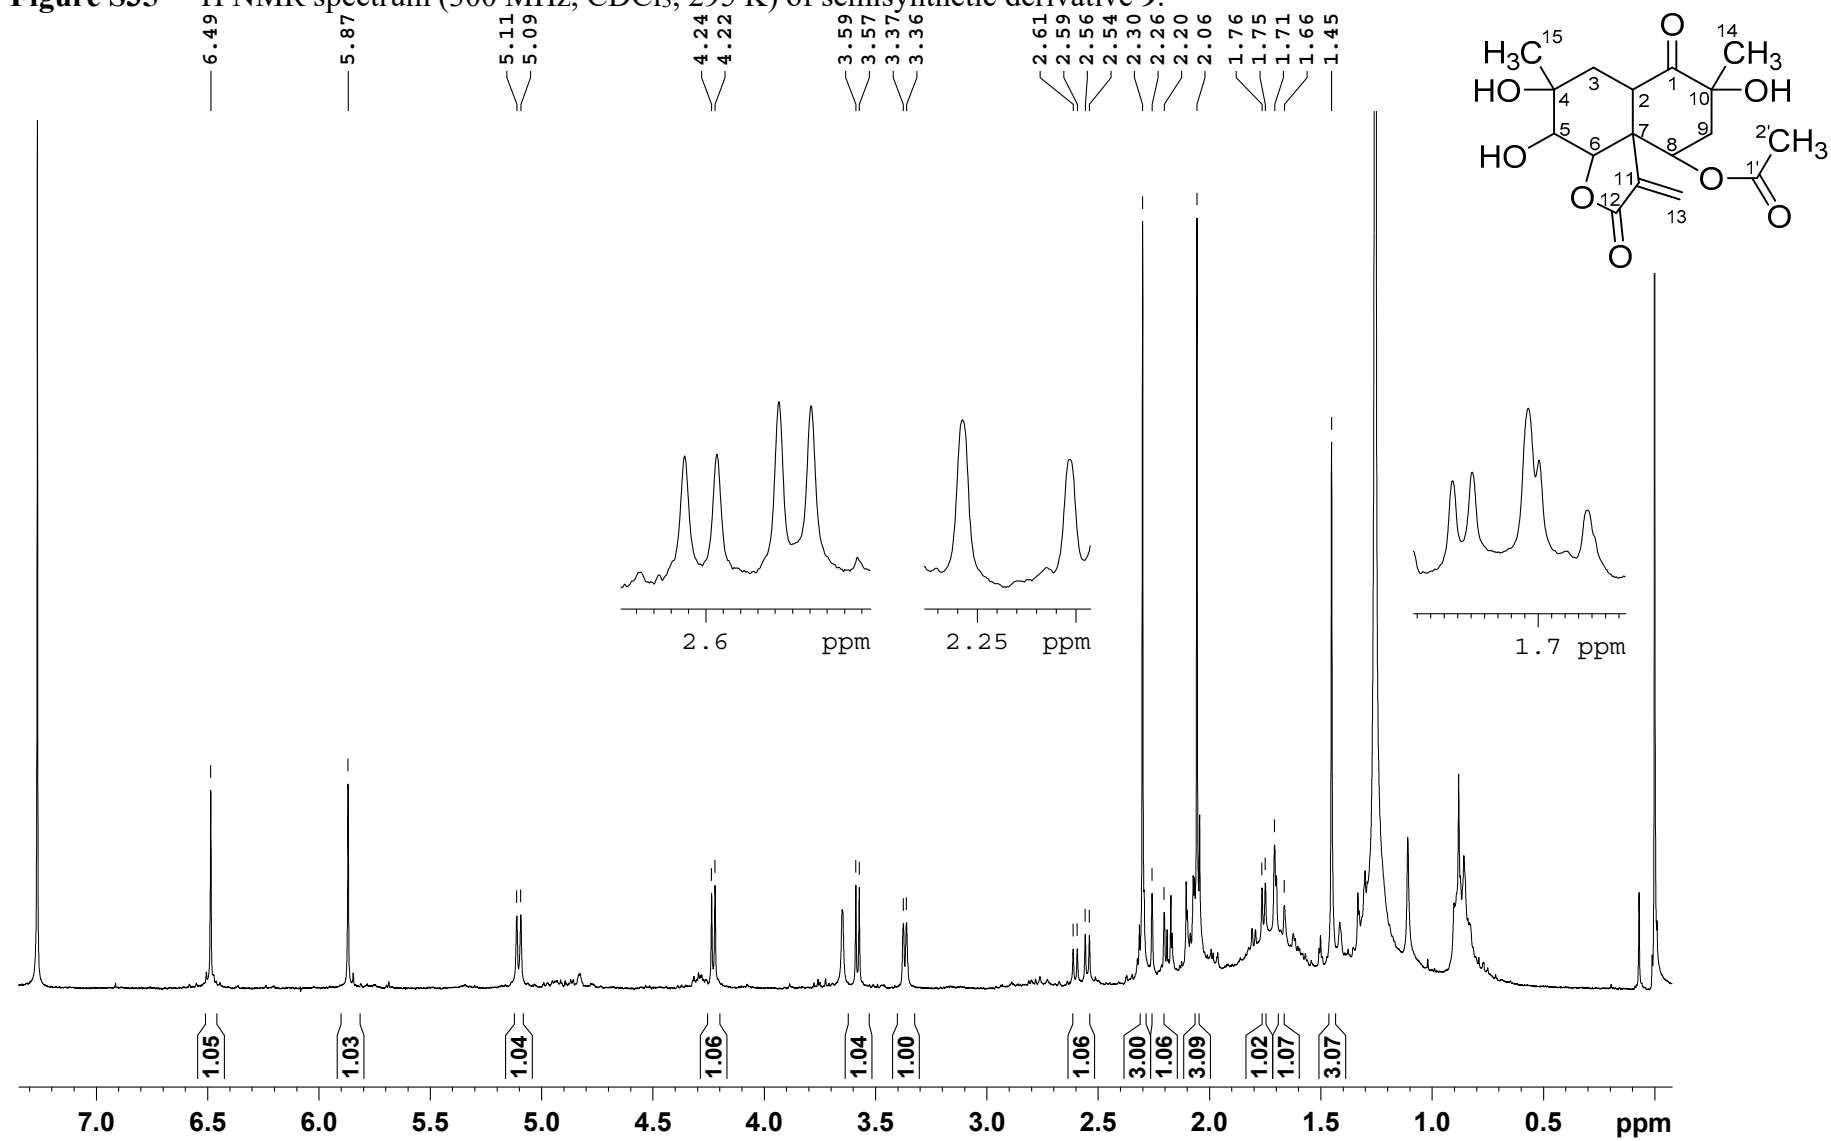

**Figure S36** – HSQC correlation map (CDCl<sub>3</sub>, 295 K) of semisynthetic derivative **9**.

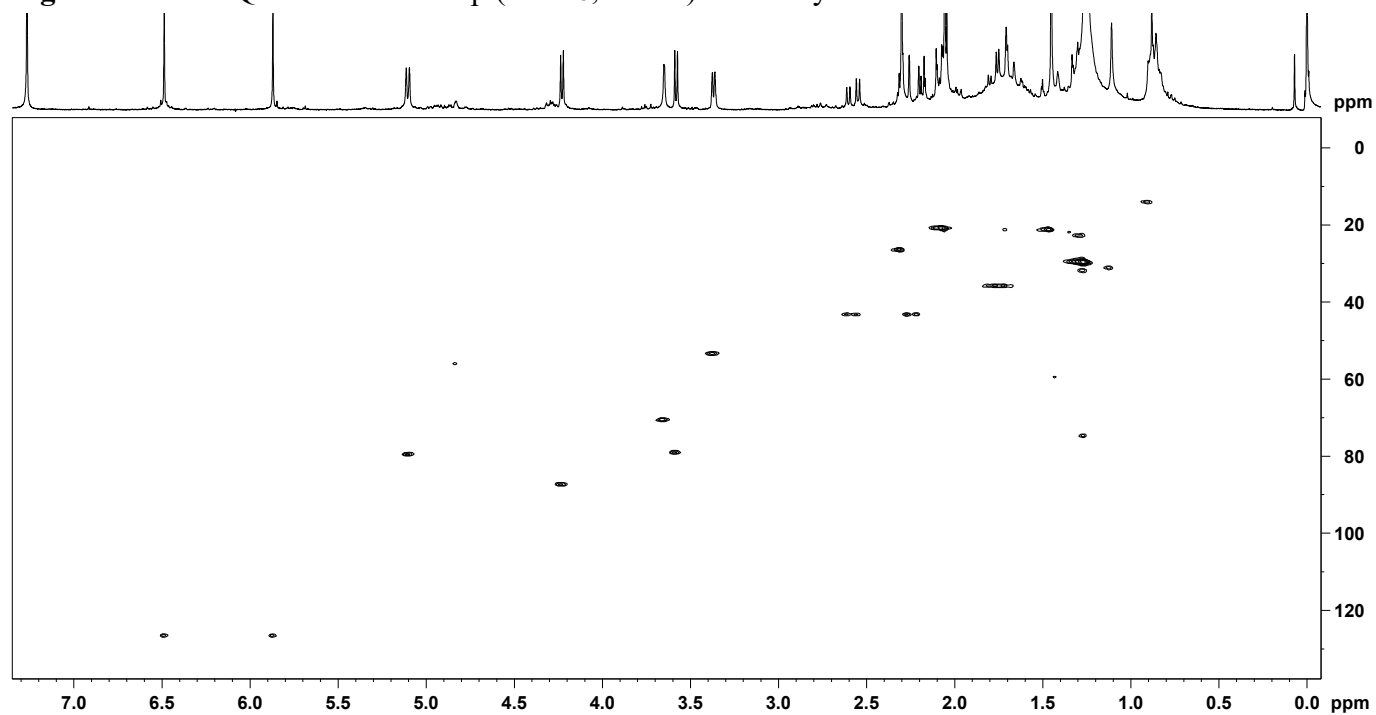

Chemical shift, in ppm (referenced to TMS -  $\delta$  0.00).

**Figure S37** – HMBC correlation map (CDCl<sub>3</sub>, 295 K) of semisynthetic derivative **9**.

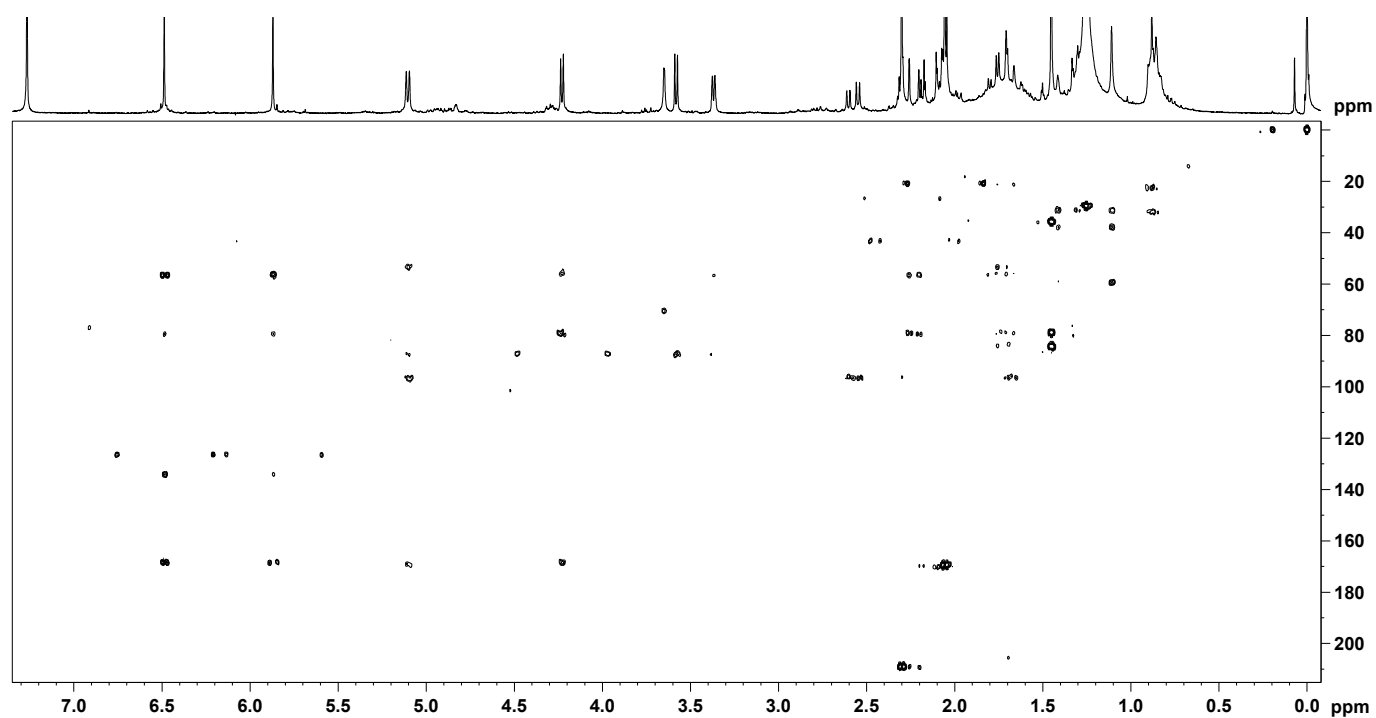

Chemical shift, in ppm (referenced to TMS -  $\delta$  0.00).



**Figure S38** – HRESIMS *full scan* (100-1200 Da) spectrum of semisynthetic derivative **9**.

RSLA90A 12032019 58 (2.145) Cm (57:58)

1: TOF MS ES+  
6.26e4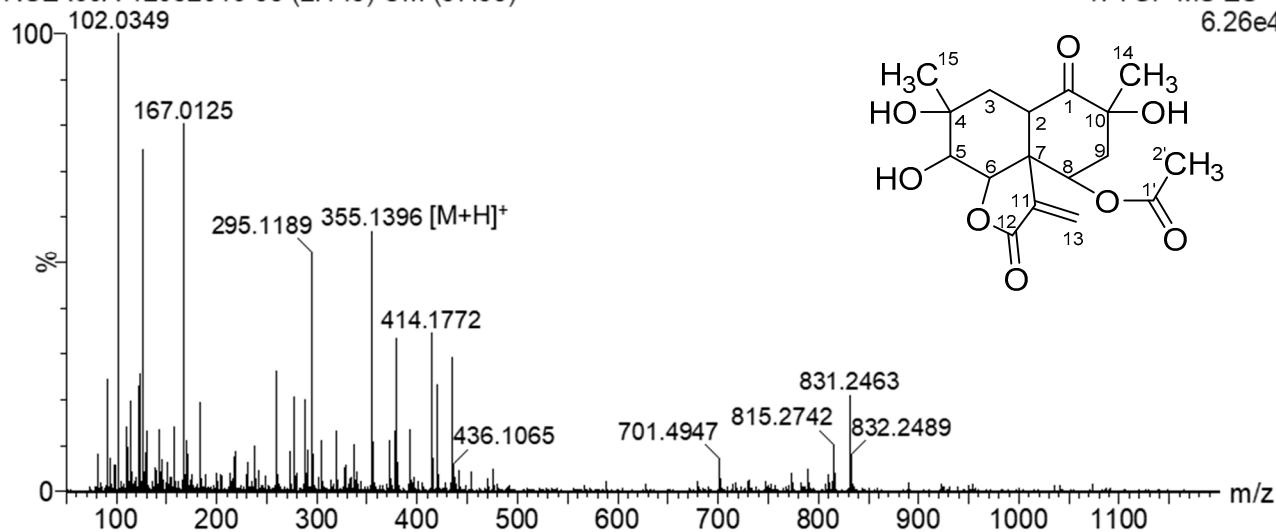

HRESIMS spectrum in positive mode achieved from UPLC-MS analysis.

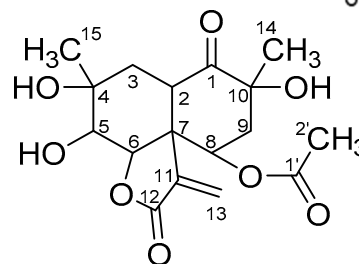**Figure S39** – UV spectrum (200-400 nm) of semisynthetic derivative **9**.

RSLA90A 12032019 2597 (2.163) Cm (2579:2615)

3: Diode Array  
4.339e-2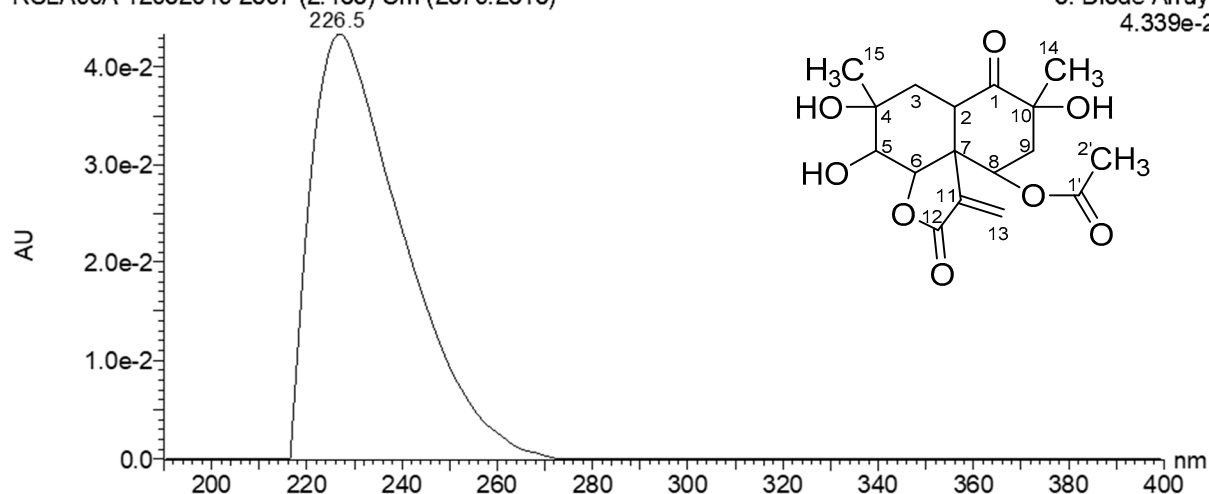

UV spectrum achieved from UPLC-PDA-MS analysis.

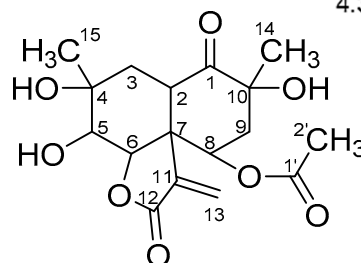

**Figure S40** –  $^1\text{H}$  NMR spectrum (300 MHz,  $\text{CDCl}_3$ , 308 K) of semisynthetic derivative **7a**.

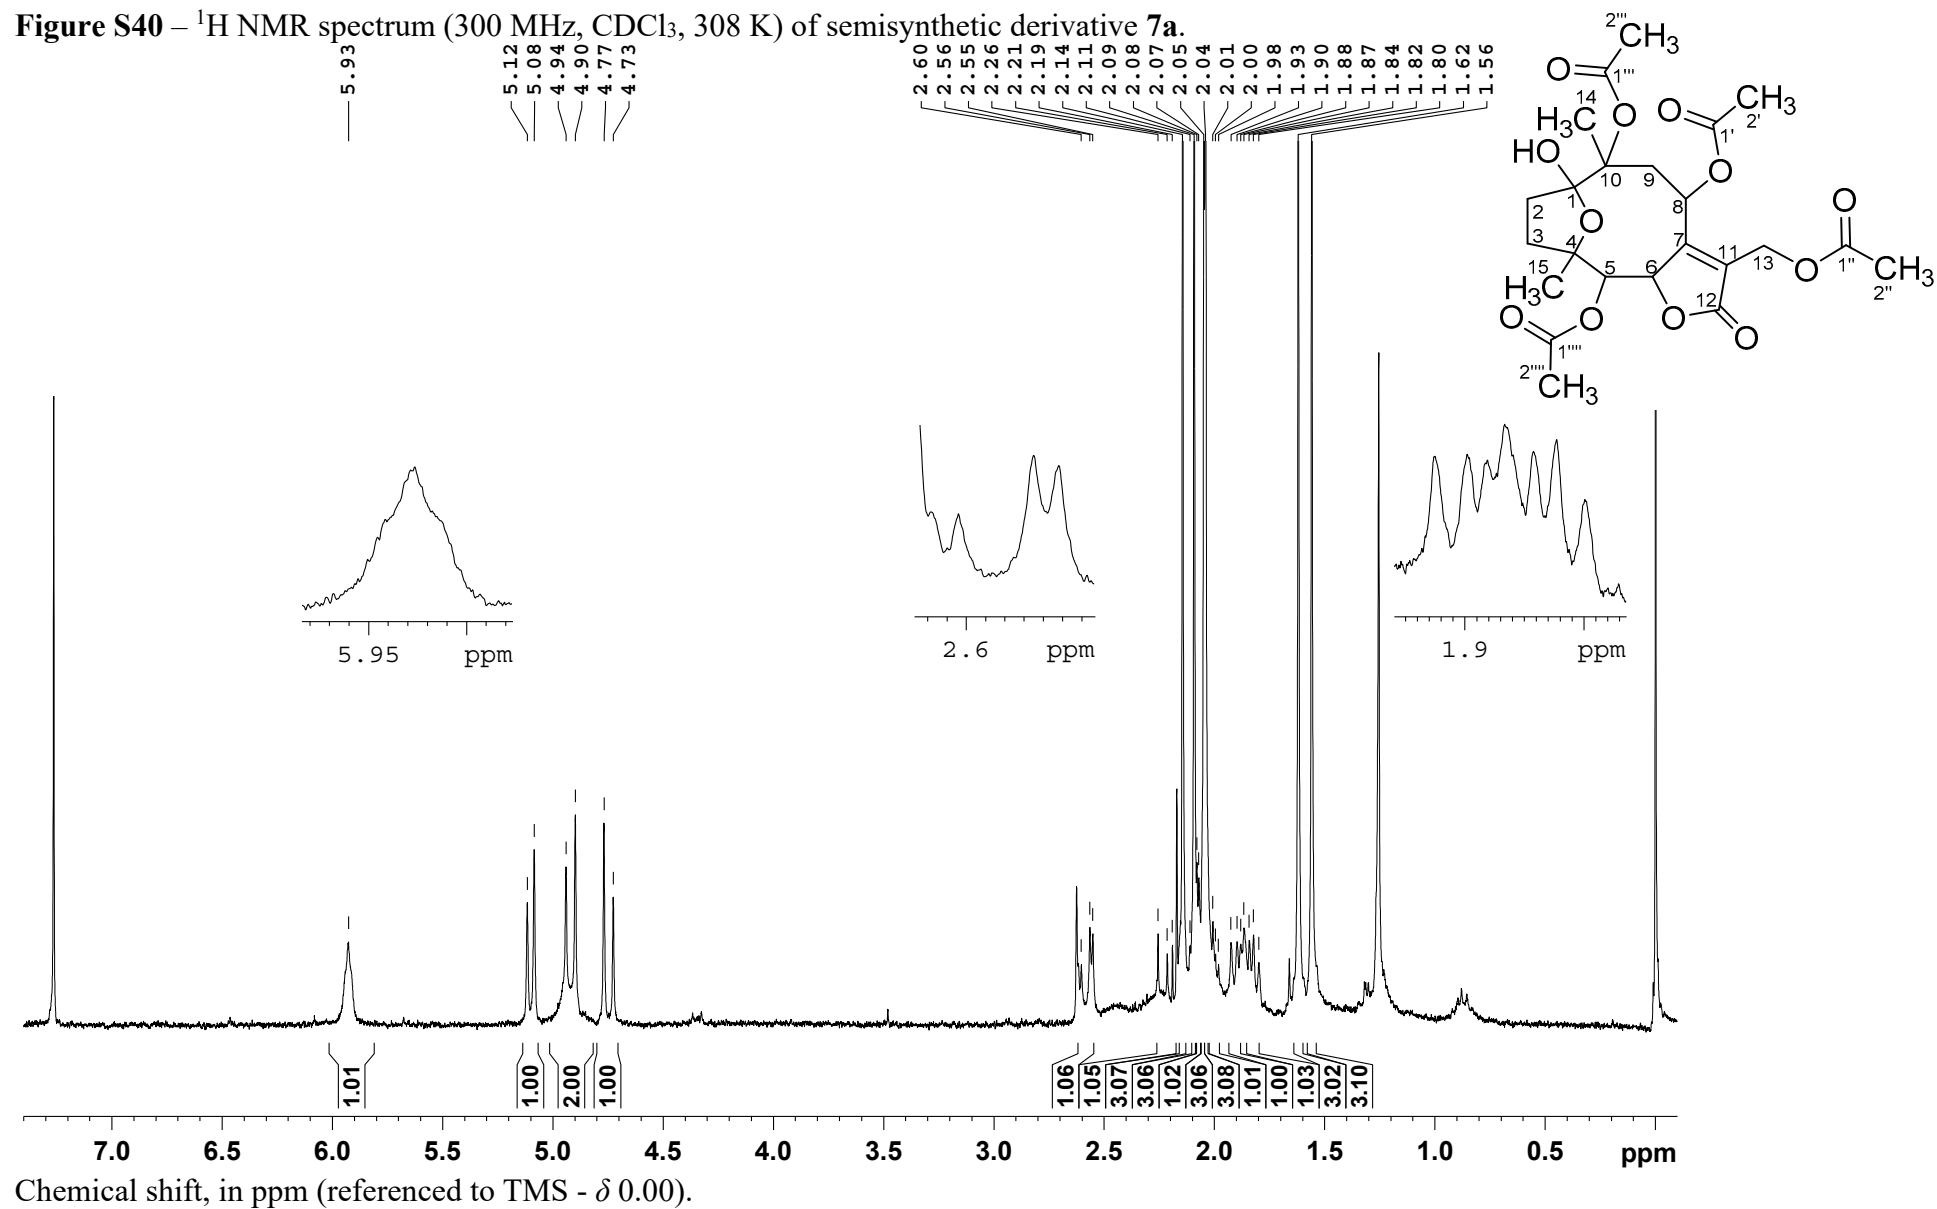

**Figure S41** – HSQC correlation map (CDCl<sub>3</sub>, 308 K) of semisynthetic derivative **7a**.

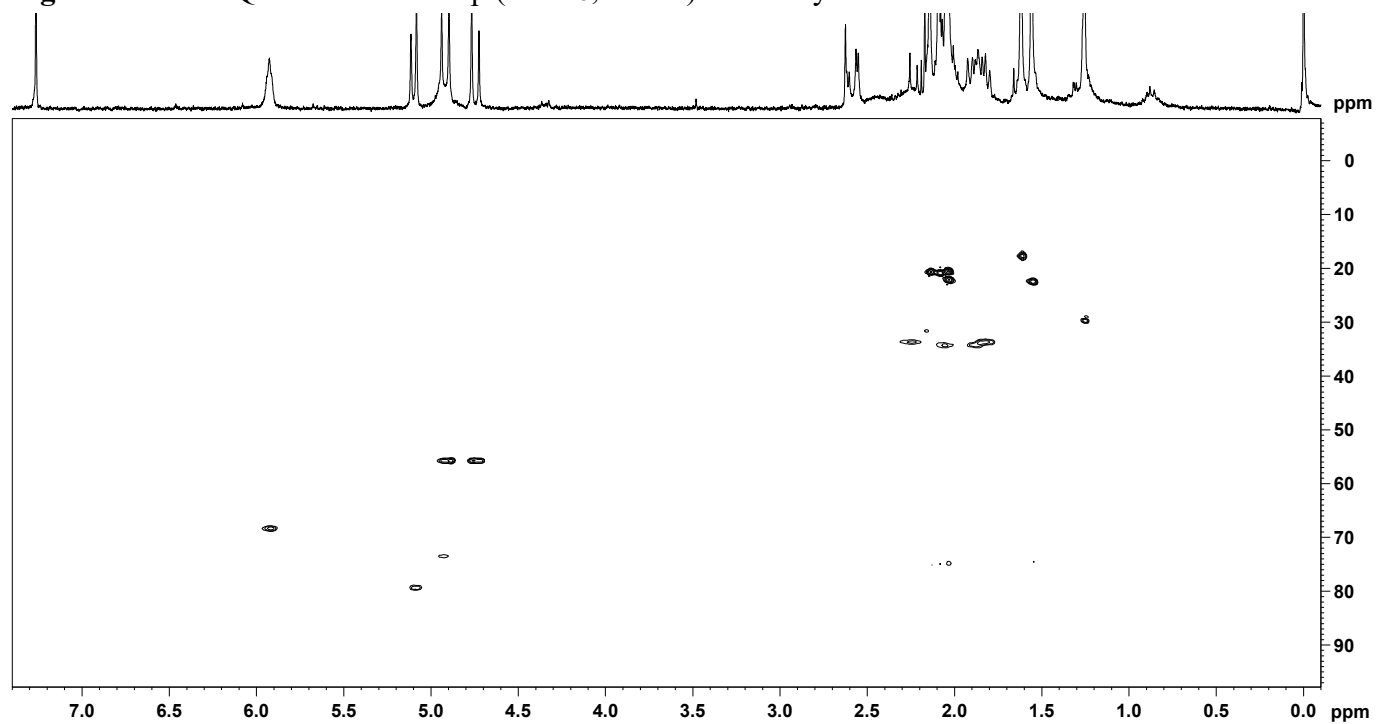

Chemical shift, in ppm (referenced to TMS -  $\delta$  0.00).

**Figure S42** – HMBC correlation map (CDCl<sub>3</sub>, 308 K) of semisynthetic derivative **7a**.

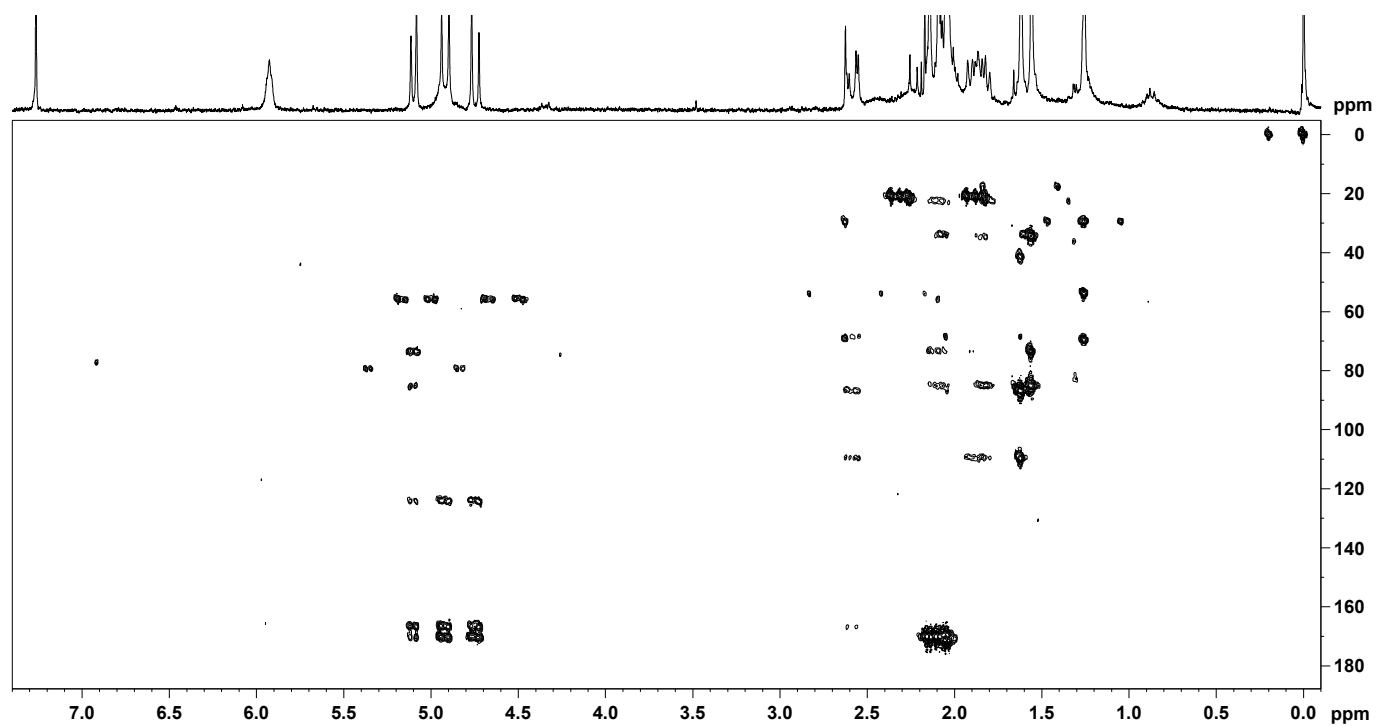

Chemical shift, in ppm (referenced to TMS -  $\delta$  0.00).

**Figure S43** – HRESIMS *full scan* (100-1200 Da) spectrum of semisynthetic derivative **7a**.

RSLA85D 12032019 81 (2.989)

1: TOF MS ES+  
1.92e5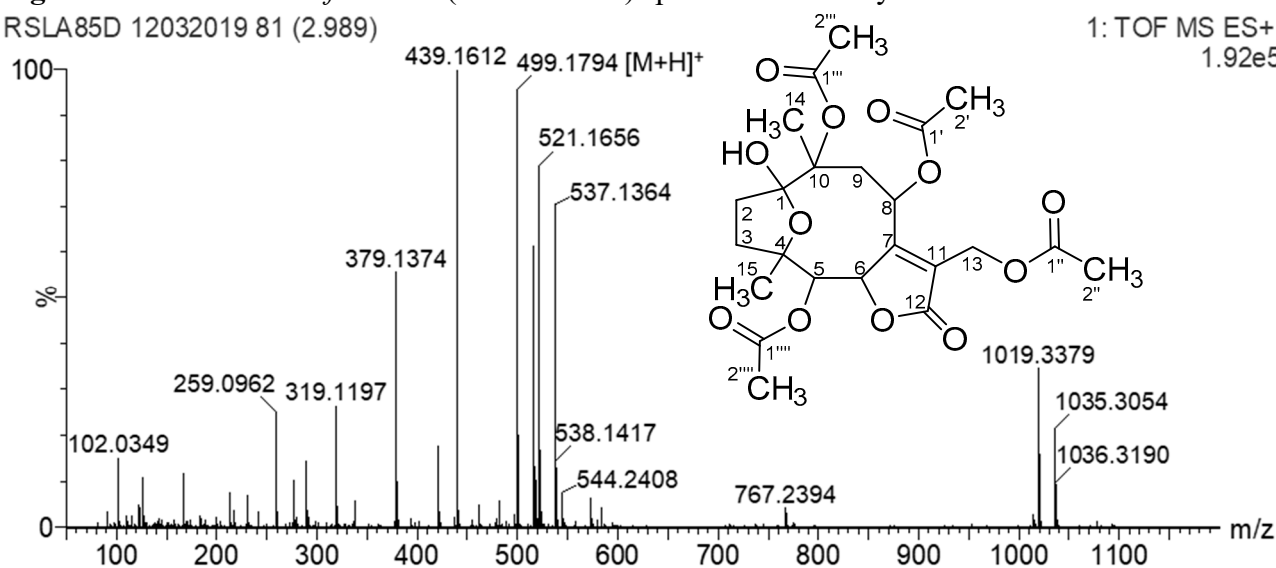**Figure S44** – UV spectrum (200-400 nm) of semisynthetic derivative **7a**.

RSLA85D 12032019 3440 (2.866) Cm (3409:3461)

3: Diode Array  
3.744e-1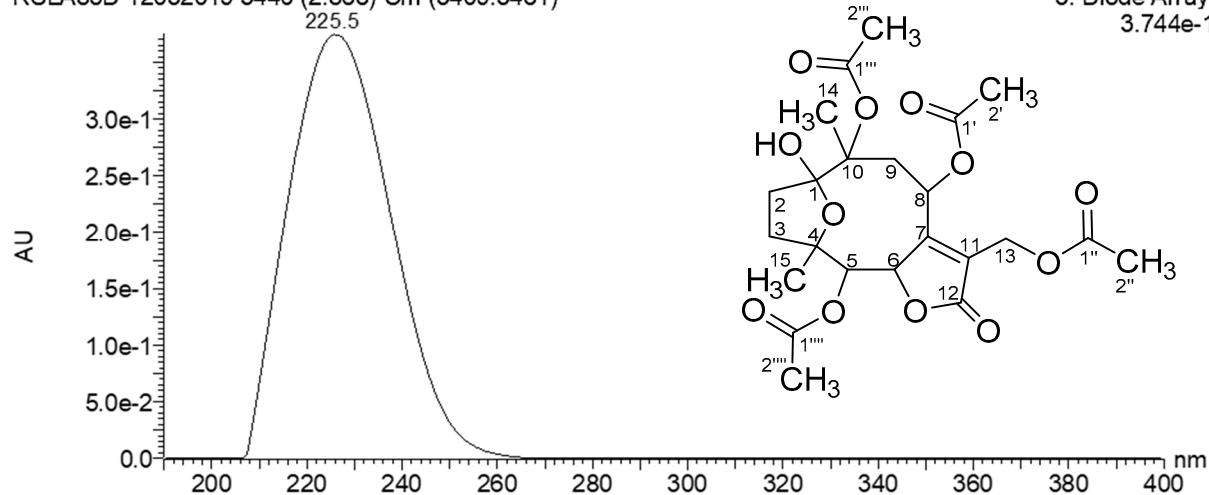

**Figure S45** –  $^1\text{H}$  NMR spectrum (300 MHz,  $\text{CDCl}_3$ , 295 K) of semisynthetic derivative **8a**.

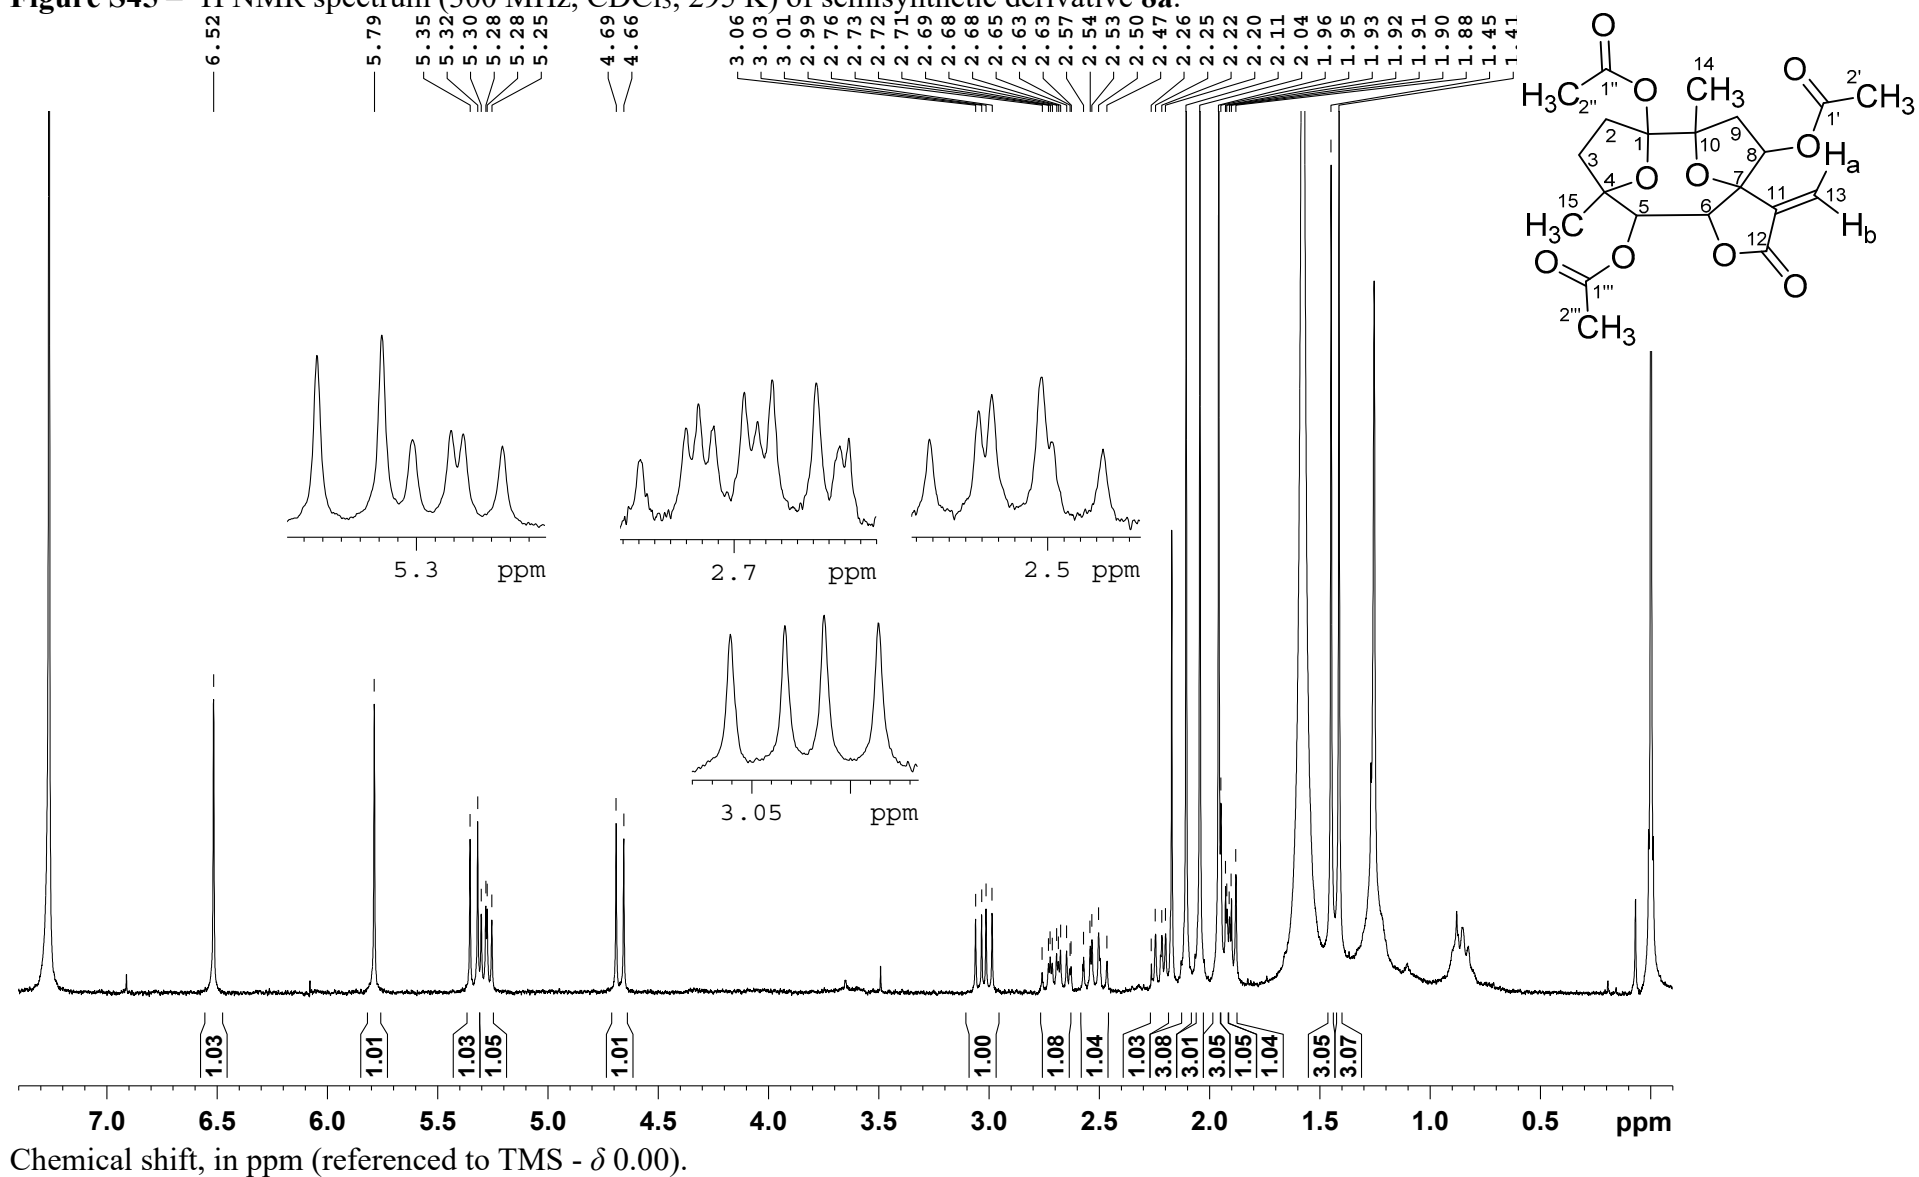

**Figure S46** – HSQC correlation map (CDCl<sub>3</sub>, 295 K) of semisynthetic derivative **8a**.

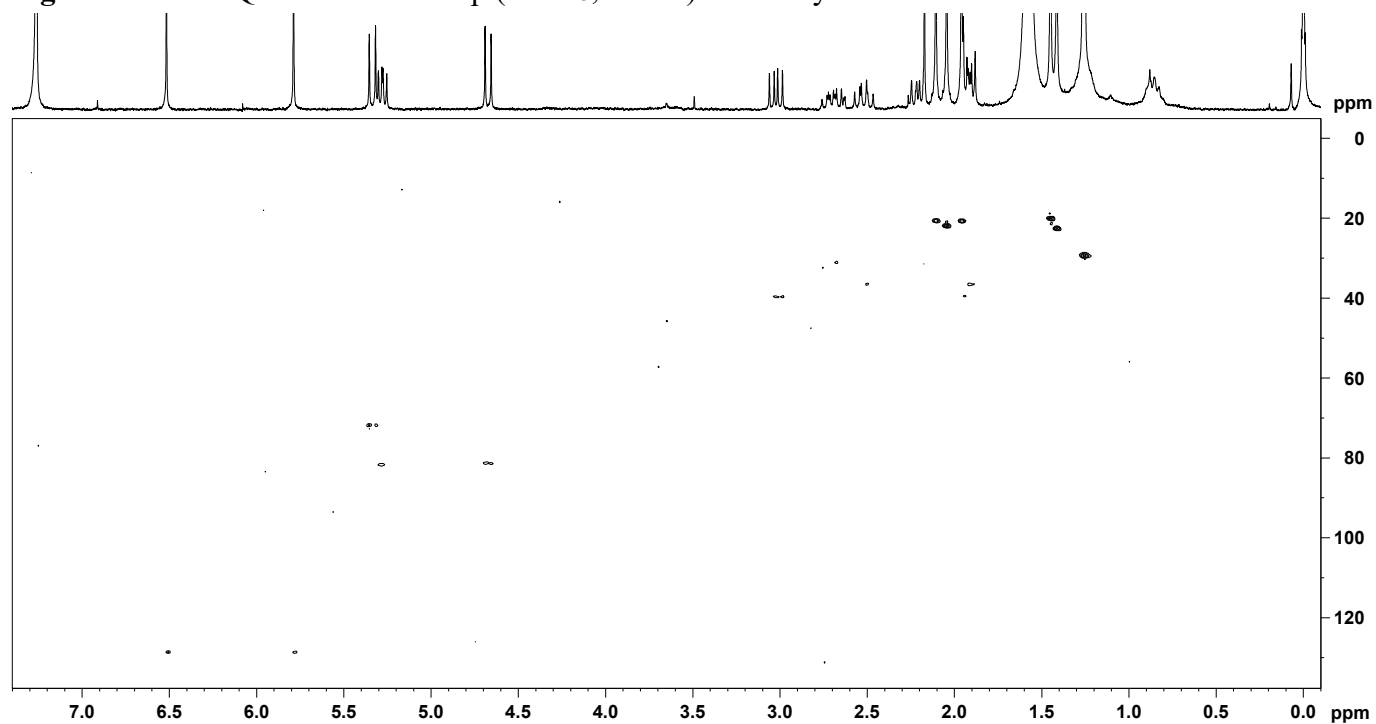

Chemical shift, in ppm (referenced to TMS -  $\delta$  0.00).

**Figure S47** – HMBC correlation map (CDCl<sub>3</sub>, 295 K) of semisynthetic derivative **8a**.

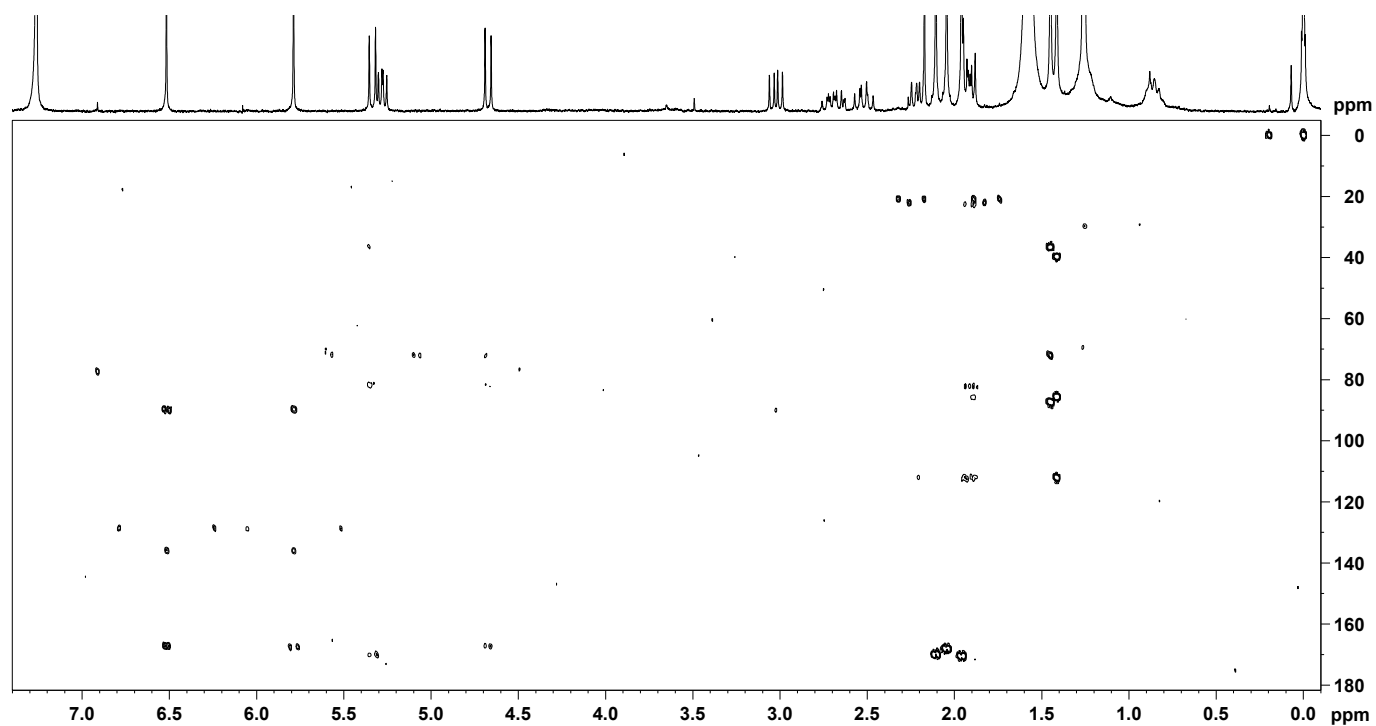

Chemical shift, in ppm (referenced to TMS -  $\delta$  0.00).

**Figure S48** – HRESIMS *full scan* (100-1200 Da) spectrum of semisynthetic derivative **8a**.

RSLA95B 12032019 123 (4.530)

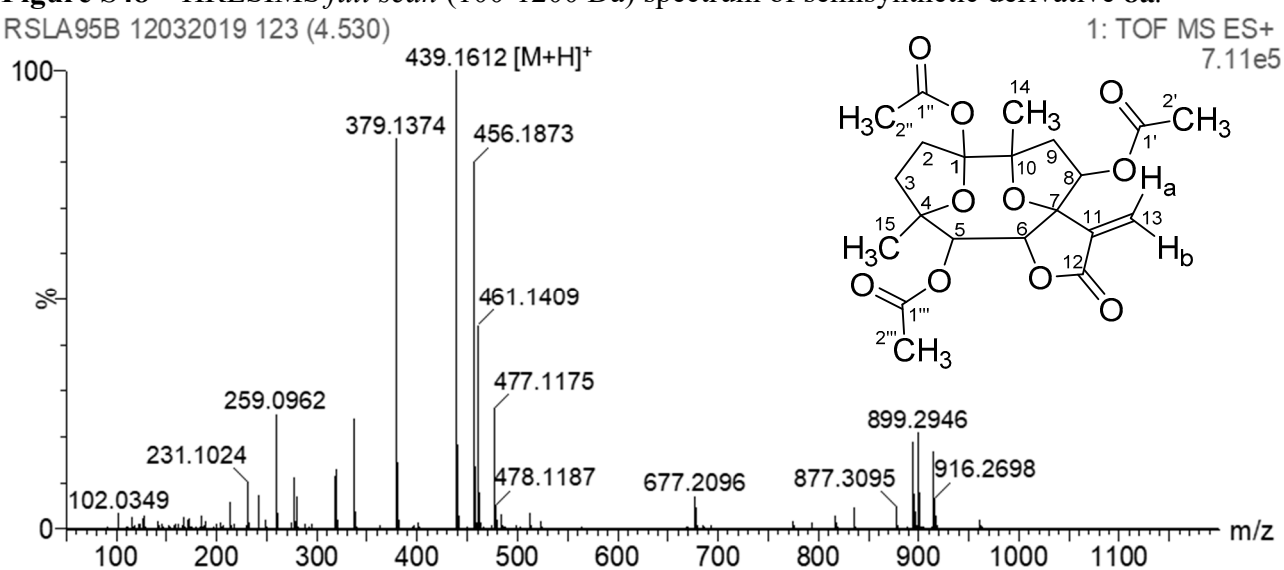

HRESIMS spectrum in positive mode achieved from UPLC-MS analysis.

**Figure S49** – UV spectrum (200-400 nm) of semisynthetic derivative **8a**.

RSLA95B 12032019 5331 (4.442) Cm (5308:5350)

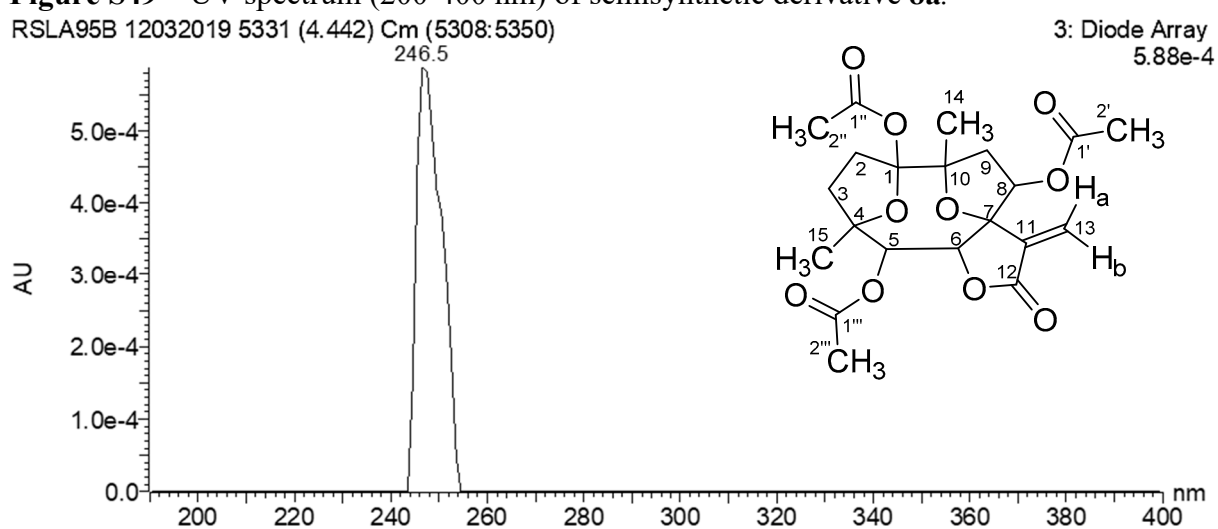

UV spectrum achieved from UPLC-PDA-MS analysis.

**Figure S50** –  $^1\text{H}$  NMR spectrum (300 MHz,  $\text{CDCl}_3$ , 295 K) of semisynthetic derivative **9a**.

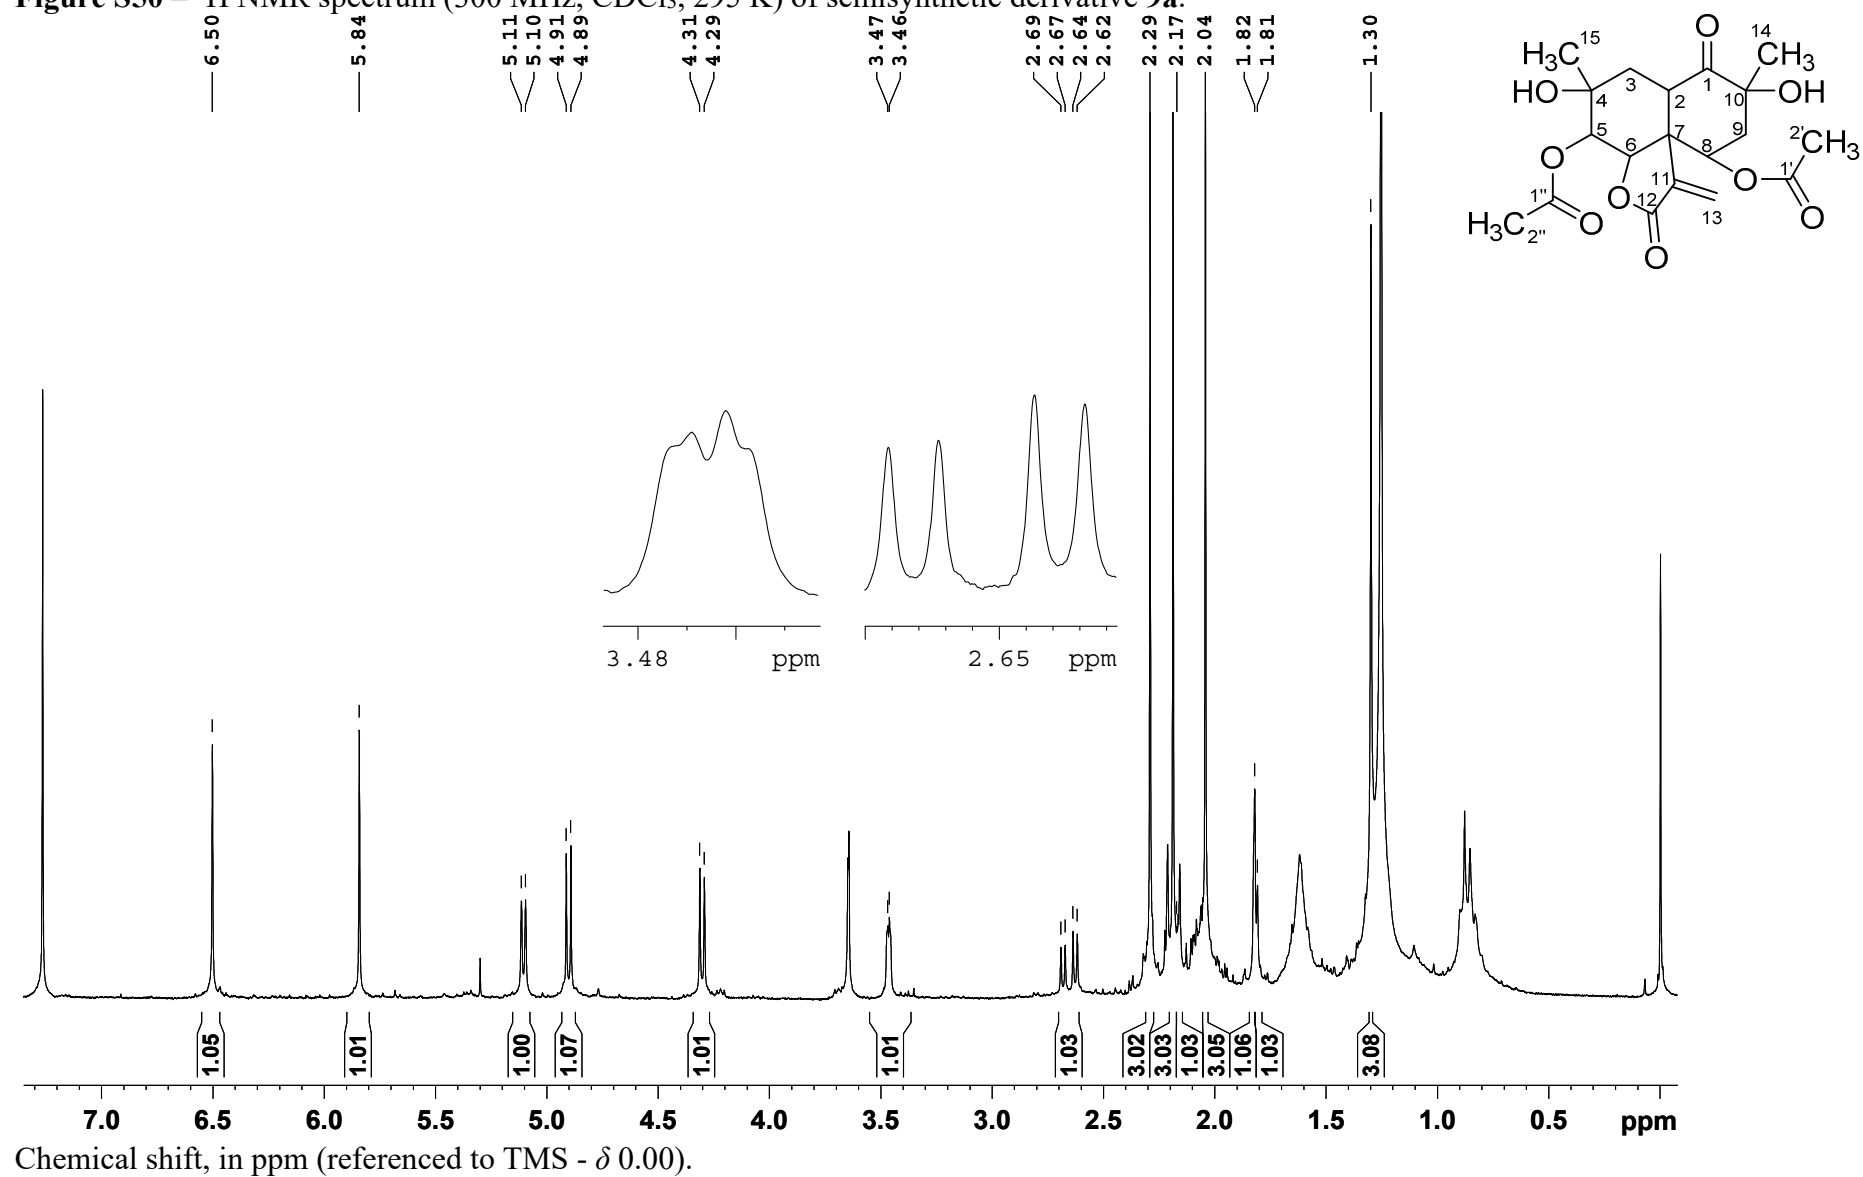



**Figure S51** – HSQC correlation map (CDCl<sub>3</sub>, 295 K) of semisynthetic derivative **9a**.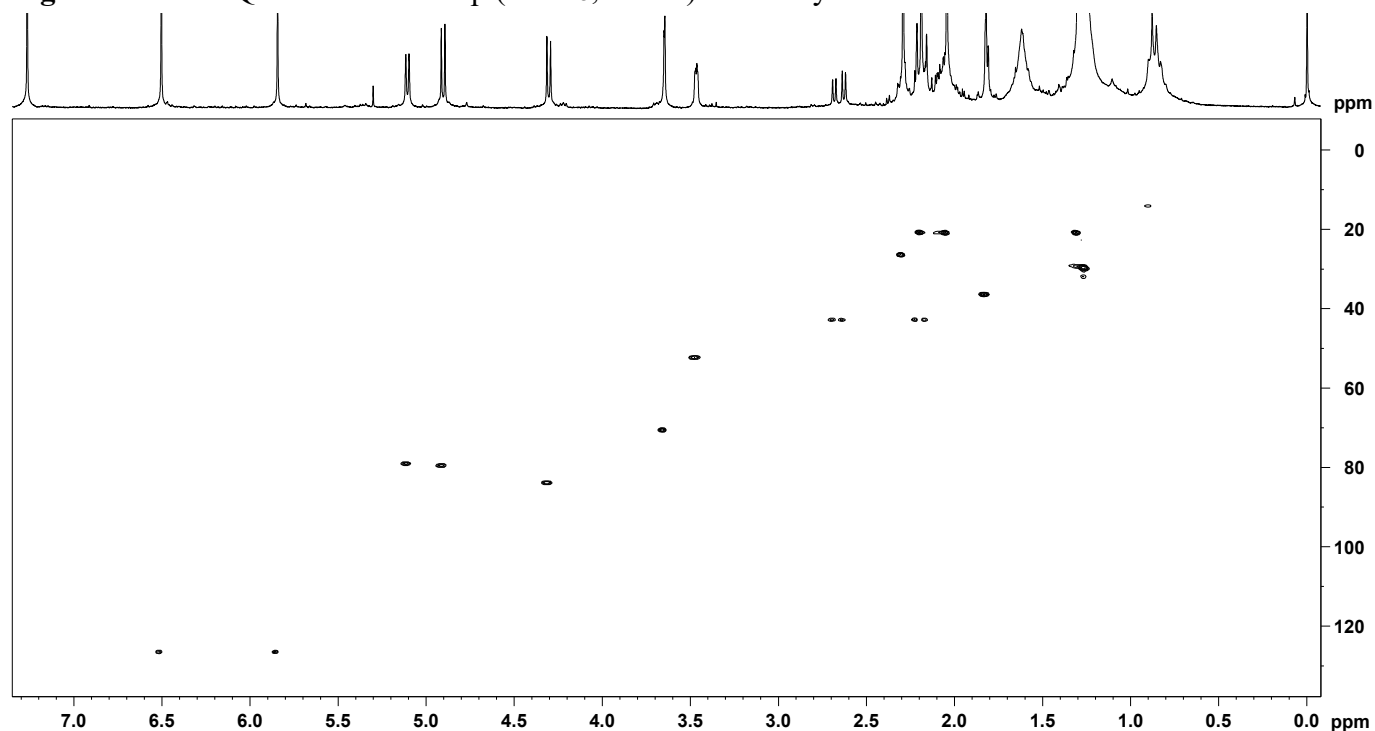

Chemical shift, in ppm (referenced to TMS -  $\delta$  0.00).

**Figure S52** – HMBC correlation map (CDCl<sub>3</sub>, 295 K) of semisynthetic derivative **9a**.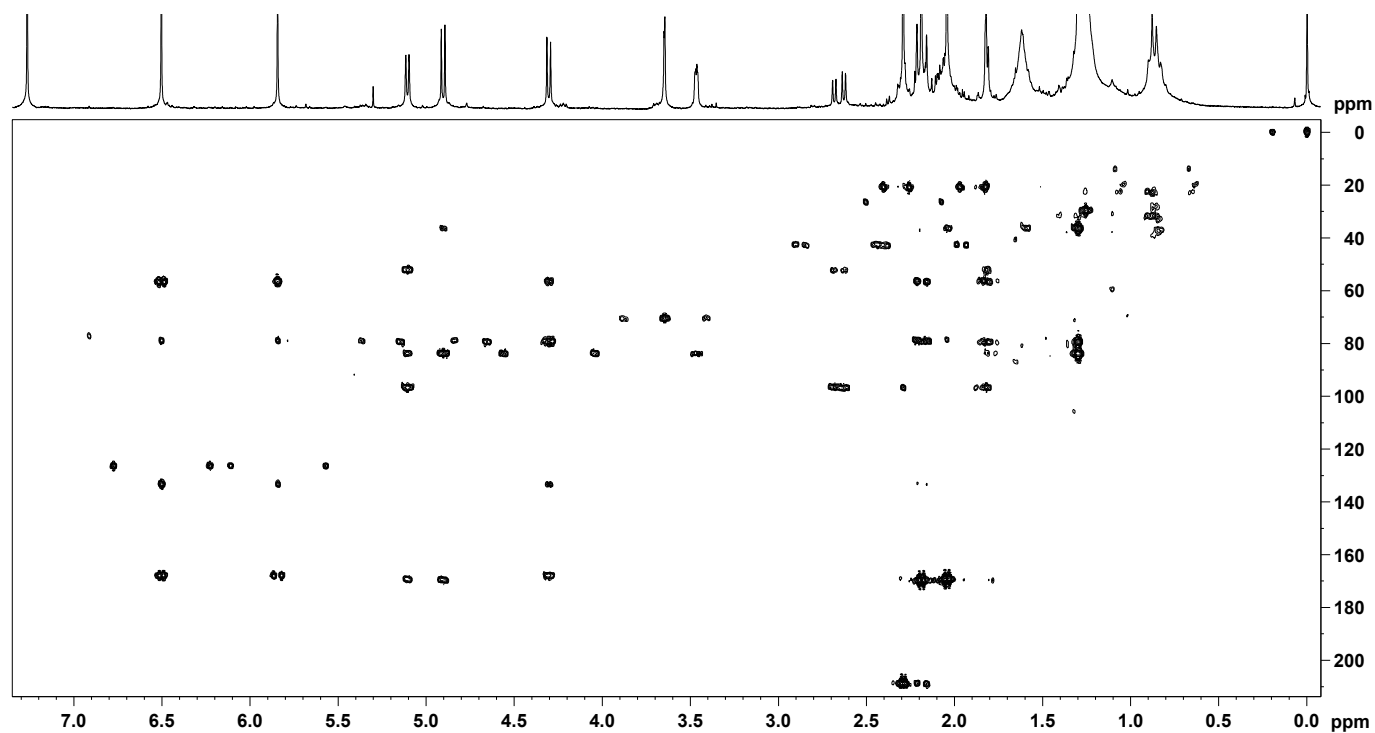

Chemical shift, in ppm (referenced to TMS -  $\delta$  0.00).

**Figure S53** – HRESIMS *full scan* (100-1200 Da) spectrum of semisynthetic derivative **9a**.

RSLA101A 12032019 71 (2.622)

1: TOF MS ES+  
3.78e4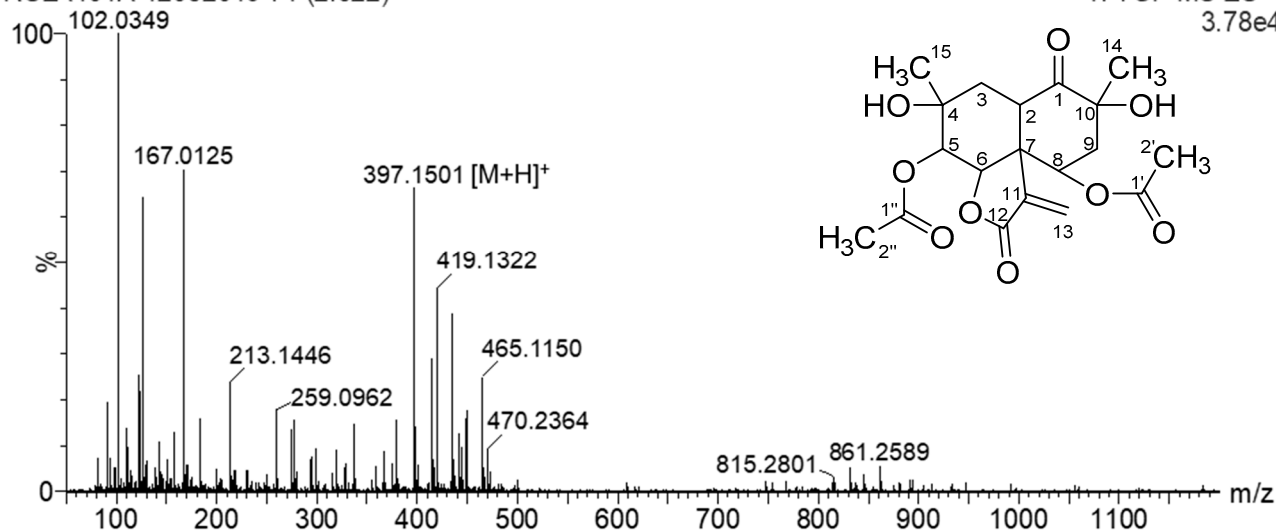

HRESIMS spectrum in positive mode achieved from UPLC-MS analysis.

**Figure S54** – UV spectrum (200-400 nm) of semisynthetic derivative **9a**.

RSLA101A 12032019 3270 (2.724) Cm (3254:3283)

3: Diode Array  
1.198e-3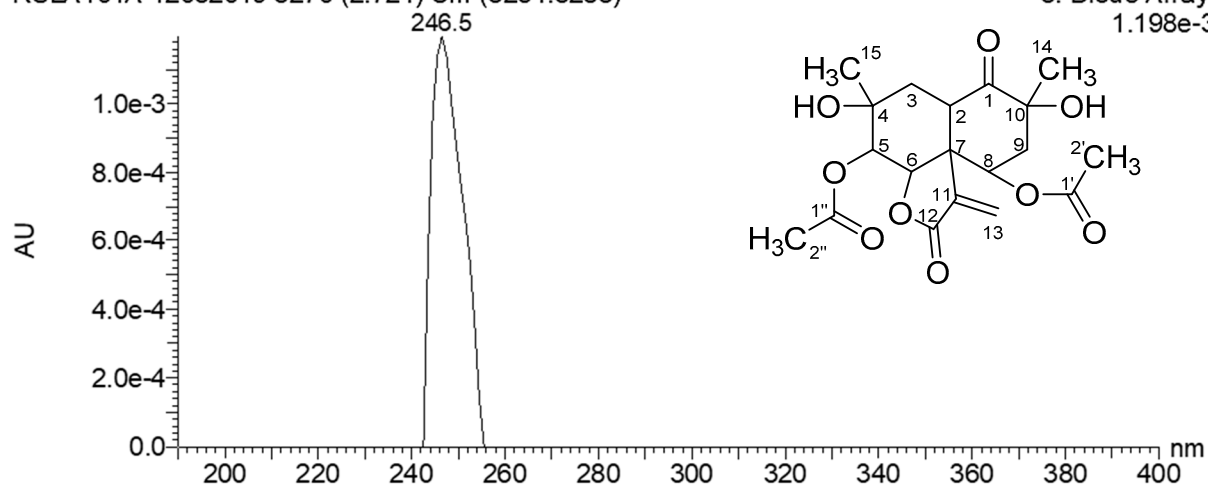

UV spectrum achieved from UPLC-PDA-MS analysis.

**Figure S55** –  $^1\text{H}$  NMR spectrum (300 MHz,  $\text{CDCl}_3$ , 295 K) of semisynthetic derivative **7b**.

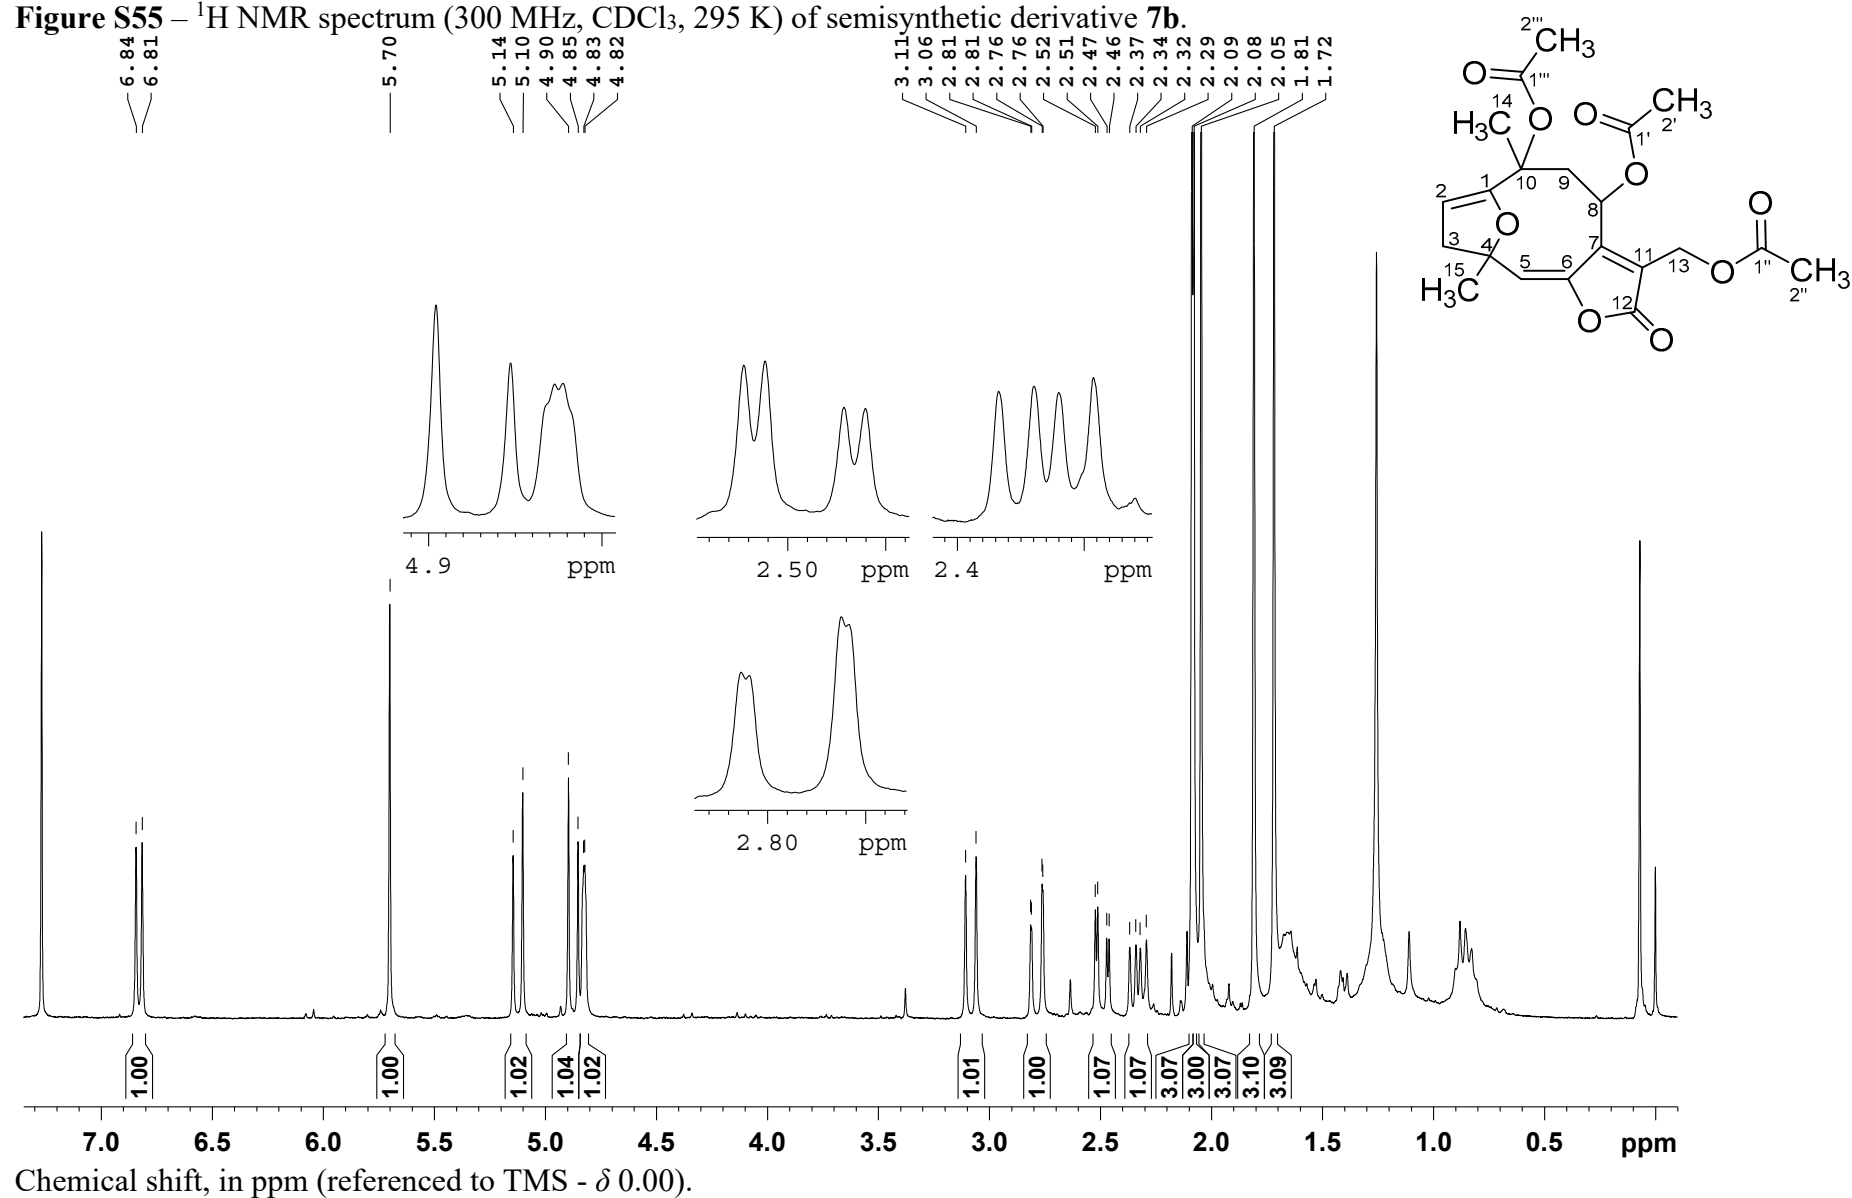

**Figure S56** – HSQC correlation map (CDCl<sub>3</sub>, 295 K) of semisynthetic derivative **7b**.

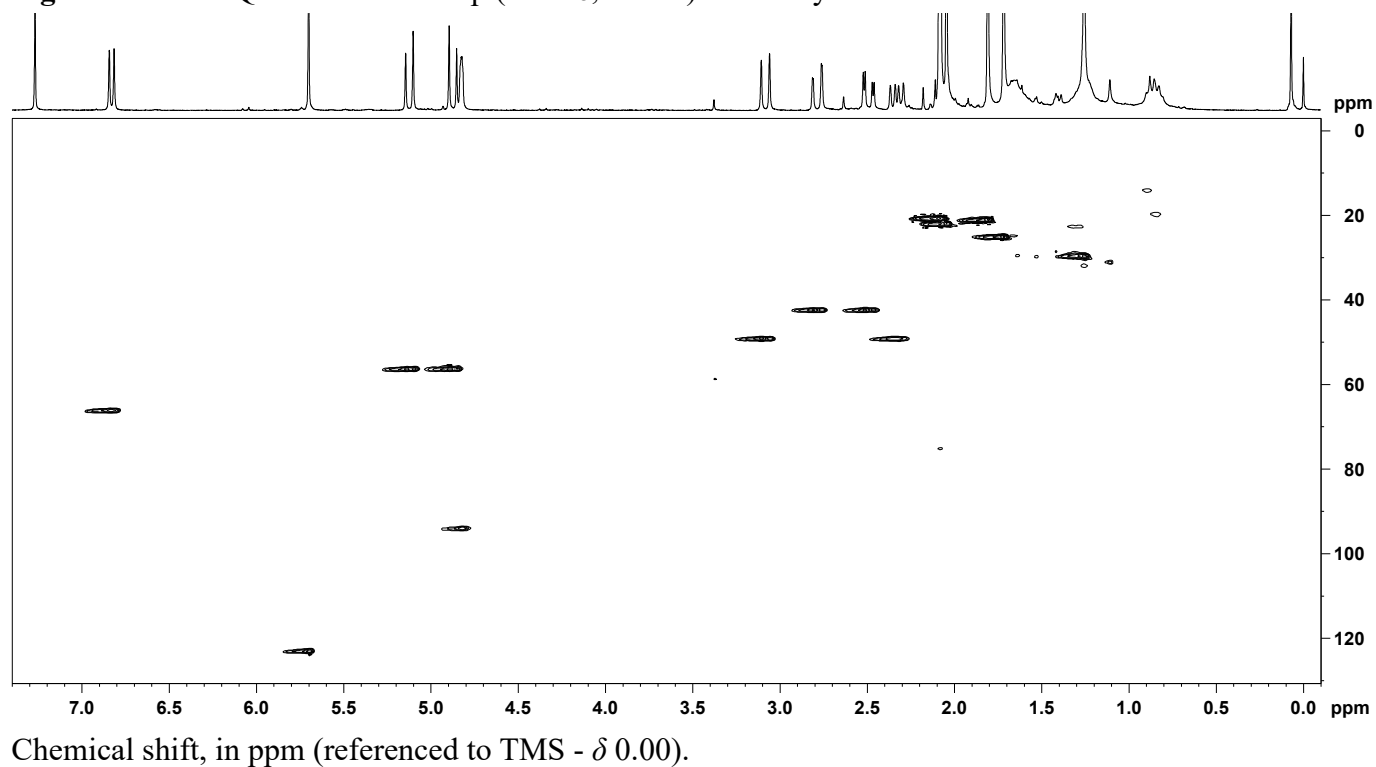

**Figure S57** – HMBC correlation map (CDCl<sub>3</sub>, 295 K) of semisynthetic derivative **7b**.

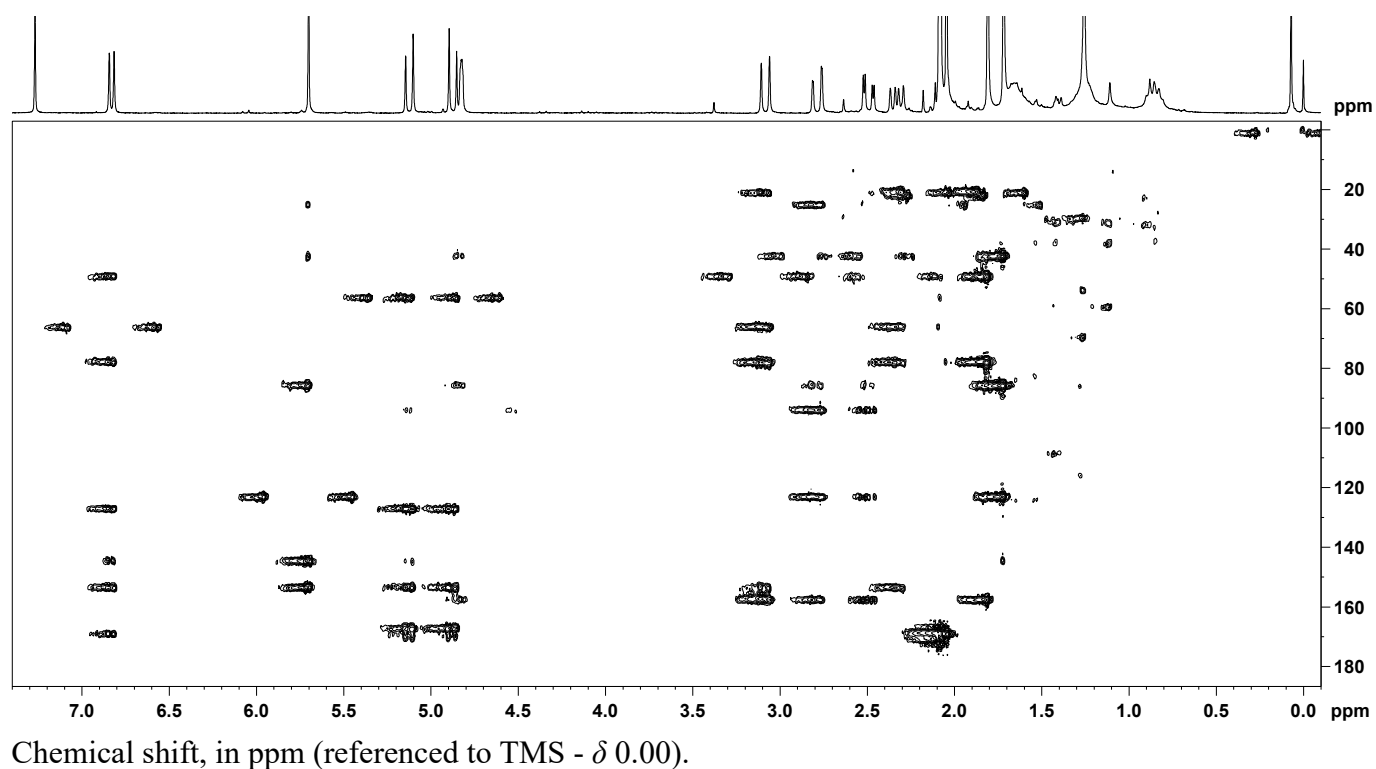

**Figure S58** – HRESIMS *full scan* (100-1200 Da) spectrum of semisynthetic derivative **7b**.

RSLA60A 12032019 139 (5.117)

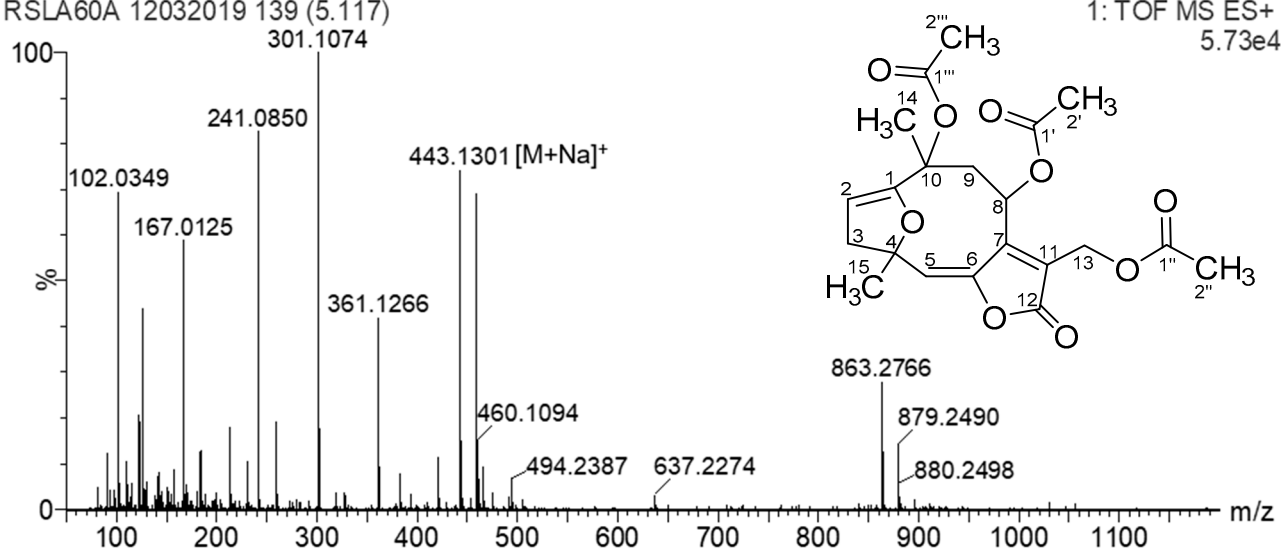

HRESIMS spectrum in positive mode achieved from UPLC-MS analysis.

**Figure S59** – UV spectrum (200-400 nm) of semisynthetic derivative **7b**.

RSLA60A 12032019 5964 (4.969) Cm (5872:6027)

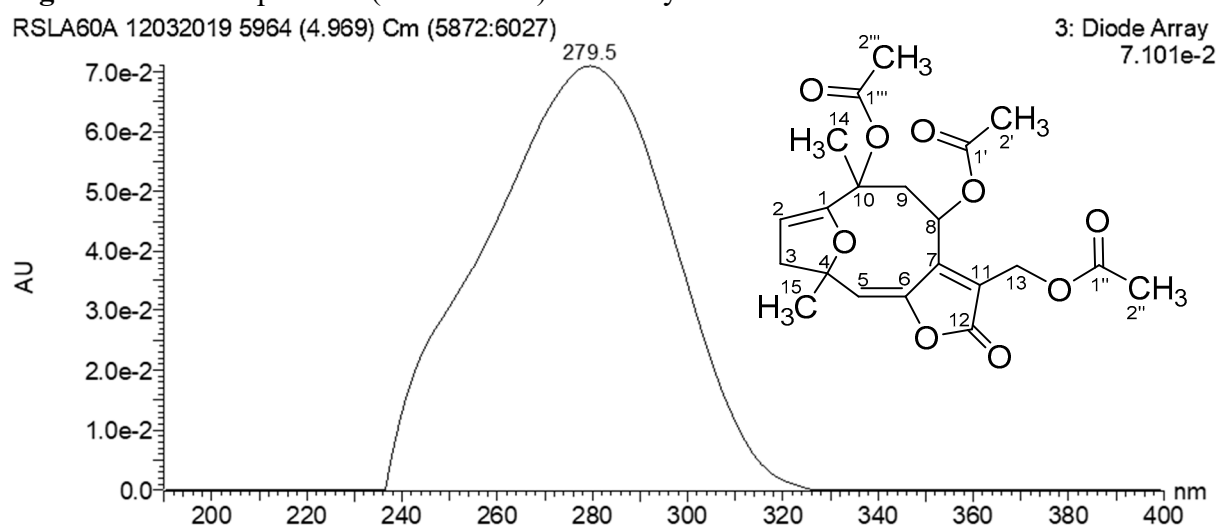

UV spectrum achieved from UPLC-PDA-MS analysis.

**Figure S60** –  $^1\text{H}$  NMR spectrum (300 MHz,  $\text{CDCl}_3$ , 278 K) of semisynthetic derivative **7c**.

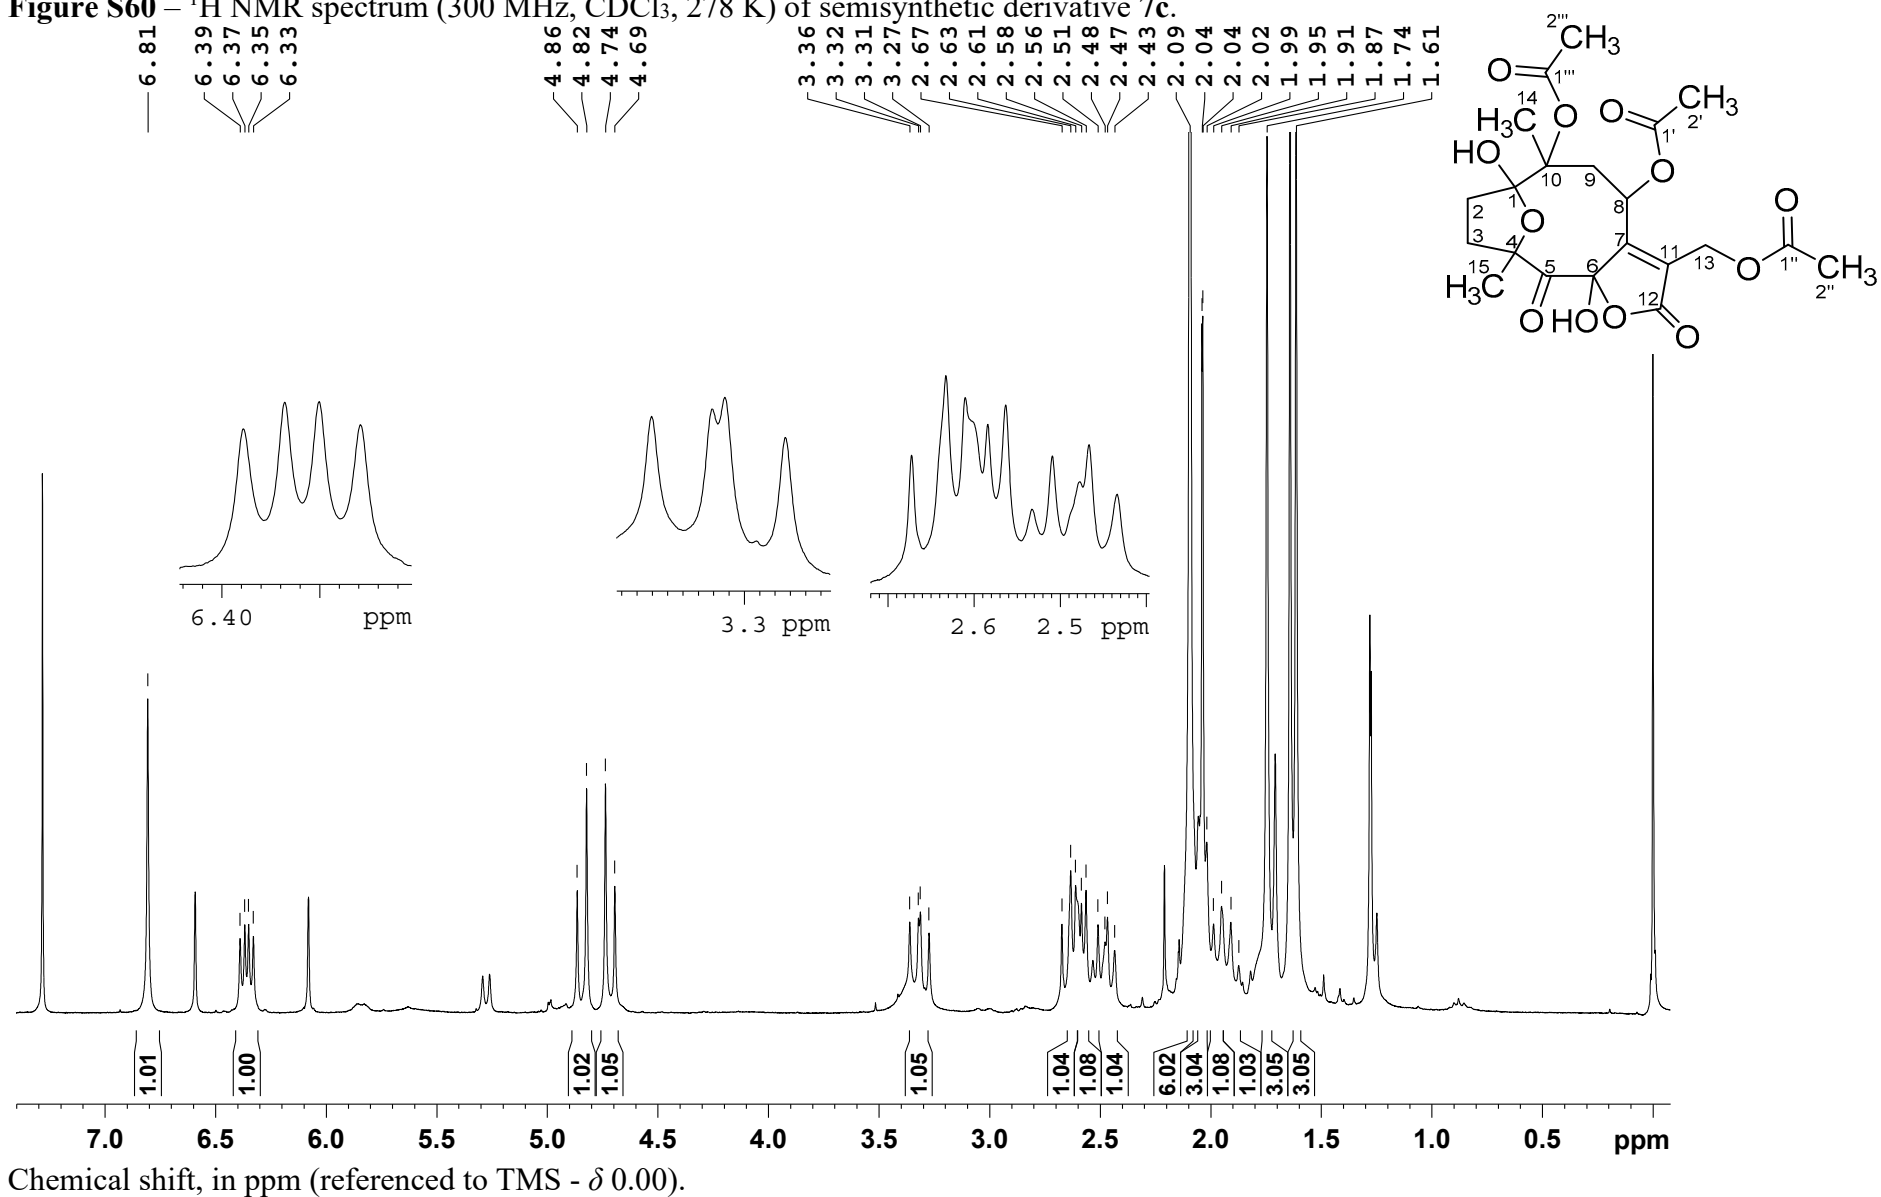

**Figure S61** – HSQC correlation map (CDCl<sub>3</sub>, 278 K) of semisynthetic derivative **7c**.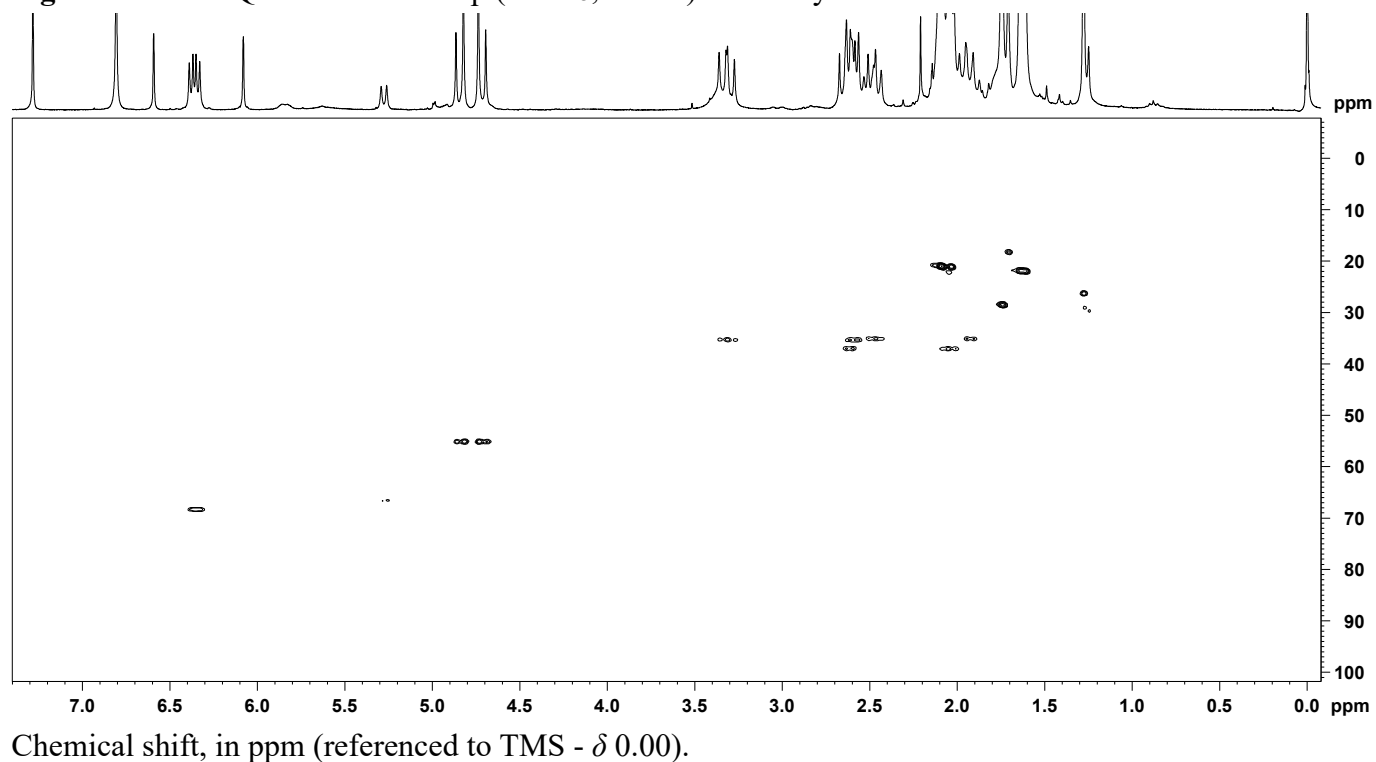**Figure S62** – HMBC correlation map (CDCl<sub>3</sub>, 278 K) of semisynthetic derivative **7c**.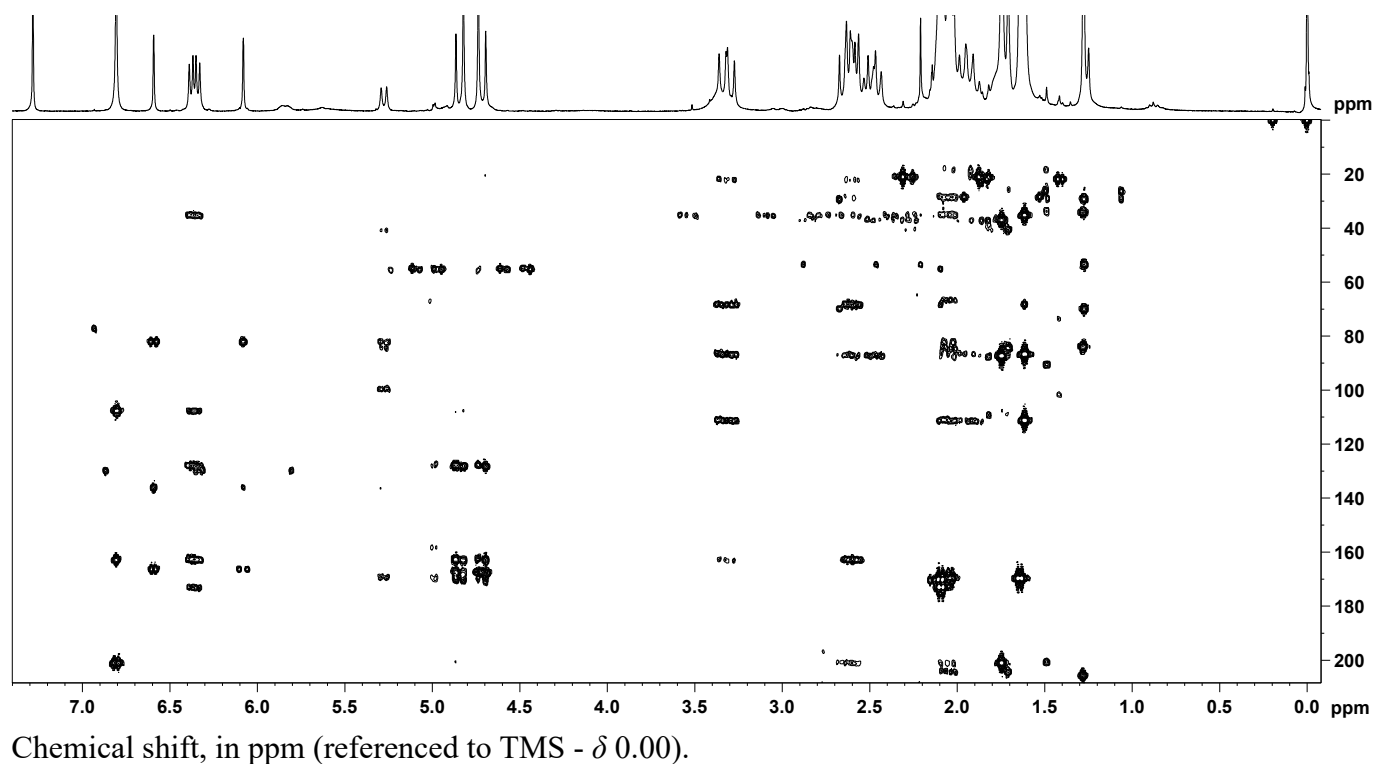

**Figure S63** – HRESIMS *full scan* (100-1200 Da) spectrum of semisynthetic derivative **7c**.

RSLA67D 12032019 79 (2.916) Cm (78:80)

1: TOF MS ES+  
8.53e6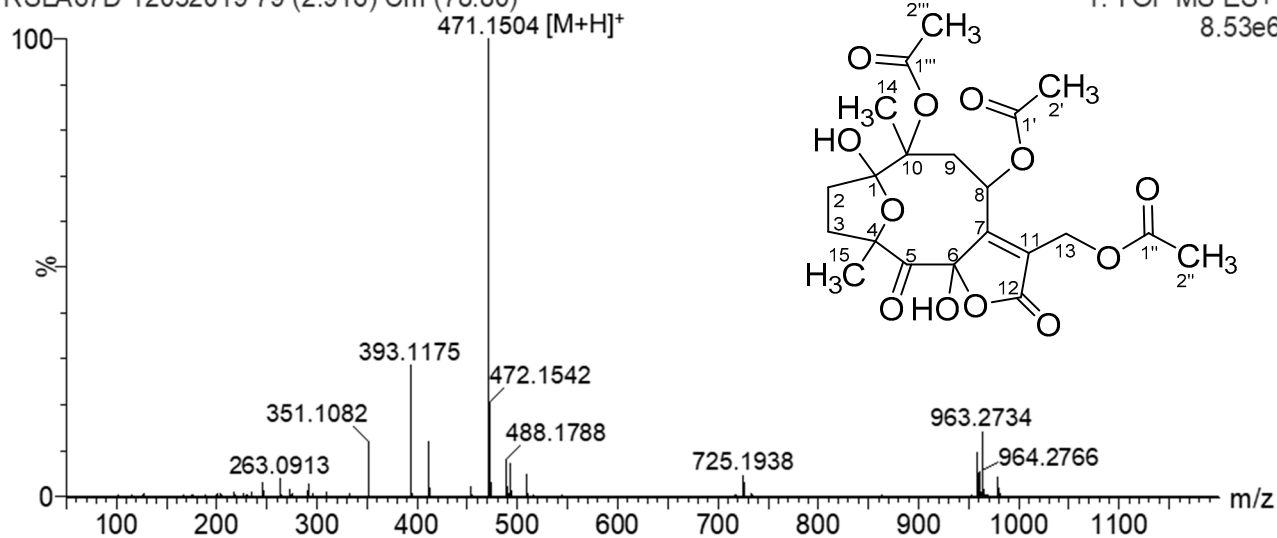

HRESIMS spectrum in positive mode achieved from UPLC-MS analysis.

**Figure S64** – UV spectrum (200-400 nm) of semisynthetic derivative **7c**.

RSLA67D 12032019 3454 (2.878) Cm (3413:3484)

3: Diode Array  
3.473e-2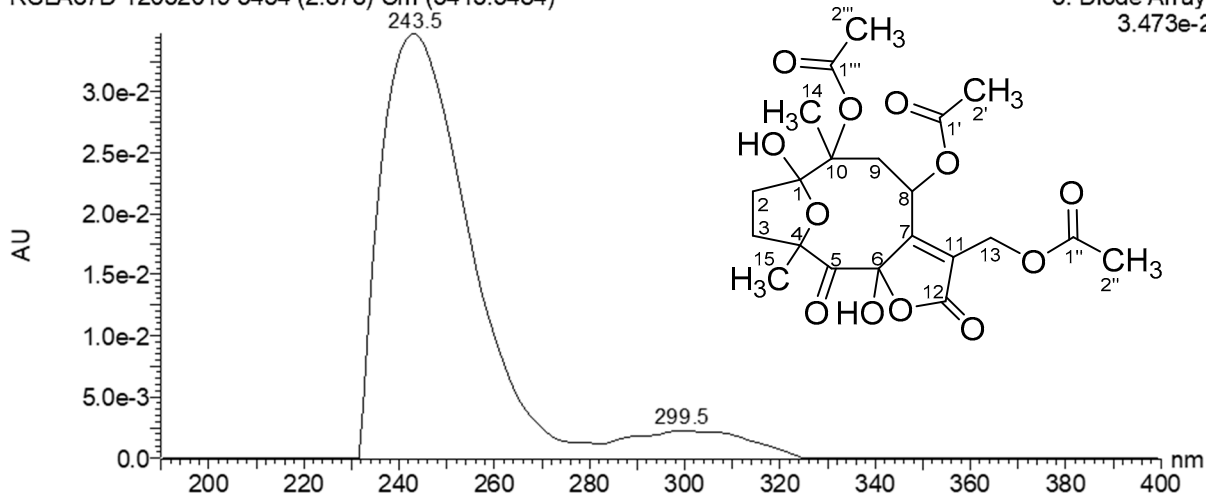

UV spectrum achieved from UPLC-PDA-MS analysis.



**Figure S65** –  $^1\text{H}$  NMR spectrum (300 MHz,  $\text{CDCl}_3$ , 295 K) of semisynthetic derivative **7c.1**.

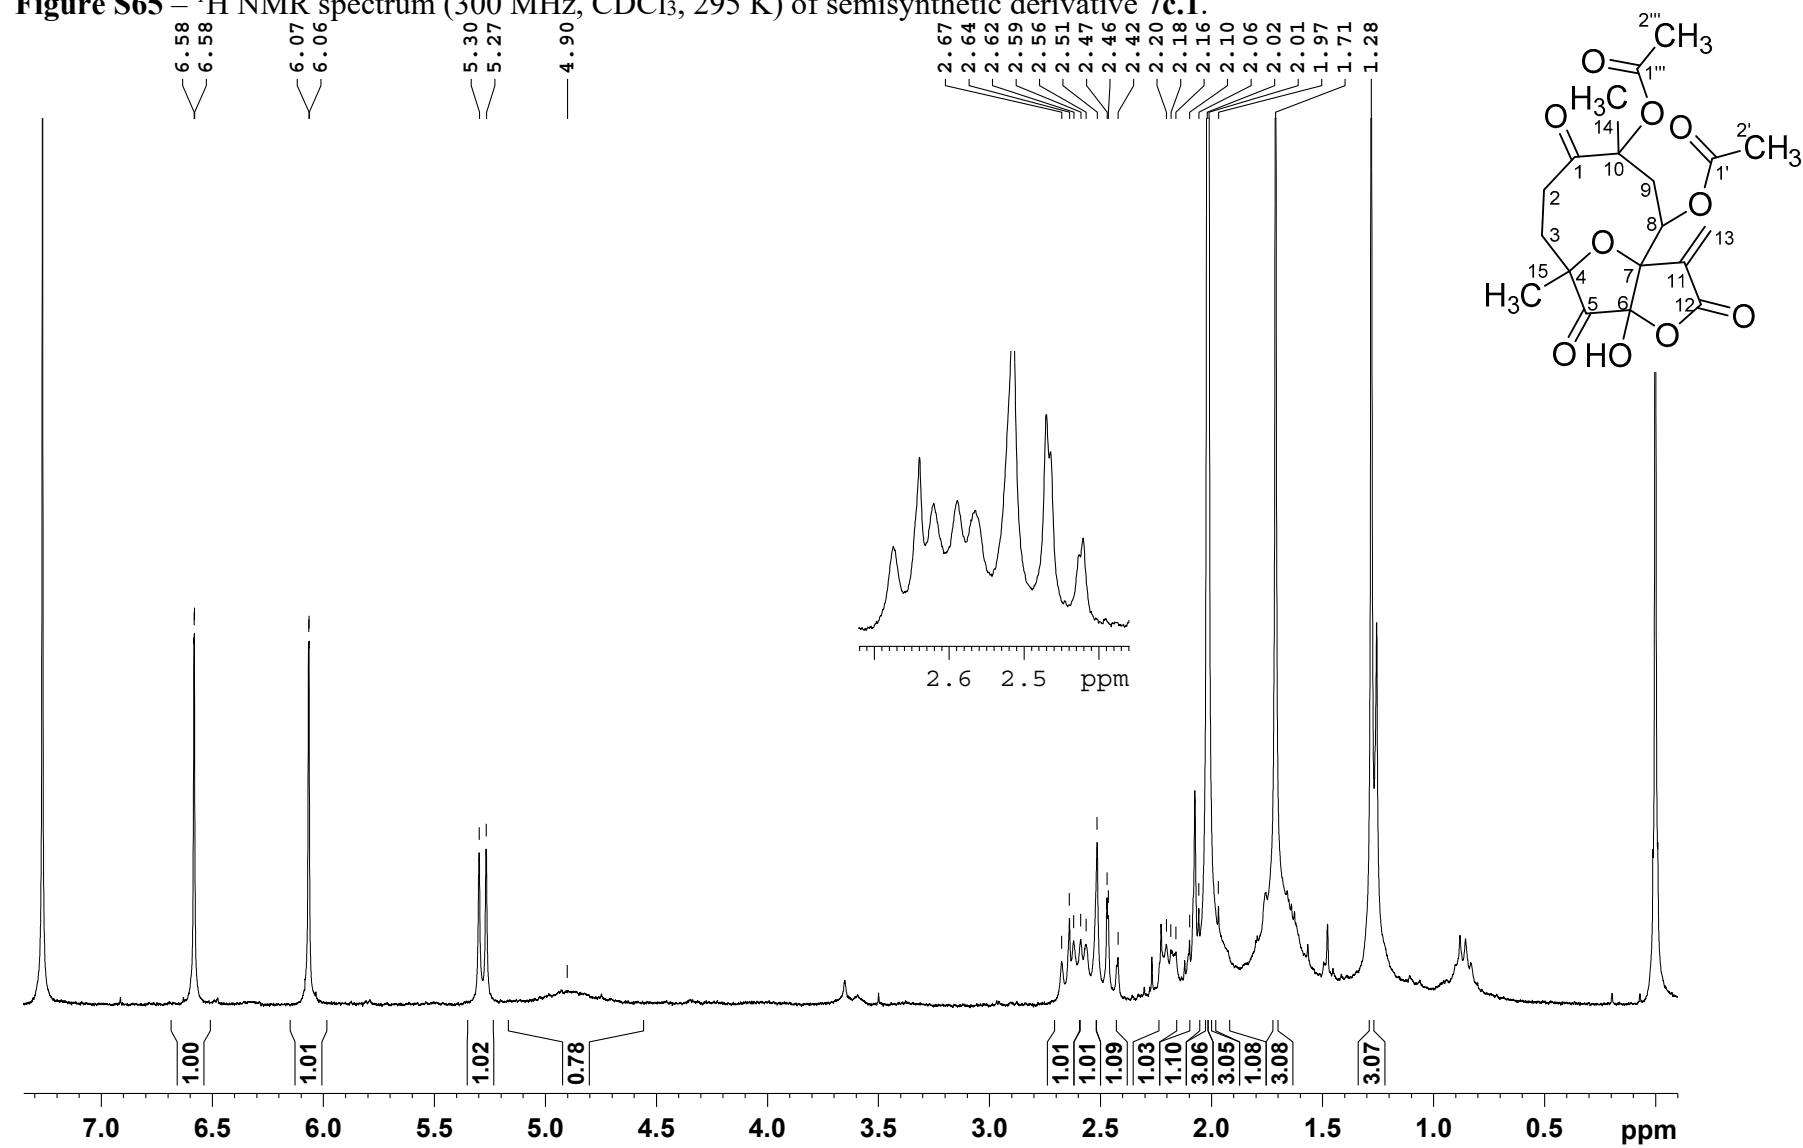

**Figure S66** – HSQC correlation map (CDCl<sub>3</sub>, 295 K) of semisynthetic derivative **7c.1**.

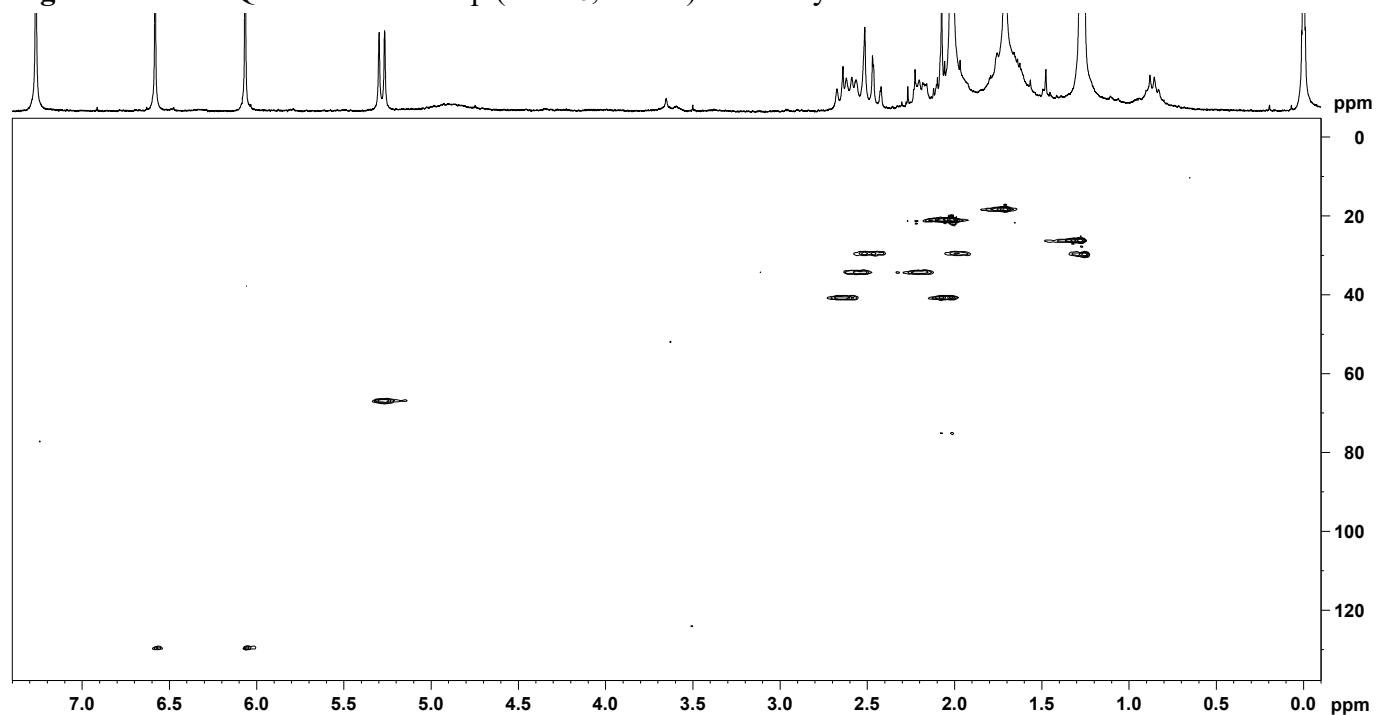

Chemical shift, in ppm (referenced to TMS -  $\delta$  0.00).

**Figure S67** – HMBC correlation map (CDCl<sub>3</sub>, 295 K) of semisynthetic derivative **7c.1**.

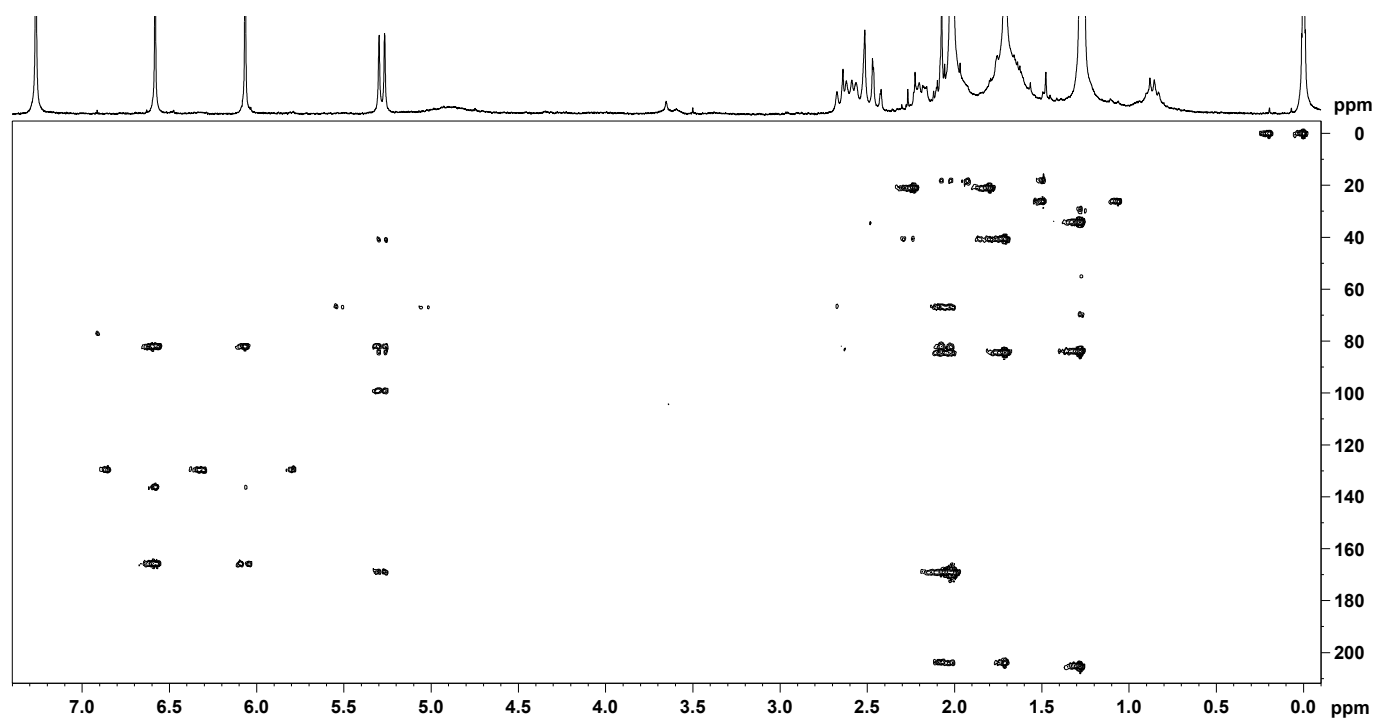

Chemical shift, in ppm (referenced to TMS -  $\delta$  0.00).

**Figure S68** – HRESIMS *full scan* (100-1200 Da) spectrum of semisynthetic derivative **7c.1**.

RSLA100D 12032019 75 (2.769) Cm (75)

1: TOF MS ES+  
9.19e5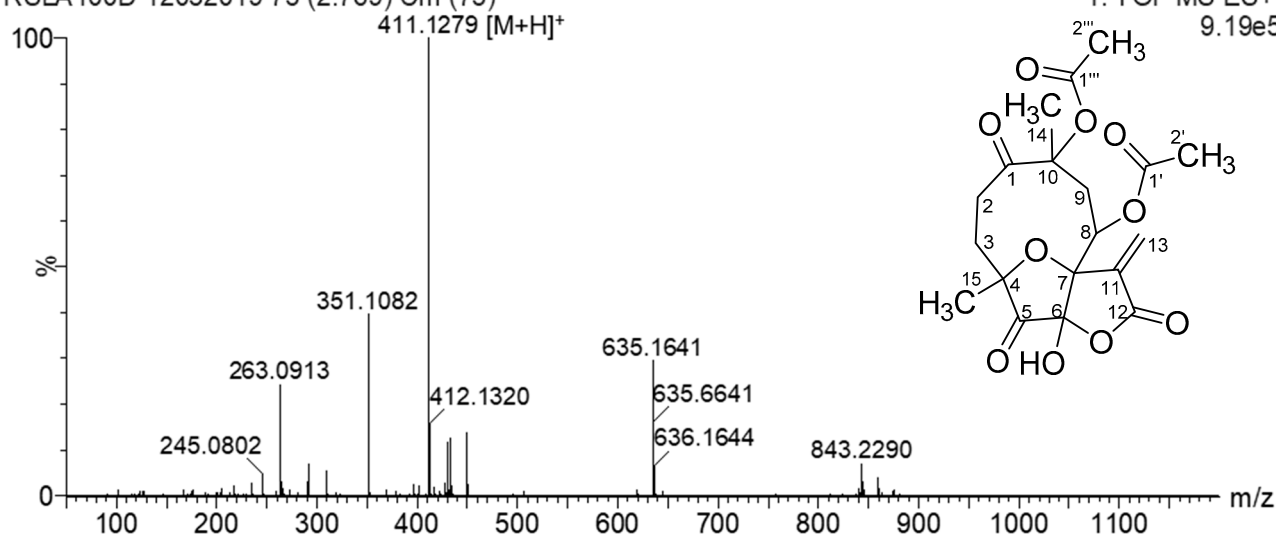

HRESIMS spectrum in positive mode achieved from UPLC-MS analysis.

**Figure S69** – UV spectrum (200-400 nm) of semisynthetic derivative **7c.1**.

RSLA100D 12032019 3282 (2.734) Cm (3265:3294)

3: Diode Array  
1.681e-3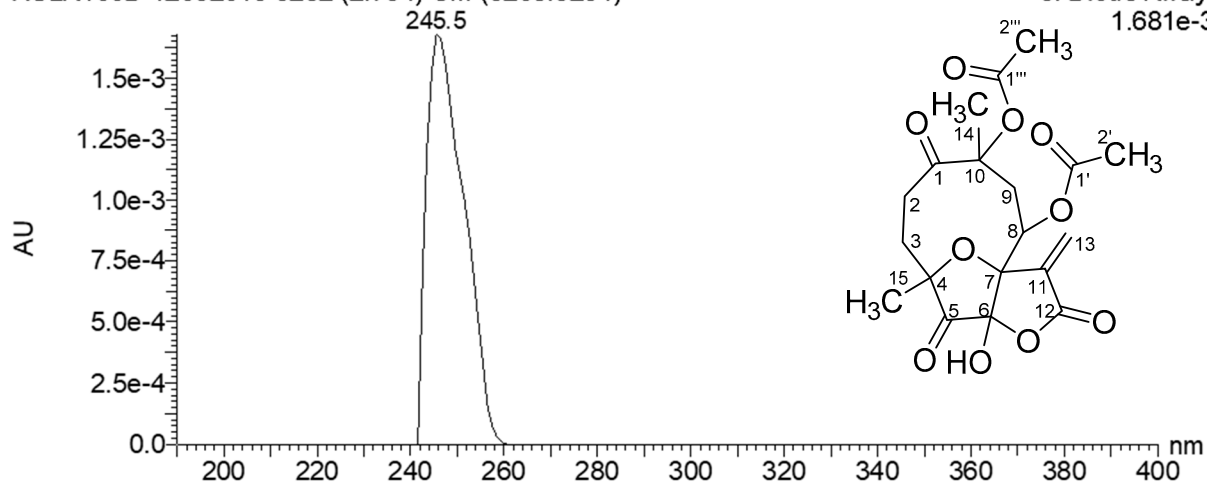

UV spectrum achieved from UPLC-PDA-MS analysis.

**Figure S70 – Evaluation of the macrophage J774A.1 cell viability treated with SLs 1-12.**

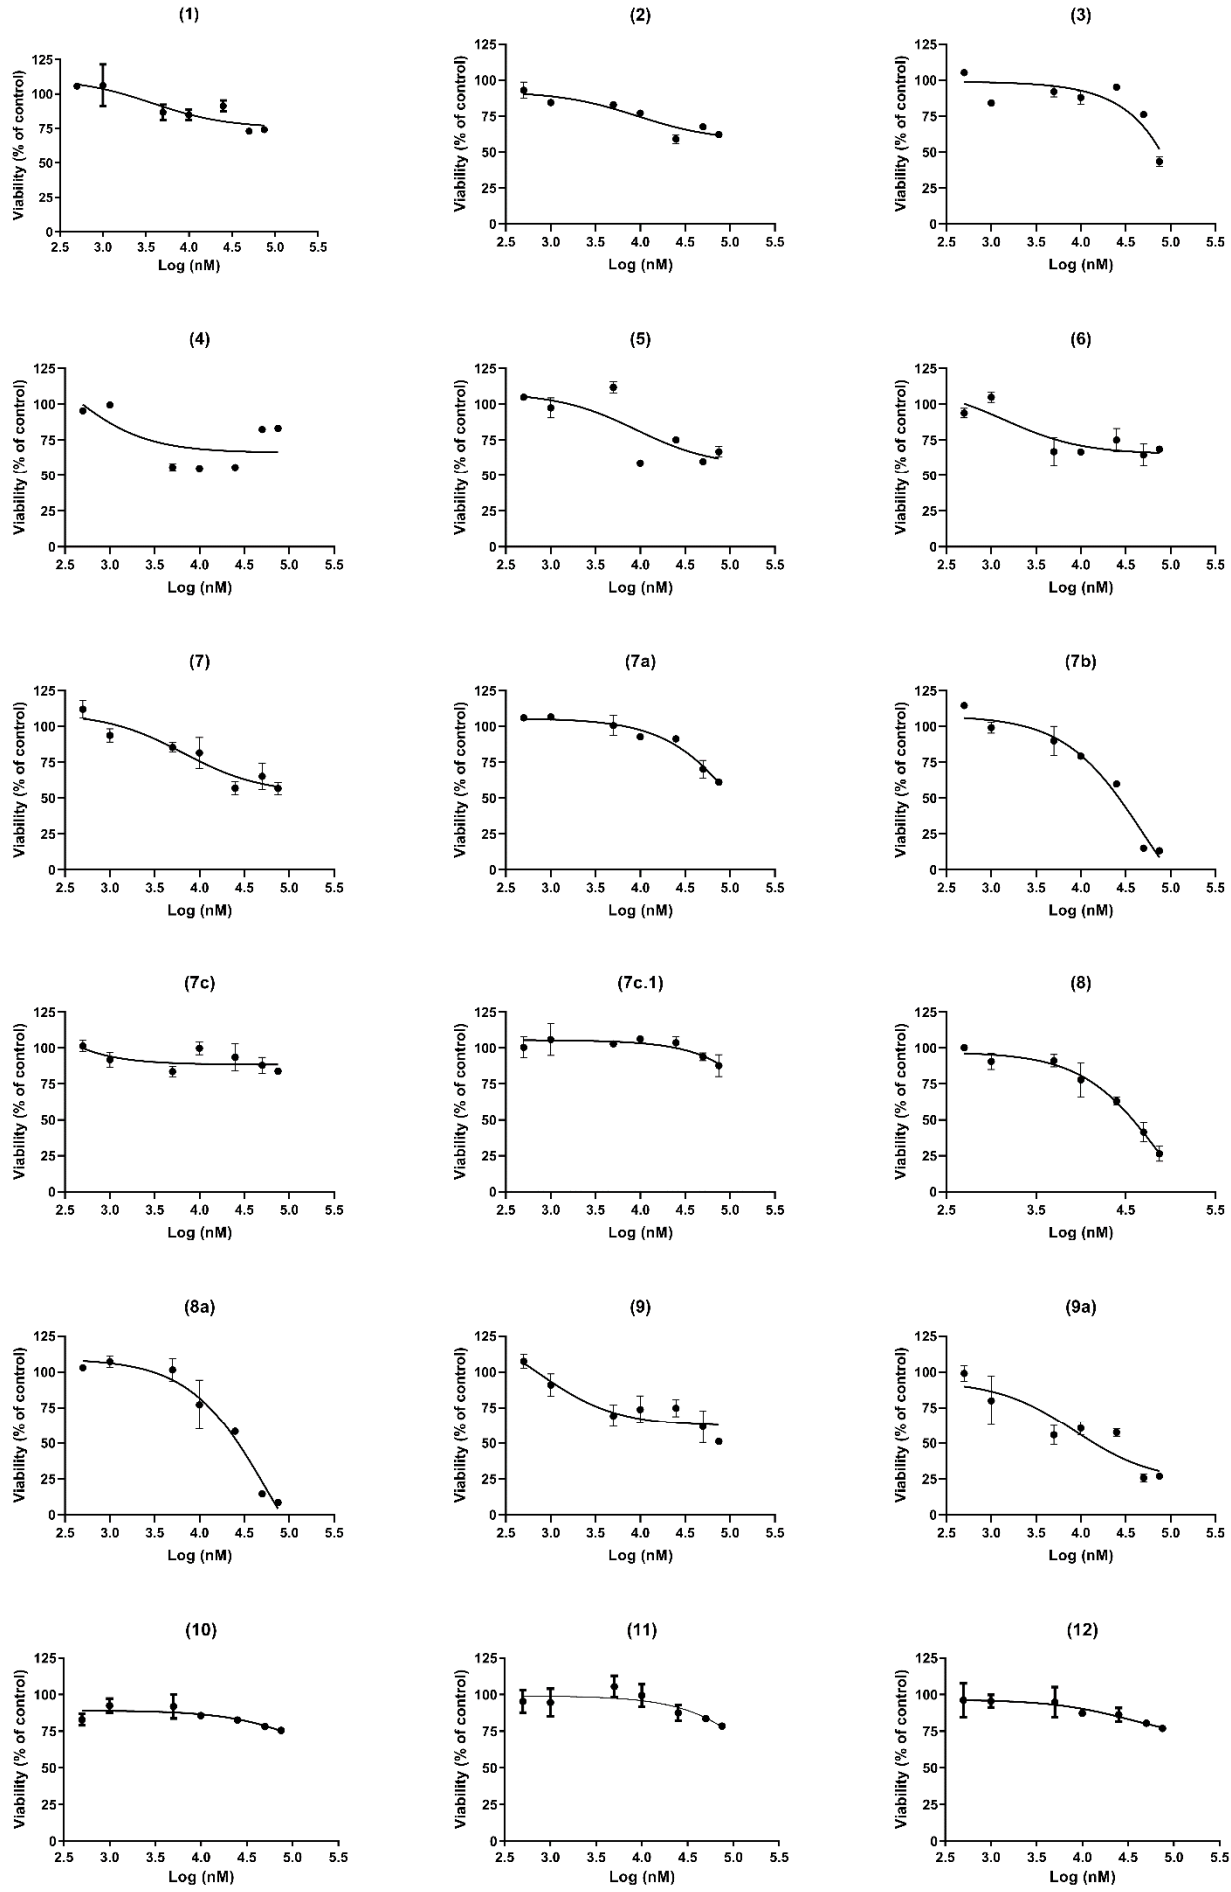

Supplement: s1 [file s1]
